# Supplementary material for: Effectiveness of the e-Tabac Info Service application for smoking cessation: a pragmatic randomised controlled trial
Source: PubMed Central journal article supplement — BMJ Open. 2020 Oct 27;10(10):e039515. doi: 10.1136/bmjopen-2020-039515 (PMC7592285; doi:10.1136/bmjopen-2020-039515), 2020-10-27
Supplement: bmjopen-2020-039515.draft_revisions.pdf [file bmjopen-2020-039515.draft_revisions.pdf]

# BMJ Open

BMJ Open is committed to open peer review. As part of this commitment we make the peer review history of every article we publish publicly available.

When an article is published we post the peer reviewers' comments and the authors' responses online. We also post the versions of the paper that were used during peer review. These are the versions that the peer review comments apply to.

The versions of the paper that follow are the versions that were submitted during the peer review process. They are not the versions of record or the final published versions. They should not be cited or distributed as the published version of this manuscript.

BMJ Open is an open access journal and the full, final, typeset and author-corrected version of record of the manuscript is available on our site with no access controls, subscription charges or pay-per-view fees (<http://bmjopen.bmj.com>).

If you have any questions on BMJ Open's open peer review process please email [info.bmjopen@bmj.com](mailto:info.bmjopen@bmj.com)

# BMJ Open

## Effectiveness of the e-Tabac Info Service application for smoking cessation: A pragmatic randomised controlled trial

|                               |                                                                                                                                                                                                                                                                                                                                                                                                                                                                                                                                                                                         |
|-------------------------------|-----------------------------------------------------------------------------------------------------------------------------------------------------------------------------------------------------------------------------------------------------------------------------------------------------------------------------------------------------------------------------------------------------------------------------------------------------------------------------------------------------------------------------------------------------------------------------------------|
| Journal:                      | <i>BMJ Open</i>                                                                                                                                                                                                                                                                                                                                                                                                                                                                                                                                                                         |
| Manuscript ID                 | bmjopen-2020-039515                                                                                                                                                                                                                                                                                                                                                                                                                                                                                                                                                                     |
| Article Type:                 | Original research                                                                                                                                                                                                                                                                                                                                                                                                                                                                                                                                                                       |
| Date Submitted by the Author: | 20-Apr-2020                                                                                                                                                                                                                                                                                                                                                                                                                                                                                                                                                                             |
| Complete List of Authors:     | Affret, Aurelie; Université Bordeaux, Population Health Research Center, UMR 1219, CIC-EC 1401<br>Luc, Amandine; CHRU de Nancy<br>Baumann, Cédric; CHRU de Nancy<br>Bergman, Pierre; Caisse nationale de l'assurance maladie<br>Lefaou, Anne Laurence; AP-HP<br>Pasquereau, Anne; Santé publique France<br>Arwidson, Pierre; Sante publique France, Prevention and Health Promotion<br>Alla, François; Bordeaux II University, Population Health Research Center, UMR 1219, CIC-EC 1401<br>Cambon, Linda; Université Bordeaux, Population Health Research Center, UMR 1219, CIC-EC 1401 |
| Keywords:                     | PUBLIC HEALTH, PREVENTIVE MEDICINE, Clinical trials < THERAPEUTICS                                                                                                                                                                                                                                                                                                                                                                                                                                                                                                                      |
|                               |                                                                                                                                                                                                                                                                                                                                                                                                                                                                                                                                                                                         |

SCHOLARONE™  
Manuscripts

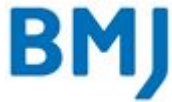

I, the Submitting Author has the right to grant and does grant on behalf of all authors of the Work (as defined in the below author licence), an exclusive licence and/or a non-exclusive licence for contributions from authors who are: i) UK Crown employees; ii) where BMJ has agreed a CC-BY licence shall apply, and/or iii) in accordance with the terms applicable for US Federal Government officers or employees acting as part of their official duties; on a worldwide, perpetual, irrevocable, royalty-free basis to BMJ Publishing Group Ltd ("BMJ") its licensees and where the relevant Journal is co-owned by BMJ to the co-owners of the Journal, to publish the Work in this journal and any other BMJ products and to exploit all rights, as set out in our [licence](#).

The Submitting Author accepts and understands that any supply made under these terms is made by BMJ to the Submitting Author unless you are acting as an employee on behalf of your employer or a postgraduate student of an affiliated institution which is paying any applicable article publishing charge ("APC") for Open Access articles. Where the Submitting Author wishes to make the Work available on an Open Access basis (and intends to pay the relevant APC), the terms of reuse of such Open Access shall be governed by a Creative Commons licence – details of these licences and which [Creative Commons](#) licence will apply to this Work are set out in our licence referred to above.

Other than as permitted in any relevant BMJ Author's Self Archiving Policies, I confirm this Work has not been accepted for publication elsewhere, is not being considered for publication elsewhere and does not duplicate material already published. I confirm all authors consent to publication of this Work and authorise the granting of this licence.

1  
2  
3  
4 Effectiveness of the e-Tabac Info Service application for smoking cessation: A  
5  
6 pragmatic randomised controlled trial  
7  
8  
9  
10

11 Aurélie Affret<sup>1,2,3</sup>, Amandine Luc<sup>4</sup>, Cédric Baumann<sup>4</sup>, Pierre Bergman<sup>5</sup>, Anne-Laurence Le Faou<sup>6,7,8</sup>,  
12 Anne Pasquereau<sup>9</sup>, Pierre Arwidson<sup>9</sup>, François Alla<sup>2,3</sup>, Linda Cambon<sup>1,2,3</sup>.  
13  
14  
15

16  
17 <sup>1</sup> Chaire de prévention ISPED/SPF, Université de Bordeaux, Bordeaux, France

18 <sup>2</sup> Univ. Bordeaux, INSERM, Bordeaux Population Health Research Center, UMR 1219, Bordeaux,  
19 France

20 <sup>3</sup> CHU Bordeaux, Inserm, CIC1401-EC, Bordeaux, France

21 <sup>4</sup> CHRU Nancy, Department of MPI Unit of Methodology, data management and statistic (UMDS),  
22 Vandoeuvre-lès-Nancy, France

23 <sup>5</sup> Caisse nationale de l'Assurance Maladie, Paris, France

24 <sup>6</sup> Societe Francophone de Tabacologie, Paris, France

25 <sup>7</sup> Hôpital Européen Georges Pompidou, APHP. Outpatient Addictology Center, Paris, France

26 <sup>8</sup>. Université de Paris, UMRS 1123, Paris, France

27 <sup>9</sup>. Santé publique France, the french public health agency, Saint Maurice, France  
28  
29  
30  
31  
32  
33  
34  
35

36 Corresponding author:

37 François Alla

38 E-mail: francois.alla@u-bordeaux.fr

39  
40  
41  
42 Tél : (+33) (0)5 57 57 13 93  
43  
44  
45  
46  
47  
48  
49  
50  
51  
52  
53  
54  
55  
56  
57  
58  
59  
60

**Word count: 3993**

## Abstract

**Objective:** To compare the effectiveness of the mobile e-Tabac Info Service (e-TIS) application (app) for helping adult smokers quit smoking with current practices.

**Design:** Pragmatic randomised controlled trial with a 1-year follow-up (2017-2018).

Setting: France, population-wide level.

**Participants:** 2806 adult smokers who wished to quit smoking were recruited via the website of the French National Mandatory Health Insurance fund. Of them, 1400 were randomised to the e-TIS app arm and 1406 were randomised to the current practices arm (control).

**Intervention:** The app involved personalised interactive contacts that included questionnaires, advice, activities, and text messages. All contacts were individually tailored and based on each smoker's progress.

In the control group, recommended practices for quitting smoking were described on a non-interactive website.

**Primary and secondary outcomes measures:** The primary outcome was 7-day point prevalence abstinence (PPA) at 6 months. The secondary outcomes included continuous abstinence rates at 6 and 12 months, minimum 24-hour point abstinence at 3 months, minimum 30-day point abstinence at 12 months, and number and duration of quit attempts.

**Results:** There was no difference between the e-TIS and control arms for the primary outcome (12.6% vs. 13.7% for 7-day PPA at 6 months,  $p = 0.3949$ , intention-to-treat [ITT] analysis). However, e-TIS participants with high levels of exposure to the app, which was defined by the completion of at least eight activities or questionnaires, showed higher rates of smoking cessation than the control participants (17.6% vs. 12.9% for 7-day PPA at 6 months,  $p = 0.0169$ , per-protocol [PP] analysis).

**Conclusion:** Use of the e-TIS app was not associated with a higher rate of smoking cessation. However, high level of exposure to the e-TIS app may have been more effective than current practices. The latest result must be confirmed.

**Trial registration number:** NCT02841683

**Keywords:** Smoking cessation, e-health, internet-based intervention, prevention, mobile phone, effectiveness

### **Strengths and limitations of the present study**

- This was a large, national, pragmatic randomised controlled trial that was conducted under ‘real-life’ conditions.
- This trial occurred during a time period in which there were a variety of national efforts aimed at tobacco prevention in France.
- Results contribute to improving knowledge about the effectiveness of mobile apps as tobacco control interventions.

### **Funding**

This work was supported by the Caisse nationale d’assurance maladie.

### **Data sharing statement**

No additional data available

### **Competing interests**

ALLF reports a grant and conference honoraria from Pfizer, as well as a conference honorarium from J&J that was outside the scope of the submitted work. All other authors have no competing interests to report.

The English in this document has been checked by at least two professional editors, both native speakers of English.

### **Authors’ contributions**

LC and FA managed the scientific coordination of the study, AL performed the statistical analyses, and AA prepared the first draft. Other authors were involved in the study and contributed to the interpretation of the results. All authors reviewed and contributed to the article.

## Introduction

Smoking remains a leading risk factor for early death and disability (1). Thus, there is a need to strengthen support for smoking cessation. In this context, mobile phone applications (apps) are increasingly used and have several advantages in terms of their inexpensiveness, scalability to large populations, interactivity, ability to be used anywhere at any time, to be tailored to individual users, to distract smokers from cravings, and to link users with social support (2). Although several apps for smoking cessation are available only a few are theory- or evidence-based (3,4). Nonetheless, these health apps appear to be used more effectively and for longer periods of time when they offer support that extends beyond motivation maintenance and contributions to self-knowledge (5).

In France, a theory-based app for smoking cessation, the e-intervention Tabac Info Service (e-TIS), has been developed by Santé publique France and the Caisse nationale d'assurance maladie (6). This app was designed to provide support to smokers who wish to quit, including those who are not currently involved in a quit attempt, and was based on the effectiveness criteria of online programmes (7) and psychosocial and behavioural change theories (8–12). The e-TIS app provides tailored activities, self-report exercises, tips, social and/or psychological support, reassurance, and motivational text messages that are adapted to the individual characteristics of the user (13). The present study evaluated the effectiveness of the theory-based smoking cessation e-TIS app in a pragmatic randomised controlled trial conducted in France on a population-wide level.

## Methods

This manuscript was written in accordance with the CONSORT Statement and the EHEALTH checklist (14).

## Study design

The protocol was previously registered (NCT02841683) and published (13). Participants were randomly assigned (1:1) to either the intervention arm (invitation to use the e-TIS app) or the control arm (current practices for smoking cessation described on a non-interactive website from the French National Mandatory Health Insurance [ameli.fr]). The current practices were based on the guidelines of the Haute Autorité de Santé (15). All participants were recruited between February 2017 and April 2018, then followed up over the subsequent 1-year period.

All participants consented to inclusion in the study and an automated randomisation procedure was carried out following the receipt of all inclusion data. A minimisation software package was employed to reduce the risk of unmatched groups and to stratify the participants based on age and sex, using the following parameters: study arm (e-TIS and control, allocated 50/50), sex (male/female), and age ( $\leq 45$  years or  $> 45$  years).

## Study population and sample

When visiting their personal account on the French Mandatory National Health Insurance website, users were invited to participate in the present study via a banner. Users who clicked on the banner were presented with an information sheet, which included a section where they could provide informed consent. The consent form contained the inclusion questionnaire, with the following criteria: 1) adult smoker; 2) completion of the online consent form; 3) agreement to participate in the study; 4) possession of a mobile phone using an iOS or Android system; 5) willingness to use the app; and 6) attempt or consideration of an attempt to quit smoking. If the user provided consent to be enrolled in the study, they were sent an email with a confirmation link. When the participants clicked the confirmation link, they were randomised and invited to fill in the entry questionnaire (T0) for the study.



### **Intervention arm: e-TIS app**

Participants assigned to the intervention arm were invited to download the e-TIS app. In accordance with the relapse prevention model (16,17), the e-TIS app is tailored to each individual smoker based on feedback. Furthermore, the support process in the e-TIS is based on the efficacy criteria of online programmes, which include the frequency and intensity of contacts, short messages, interactivity, appeal, personalisation, credibility of content, and sharing functions (7), as well as various theoretical models that are used for withdrawal treatments (8–12,18).

The e-TIS app involves personalised interactive (push) contacts that include questionnaires, activities, and text messages which are available via mobile phone, the website platform, and tablets. In total, the intervention consists of 16 different activities, eight position questionnaires (to adapt the app content to the evolution of one's willingness to quit or attempt to quit), and a set of roughly 170 email or push-app text messages/notifications with distinct purposes. All contacts are tailored to the answers on the eight position questionnaires and an individual's progress through the four modules of the app. Each participant began the process within a module that was adapted to his/her individual stage regarding tobacco status. The content has been described in detail elsewhere (13). The present study evaluated e-TIS version 2.0.

### **Control arm: Current practices**

Participants assigned to the control arm were invited to visit a pre-existing -website page that listed smoking cessation resources that are readily available in France and recommended by the Haute Autorité de Santé (15).

### **Outcomes and other data**

1  
2  
3 The primary outcome in the present study was point prevalence abstinence (PPA) at the 6-  
4 month follow-up assessment. The PPA for smoking is a minimum of 7 days (19). In general,  
5 the PPA is considered to be the most appropriate measure for evaluating abstinence in  
6 intervention evaluation studies (20).  
7  
8  
9

10  
11 Because a large number of participants were lost to follow-up during the study, and due to the  
12 need to limit the amount of missing data, the original study protocol was modified as follows  
13 before the blinding was lifted: 1) for participants with information regarding smoking status at  
14 12 months but not at 6 months, the 12-month smoking status was used to replace the missing  
15 data regarding smoking status at 6 months; 2) for participants with information regarding  
16 smoking status at 3 months but not at 6 or 12 months, the 3-month smoking status was used to  
17 replace the missing data regarding smoking status at 6 months. Additionally, at the 6-month  
18 follow-up assessment, participants with missing data were phoned and reminded of the study.  
19 This recalculated criterion was used as the primary outcome. Sensitivity analyses were  
20 performed with the original criterion (i.e. without imputations for missing data).  
21  
22  
23  
24  
25  
26  
27  
28  
29  
30  
31  
32  
33  
34

35 Based on previous data and recommendations (2,7,20,21), the secondary outcomes in the  
36 present study included continuous abstinence at 6 months, continuous abstinence at 12  
37 months, minimum 24-hour point abstinence at 3 months, minimum 30-day point abstinence at  
38 12 months, and number and duration of quit attempts. To further characterise tobacco  
39 consumption, the present study also collected data associated with the dependency and  
40 determinants of abstinence, described elsewhere (13).  
41  
42  
43  
44  
45  
46  
47  
48  
49  
50

### 51 **Data collection**

52 Data were collected via internet-based self-report questionnaires at inclusion (technical  
53 variables), study initiation (initial self-reporting questionnaire), and at 3, 6, and 12 months  
54 (three follow-up self-report questionnaires). Application usage data were extracted from the  
55  
56  
57  
58  
59  
60

1  
2  
3 application database and a match with the study data measured whether or not the persons  
4 included in both arms used the application.  
5  
6  
7  
8  
9

## 10 **Statistical analysis**

### 11 *Sample size calculation*

12  
13  
14 The required sample size was calculated based on the hypothesis of a 10% abstinence rate at  
15 6-month follow-up in the control group (22). Given this rate, sample sizes of 1500  
16 participants per group were necessary to show a minimum odds ratio of 1.5 with a power of  
17 90% ( $\alpha = 0.05$ , bilateral test); thus, a total sample size of 3000 individuals was necessary (23).  
18  
19  
20  
21  
22  
23  
24  
25

### 26 *Statistical methods*

27  
28 Statistical analyses were performed for the intention-to-treat (ITT), per-protocol (PP), and as-  
29 treated (AT) populations. The ITT analysis included all participants in the arms to which they  
30 were randomised, regardless of adherence to the prescribed intervention. For the PP and AT  
31 analyses, exposure to the application was defined as the completion of at least one activity or  
32 questionnaire through the app. For the PP analysis, participants in the intervention arm were  
33 defined as those randomised to that arm who completed at least one activity or questionnaire.  
34 Participants in the control arm were defined as those randomised to that arm who did not  
35 complete any activities or questionnaires through the app. For the AT analysis, participants  
36 who completed at least one activity or questionnaire through the app, independent of their  
37 allocation arm, were regarded as those exposed to the intervention. Participants who did not  
38 complete any activities or questionnaires through the application, independent of their  
39 allocation arm, were regarded as non-exposed to the intervention.  
40  
41  
42  
43  
44  
45  
46  
47  
48  
49  
50  
51  
52  
53  
54

55 For the main analysis, participants lost to follow-up (those who did not answer the  
56 questionnaires) were defined as smokers, as previously recommended (7,21,24), whereas the  
57  
58  
59  
60

1  
2  
3 secondary analysis only considered participants who were not lost to follow-up. Multivariate  
4 analyses, adjusted for baseline characteristics, were performed in the PP and AT populations.  
5  
6 To compare the effects of the e-TIS app on smoking cessation in terms of low versus high  
7  
8 levels of e-TIS use, participants were categorised based on median use in the present study:  
9  
10 i.e., the completion of eight activities or questionnaires through the app.  
11  
12

13  
14 Some subgroup analyses were conducted as defined in the study protocol (13). Other  
15  
16 subgroup analyses were added to the initial protocol (before the blinding was lifted): tobacco  
17  
18 status at inclusion and plans to have or adopt a child in the following year. Sensitivity  
19  
20 analyses were performed using only data from participants with a smoking status at 6 months,  
21  
22 without data recovery based on 3-month and/or 12-month smoking status. All statistical  
23  
24 analyses were performed in 2019 using SAS 9.4 Software (SAS Institute; Cary, NC, USA).  
25  
26  
27  
28  
29

### 30 **Ethical considerations**

31  
32 All participants were required to provide informed consent prior to inclusion in the study and  
33  
34 were informed that they could refuse and drop out at any time. The study protocol was  
35  
36 reviewed by the Ethical and Deontological Institutional Review Board of the Institut National  
37  
38 de Veille Sanitaire on 18 April 2016. All recommendations from the committee were  
39  
40 integrated into the amended version of the protocol.  
41  
42  
43  
44  
45  
46

### 47 **Patient and Public Involvement**

48  
49 Patients or the public were not involved in the design, or conduct, or reporting, or  
50  
51 dissemination of our research.  
52  
53  
54  
55

## 56 **Results**

### 57 **Recruitment and baseline characteristics**

58  
59  
60

1  
2  
3 **Figure 1** displays the flow chart of the randomisation and follow-up procedures. A total of  
4  
5 2806 participants with inclusion data were randomised for the present study; of these, 1400  
6  
7 were allocated to the e-TIS arm and 1406 were allocated to the control arm. Based on the  
8  
9 recovery of missing data, 518 and 602 participants were followed up at 6 months in the e-TIS  
10  
11 and control arms, respectively. **Figure 1** shows contamination between the groups.  
12  
13 Specifically, of the 1400 participants in the e-TIS arm, 787 were exposed to the app, whereas  
14  
15 613 participants were considered to not have been exposed to the app. Of the 1406  
16  
17 participants in the control arm, 1127 participants were not exposed to the app, whereas 279  
18  
19 participants were considered to have been exposed to the app. The ITT, PP, and AT  
20  
21 populations used to assess the primary outcome at 6 months in each arm are displayed in  
22  
23 **Figure 1**.

24  
25  
26  
27  
28 The baseline characteristics of the participants and their exposure levels to the e-TIS app are  
29  
30 presented in **Supplementary Table 1**. Of the total participants, most were women, aged 45  
31  
32 years or younger, and current smokers. There were no significant differences between the  
33  
34 groups at baseline.  
35  
36

### 37 38 39 **Primary outcome**

40  
41  
42 There were no differences in PPA at 6 months between the e-TIS and control arms in the ITT,  
43  
44 PP, and AT populations (**Table 1**). When considering only respondents in the total  
45  
46 population, 32.9% and 32.4% of participants were quitters in the ITT/AT and PP populations,  
47  
48 respectively. When considering non-respondents as smokers, 13.1% and 12.9% of the  
49  
50 participants, respectively, were quitters. There were no significant differences in the primary  
51  
52 outcome between participants exposed to the e-TIS and participants not exposed to e-TIS in  
53  
54 the PP and AT populations (**Table 2**).  
55  
56  
57  
58  
59  
60

## Secondary outcomes

There were no significant differences in any of the secondary outcomes between the e-TIS and control arms in the ITT population (**Supplementary Table 2**).

## High level of e-TIS use

**Table 3** presents the group differences in the primary outcome in the PP and AT populations after considering exposure to the e-TIS. In the PP population when considering non-respondents as smokers, 17.6% of participants in the e-TIS high exposure group were quitters, compared to 12.9% in the control group ( $p = 0.0169$ ). In the AT population when considering non-respondents as smokers, 18.2% of the participants in the e-TIS high exposure group were quitters, compared to 11.8% in the other group ( $p < 0.0001$ ).

## Sensitivity analysis

Sensitivity analyses were performed using participants with data at 6 months (no recovery data were used); **Supplementary Figure 1** presents the corresponding diagram flow. These results were similar to those of the main analysis (**Supplementary Table 3**).

## Subgroup analyses

**Supplementary Figure 2** illustrates the subgroup analyses performed using the ITT population, which considered non-respondents as smokers. There were no differences in the minimum 7-day PPA between the e-TIS and control arms in any of the identified subgroups. Similar results were obtained in the ITT population when only respondents were considered, as well as in the PP and AT populations (both cases: non-respondents were considered as smokers and only considering respondents) with the following exceptions. In the AT population and among smokers at inclusion, quitters were overrepresented among the e-TIS

1  
2  
3 participants, relative to participants who were not exposed to the e-TIS. Therefore, when  
4  
5 considering non-respondents as smokers, 11.2% (n = 80) of the e-TIS participants were  
6  
7 quitters, compared to 8.0% (n = 93) of the participants who were not exposed to the e-TIS (p  
8  
9 = 0.0193; data not shown). Similar results were obtained when analyses were performed using  
10  
11 participants with no recovery data at 6 months in the ITT, PP, and AT populations (both  
12  
13 cases; data not shown).  
14  
15  
16  
17  
18

## 19 Discussion

20  
21 The present study evaluated the effectiveness of the theory-based smoking cessation e-TIS  
22  
23 app. As expected, the participants were mostly young and had a high level of education (25),  
24  
25 which is consistent with the nature of the digital intervention (26). Furthermore, more women  
26  
27 agreed to participate. Similar rates of female participants were observed in the trials reviewed  
28  
29 by Whittaker et al. (2) that employed similar methods of inclusion (27–29).  
30  
31

32  
33 The present study also revealed a high rate of smoking cessation among all participants.  
34  
35 Notably, the rates observed in this study were higher than those in a previous French trial that  
36  
37 evaluated the previous TIS modality, which employed email coaching (32.9% in present  
38  
39 study vs. 24.7%) (30). When considering non-respondents as smokers, 12.6% and 13.7% of  
40  
41 participants in the e-TIS and control arms, respectively, were quitters. Previous studies have  
42  
43 reported that 9% of intervention group populations and 5-6% of control group populations are  
44  
45 quitters (2). It is important to note that the control arm in the present study may not have been  
46  
47 considered a true control arm; importantly, the original e-TIS protocol submitted to the ethical  
48  
49 committee planned to compare the e-TIS arm with a control arm (no intervention other than  
50  
51 standard practices). However, the committee suggested that the control participants be  
52  
53 exposed to best evidence-based practices currently in use (15). Thus, the Quitting page of the  
54  
55 French National Mandatory Health Insurance website (Ameli) was suggested to the control  
56  
57  
58  
59  
60

1  
2  
3 participants, and some of these participants may have used the various smoking cessation  
4 resources which are all considered to be effective. For example, at 6 months, 36.4% of  
5 participants in the control arm had used nicotine replacement therapies within the previous 3  
6 months.  
7  
8  
9

10  
11  
12 The present study also revealed a lack of differences between the e-TIS and control arms in  
13 the ITT, PP, and AT populations. In a Cochrane systematic review conducted in 2014,  
14 Whittaker et al. (2) concluded that mobile phone-based smoking cessation interventions had a  
15 beneficial impact on 6-month outcomes (relative risk [RR]: 1.67, 95% confidence interval  
16 [CI]: 1.46 to 1.90;  $I^2 = 59%$ ; 12 studies included). However, most studies included in that  
17 review employed short message service text messaging-based interventions, rather than  
18 complex apps; notably, more complex apps use text messaging and other forms of contact.  
19 Therefore, direct comparisons between these results may be inappropriate.  
20  
21  
22  
23  
24  
25  
26  
27  
28  
29

30  
31 Similar to the findings of recent studies that investigated the effectiveness of complex apps  
32 (31,32), the present results showed that the results in the intervention and control arms did not  
33 differ at 6 months. Baskerville et al. (31) compared the effectiveness of an evidence-informed  
34 self-help guide with a non-intervention arm, which may explain the absence of differences in  
35 both arms, and Garrison et al. (32). evaluated a mindfulness training app. Although there were  
36 no group differences in smoking abstinence at 6 months, the intervention app reduced the  
37 associations between craving and smoking, compared to the control app. In contrast, BinDhim  
38 et al. (33) reported that individuals exposed to a smartphone-based decision aid were  
39 significantly more likely to exhibit continuous abstinence at 6 months than those exposed to  
40 an information-only app. In that study, the intervention app was required to display  
41 information regarding quitting options, whereas the control app was not required to display  
42 this information.  
43  
44  
45  
46  
47  
48  
49  
50  
51  
52  
53  
54  
55  
56  
57  
58  
59  
60



1  
2  
3 Furthermore, Brown et al. (22) found that the StopAdvisor app was more effective than an  
4 information-only website for helping participants with a low socioeconomic status stop  
5 smoking; it is important to note that this study was designed with sufficient power to  
6 separately assess effectiveness within each socioeconomic status subsample. In the present  
7 study, there were no differences according to socioeconomic status, based on the reported  
8 level of education. Additionally, in the StopAdvisor study, the authors noted that the control  
9 website was used less regularly than the StopAdvisor website in terms of logins, page views,  
10 and time spent on the website. At the 6-month follow-up assessment in the present study,  
11 several of the control participants reported that they had been using other forms of smoking  
12 cessation support in the 3 previous months (e.g., use of nicotine replacement therapies and/or  
13 consultation with a healthcare professional). This could explain the high smoking cessation  
14 rate in the present control group (13.7%) versus that in the StopAdvisor study (10%).

15 Moreover, the effects of health apps remain controversial because they are influenced by  
16 numerous factors related to the app components, characteristics of the users (e.g., motivation,  
17 previous attempts to quit, and uniformity), and the environment of the participant (e.g., social  
18 support). As a result, some authors have advocated for the use of process evaluations to  
19 complement the effectiveness evaluations when assessing this 'black box' (5,34,35).

20 The present study also found that the numbers of quitters in the PP and AT populations at 6  
21 months were higher among participants exposed to the e-TIS, compared to those not exposed  
22 to the app, when e-TIS exposure was defined as the completion of at least eight activities  
23 and/or questionnaires (i.e., the median exposure). It is tempting to conclude that the e-TIS  
24 was effective if used intensively, which would be consistent with previous results on the  
25 relationship between use frequency and efficacy (5,36). However, it is likely that the most  
26 motivated participants used the app for a longer time; this motivation, rather than the duration  
27 or frequency of use, would have improved the results. This idea is consistent with the findings

1  
2  
3 of prior studies, in which the most motivated people were those who used the apps more  
4 frequently (5,37). In the same way it is possible that it is a feed-back loop between  
5 engagement and effectiveness (38). However, in our population, there is no relationship  
6  
7 between motivation at inclusion and subsequent use (data not shown), which is an argument  
8  
9 for the effectiveness of exposure to the application. That remains to be confirmed.  
10  
11  
12  
13  
14  
15  
16

### 17 *Strengths and limitations*

18  
19 This study was a randomised controlled trial under pragmatic conditions, which enabled  
20 evaluation of the effectiveness of the e-TIS in real-life situations. The primary outcome was  
21 point prevalence abstinence (PPA) at 6-month. This duration of follow-up is the one  
22 recommended for cessation trials (24). We had a 12-month measure, but decided not to make  
23 it the primary outcome because the rate of loss of follow-up at one year was predictably high,  
24 especially for an e-intervention. PPA is considered to be the most appropriate measure for  
25 evaluating abstinence in intervention evaluation studies (20). In fact, the continuous  
26 abstinence, recommended in clinical trials (24) is not relevant in this context because a  
27 planned cessation date is not a criterion for inclusion and patients could stop smoking at any  
28 time during follow-up. However, we have retained it as a secondary outcome and results  
29 remained unchanged with this outcome. Similarly, our imputation procedures to account for  
30 missing data did not change the results as shown in the sensitivity analyses.  
31  
32  
33  
34  
35  
36  
37  
38  
39  
40  
41  
42  
43  
44  
45

46 There was a high rate of attrition, that is quite common in investigations of mHealth tools  
47 (39,40). This rate was also likely due to the pragmatic conditions of the trial, as well as the  
48 ease of enrolment in the study.  
49  
50  
51  
52

53 Furthermore, the present findings may have been influenced by high levels of contamination  
54 between the study arms due to the unrestricted availability of the e-TIS from app stores during  
55  
56  
57  
58  
59  
60

1  
2  
3 the trial. Finally, the dose-response analysis was not possible for control arm for obvious  
4 reasons.  
5  
6

## 7 **Conclusions**

8  
9  
10 In the present study, the smoking cessation rates were high and there were no differences  
11 between the arms. However, high level of exposure to the e-TIS app may have been more  
12 effective than current practices. Because the present results may be explained by multiple  
13 hypotheses, the next step consists of the performance of a process evaluation (41) using  
14 behavioural change techniques taxonomy (42,43), in order to better understand the e-TIS  
15 mechanisms and conditions involved in its efficacy.  
16  
17  
18  
19  
20  
21  
22  
23  
24  
25

## 26 **Authors' contributions**

27  
28 LC and FA managed the scientific coordination of the study, AL performed the statistical  
29 analyses, and AA prepared the first draft. Other authors were involved in the study and  
30 contributed to the interpretation of the results. All authors reviewed and contributed to the  
31 article.  
32  
33  
34  
35  
36  
37  
38  
39  
40

## 41 **References**

- 42  
43  
44 1. GBD 2015 Tobacco Collaborators. Smoking prevalence and attributable disease  
45 burden in 195 countries and territories, 1990-2015: a systematic analysis from the Global  
46 Burden of Disease Study 2015. *Lancet Lond Engl*. 2017 May 13;389(10082):1885–906.
- 47 2. Whittaker R, McRobbie H, Bullen C, Rodgers A, Gu Y. Mobile phone-based  
48 interventions for smoking cessation. *Cochrane Database Syst Rev*. 2016 Apr 10;4:CD006611.
- 49 3. Haskins BL, Lesperance D, Gibbons P, Boudreaux ED. A systematic review of  
50 smartphone applications for smoking cessation. *Transl Behav Med*. 2017;7(2):292–9.
- 51 4. Ubhi HK, Kotz D, Michie S, et al. Comparative analysis of smoking cessation  
52 smartphone applications available in 2012 versus 2014. *Addict Behav*. 2016 Jul;58:175–81.
- 53 5. Aromatario O, Van Hoye A, Vuillemin A, et al. How do mobile health applications  
54 support behaviour changes? A scoping review of mobile health applications relating to  
55 physical activity and eating behaviours. *Public Health*. 2019 Oct 1;175:8–18.
- 56 6. Tabac Info Service. Webpage for e-TIS intervention downloading. [Internet]. [cited  
57 2019 Sep 16]. Available from: <https://www.tabac-info-service.fr/J-arrete-de-fumer/Je-telecharge-l-ecoaching>  
58  
59  
60

- 1
- 2
- 3 7. Civljak M, Stead LF, Hartmann-Boyce J, Sheikh A, Car J. Internet-based interventions
- 4 for smoking cessation. *Cochrane Database Syst Rev.* 2013 Jul 10;(7):CD007078.
- 5 8. Prochaska JO, DiClemente CC. Stages of change in the modification of problem
- 6 behaviors. *Prog Behav Modif.* 1992;28:183–218.
- 7 9. Bandura A. Human agency in social cognitive theory. *Am Psychol.* 1989
- 8 Sep;44(9):1175–84.
- 9 10. Miller WR, Rollnick S. *Motivational interviewing: preparing people for change.*
- 10 Guildford Press; 2002. 456 p.
- 11 11. Miller WR, Rose GS. Toward a Theory of Motivational Interviewing. *Am Psychol.*
- 12 2009 Sep;64(6):527–37.
- 13 12. Janis IL, Mann L. Emergency decision making: a theoretical analysis of responses to
- 14 disaster warnings. *J Human Stress.* 1977 Jun;3(2):35–45.
- 15 13. Cambon L, Bergman P, Le Faou A, et al. Study protocol for a pragmatic randomised
- 16 controlled trial evaluating efficacy of a smoking cessation e-'Tabac Info Service': ee-TIS
- 17 trial. *BMJ Open.* 2017 24;7(2):e013604.
- 18 14. Eysenbach G, Group C-E. CONSORT-EHEALTH: Improving and Standardizing
- 19 Evaluation Reports of Web-based and Mobile Health Interventions. *J Med Internet Res.*
- 20 2011;13(4):e126.
- 21 15. Haute Autorité de Santé. Arrêt de la consommation de tabac: du dépistage individuel
- 22 au maintien de l'abstinence ne premier recours. Recommandations [Internet]. 2014 Oct [cited
- 23 2017 Feb 7]. Available from: [https://www.has-](https://www.has-sante.fr/portail/upload/docs/application/pdf/2014-11/recommandations_-_arret_de_la_consommation_de_tabac_octobre_2014_2014-11-17_14-13-23_985.pdf)
- 24 [sante.fr/portail/upload/docs/application/pdf/2014-11/recommandations\\_-](https://www.has-sante.fr/portail/upload/docs/application/pdf/2014-11/recommandations_-_arret_de_la_consommation_de_tabac_octobre_2014_2014-11-17_14-13-23_985.pdf)
- 25 [\\_arret\\_de\\_la\\_consommation\\_de\\_tabac\\_octobre\\_2014\\_2014-11-17\\_14-13-23\\_985.pdf](https://www.has-sante.fr/portail/upload/docs/application/pdf/2014-11/recommandations_-_arret_de_la_consommation_de_tabac_octobre_2014_2014-11-17_14-13-23_985.pdf)
- 26 16. Marlatt GA, Gordon J. Determinants of relapse: Implications for the maintenance of
- 27 behavior change. In: *Behavioral Medicine: Changing health lifestyles.* New York:
- 28 Brunner/Mazel. Davidson PO, Davidson SM.; 1980. p. 410–52.
- 29 17. Hendershot CS, Witkiewitz K, George WH, Marlatt GA. Relapse prevention for
- 30 addictive behaviors. *Subst Abuse Treat Prev Policy.* 2011 Jul 19;6:17.
- 31 18. Beaugard L, Dumont S. La mesure du soutien social. *Serv Soc;* 1996.
- 32 19. Velicer WF, Prochaska JO, Rossi JS, Snow MG. Assessing outcome in smoking
- 33 cessation studies. *Psychol Bull.* 1992 Jan;111(1):23–41.
- 34 20. Hughes JR, Keely JP, Niaura RS, Ossip-Klein DJ, Richmond RL, Swan GE. Measures
- 35 of abstinence in clinical trials: issues and recommendations. *Nicotine Tob Res Off J Soc Res*
- 36 *Nicotine Tob.* 2003 Feb;5(1):13–25.
- 37 21. European Medicines Agency. Guideline on Treatment of Smoking [Internet]. 2009
- 38 [cited 2018 Feb 7]. Available from:
- 39 [http://www.ema.europa.eu/docs/en\\_GB/document\\_library/Scientific\\_guideline/2009/09/WC5](http://www.ema.europa.eu/docs/en_GB/document_library/Scientific_guideline/2009/09/WC500003509.pdf)
- 40 [00003509.pdf](http://www.ema.europa.eu/docs/en_GB/document_library/Scientific_guideline/2009/09/WC500003509.pdf)
- 41 22. Brown J, Michie S, Geraghty AWA, et al. Internet-based intervention for smoking
- 42 cessation (StopAdvisor) in people with low and high socioeconomic status: a randomised
- 43 controlled trial. *Lancet Respir Med.* 2014 Dec;2(12):997–1006.
- 44 23. Dupont WD, Plummer WD. Power and sample size calculations. A review and
- 45 computer program. *Control Clin Trials.* 1990 Apr;11(2):116–28.
- 46 24. West R, Hajek P, Stead L, Stapleton J. Outcome criteria in smoking cessation trials:
- 47 proposal for a common standard. *Addict Abingdon Engl.* 2005 Mar;100(3):299–303.
- 48 25. Guignard R, Richard J, Pasquereau A, et al. Tentatives d'arrêt du tabac au dernier
- 49 trimestre 2016 et lien avec Mois sans tabac : premiers résultats observés dans le Baromètre
- 50 santé 2017. *Bull Epidémiol Hebd.* 2018;298–303.
- 51 26. Krebs P, Duncan DT. Health App Use Among US Mobile Phone Owners: A National
- 52 Survey. *JMIR MHealth UHealth [Internet].* 2015 Nov 4;3(4). Available from:
- 53
- 54
- 55
- 56
- 57
- 58
- 59
- 60

- 1  
2  
3 <https://www.ncbi.nlm.nih.gov/pmc/articles/PMC4704953/>
- 4 27. Balmford J, Borland R, Benda P, Howard S. Factors associated with use of automated  
5 smoking cessation interventions: findings from the eQuit study. *Health Educ Res.* 2013  
6 Apr;28(2):288–99.
- 7 28. Abrams LC, Boal AL, Simmens SJ, Mendel JA, Windsor RA. A randomized trial of  
8 Text2Quit: a text messaging program for smoking cessation. *Am J Prev Med.* 2014  
9 Sep;47(3):242–50.
- 10 29. Bock B, Heron K, Jennings E, et al. A Text Message Delivered Smoking Cessation  
11 Intervention: The Initial Trial of TXT-2-Quit: Randomized Controlled Trial. *JMIR MHealth*  
12 *UHealth* [Internet]. 2013 Jul 30;1(2). Available from:  
13 <https://www.ncbi.nlm.nih.gov/pmc/articles/PMC4114437/>
- 14 30. Nguyen Thanh V, Guignard R, Lancrenon S, et al. Effectiveness of a Fully Automated  
15 Internet-Based Smoking Cessation Program: A Randomized Controlled Trial (STAMP).  
16 *Nicotine Tob Res Off J Soc Res Nicotine Tob.* 2019 04;21(2):163–72.
- 17 31. Baskerville NB, Struik LL, Guindon GE, et al. Effect of a Mobile Phone Intervention  
18 on Quitting Smoking in a Young Adult Population of Smokers: Randomized Controlled Trial.  
19 *JMIR MHealth UHealth.* 2018 Oct 23;6(10):e10893.
- 20 32. Garrison KA, Pal P, O'Malley SS, et al. Craving to Quit: A Randomized Controlled  
21 Trial of Smartphone app-based Mindfulness Training for Smoking Cessation. *Nicotine Tob*  
22 *Res Off J Soc Res Nicotine Tob.* 2018 Jun 18;
- 23 33. BinDhim NF, McGeechan K, Trevena L. Smartphone Smoking Cessation Application  
24 (SSC App) trial: a multicountry double-blind automated randomised controlled trial of a  
25 smoking cessation decision-aid 'app'. *BMJ Open.* 2018 21;8(1):e017105.
- 26 34. Cambon L. Health smart devices and applications...towards a new model of  
27 prevention? *Eur J Public Health.* 2017 Jun 1;27(3):390–1.
- 28 35. Petit A, Cambon L. Exploratory study of the implications of research on the use of  
29 smart connected devices for prevention: a scoping review. *BMC Public Health* [Internet].  
30 2016 Jul 11 [cited 2019 Sep 16];16. Available from:  
31 <https://www.ncbi.nlm.nih.gov/pmc/articles/PMC4940750/>
- 32 36. Vaghefi I, Tulu B. The Continued Use of Mobile Health Apps: Insights From a  
33 Longitudinal Study. *JMIR MHealth UHealth.* 2019;7(8):e12983.
- 34 37. Brown J, Michie S, Raupach T, West R. Prevalence and Characteristics of Smokers  
35 Interested in Internet-Based Smoking Cessation Interventions: Cross-sectional Findings From  
36 a National Household Survey. *J Med Internet Res.* 2013;15(3):e50.
- 37 38. Perski O, Blandford A, West R, Michie S. Conceptualising engagement with digital  
38 behaviour change interventions: a systematic review using principles from critical interpretive  
39 synthesis. *Transl Behav Med.* 2017 Jun;7(2):254-267.
- 40 39. Gordon JS, Armin J, D. Hingle M, et al. Development and evaluation of the See Me  
41 Smoke-Free multi-behavioral mHealth app for women smokers. *Transl Behav Med.* 2017  
42 Jun;7(2):172–84.
- 43 40. Pellegrini CA, Verba SD, Otto AD, Helsel DL, Davis KK, Jakicic JM. The  
44 comparison of a technology-based system and an in-person behavioral weight loss  
45 intervention. *Obes Silver Spring Md.* 2012 Feb;20(2):356–63.
- 46 41. Craig P, Dieppe P, Macintyre S, et al. Developing and evaluating complex  
47 interventions: the new Medical Research Council guidance. *BMJ.* 2008 Sep 29;337:a1655.
- 48 42. Michie S, Wood CE, Johnston M, Abraham C, Francis JJ, Hardeman W. Behaviour  
49 change techniques: the development and evaluation of a taxonomic method for reporting and  
50 describing behaviour change interventions (a suite of five studies involving consensus  
51 methods, randomised controlled trials and analysis of qualitative data). *Health Technol Assess*  
52 *Winch Engl.* 2015 Nov;19(99):1–188.
- 53  
54  
55  
56  
57  
58  
59  
60

1  
2  
3 43. Michie S, Richardson M, Johnston M, et al. The behavior change technique taxonomy  
4 (v1) of 93 hierarchically clustered techniques: building an international consensus for the  
5 reporting of behavior change interventions. *Ann Behav Med Publ Soc Behav Med*. 2013  
6 Aug;46(1):81–95.  
7  
8  
9  
10  
11  
12  
13  
14  
15  
16  
17  
18  
19  
20  
21  
22  
23  
24  
25  
26  
27  
28  
29  
30  
31  
32  
33  
34  
35  
36  
37  
38  
39  
40  
41  
42  
43  
44  
45  
46  
47  
48  
49  
50  
51  
52  
53  
54  
55  
56  
57  
58  
59  
60

For peer review only

**Table 1:** Between-group differences in the primary outcome (minimum of 7-day PPA at 6 months) in the ITT, PP, and AT analyses.

| ITT POPULATION                                                 |                   |      |                              |      |                                                 |      |        |
|----------------------------------------------------------------|-------------------|------|------------------------------|------|-------------------------------------------------|------|--------|
|                                                                | Total<br>n = 2806 |      | e-TIS<br>n = 1400<br>(49.9%) |      | Control<br>n = 1406<br>(50.1%)                  |      | p*     |
|                                                                | n                 | %    | n                            | %    | n                                               | %    |        |
| <b>Minimum of 7-day PPA at 6 months (n = 1120)<sup>1</sup></b> |                   |      |                              |      |                                                 |      | 0.4593 |
| Smokers                                                        | 752               | 67.1 | 342                          | 66.0 | 410                                             | 68.1 |        |
| Quitters                                                       | 368               | 32.9 | 176                          | 34.0 | 192                                             | 31.9 |        |
| <b>Minimum of 7-day PPA at 6 months (n = 2806)<sup>2</sup></b> |                   |      |                              |      |                                                 |      | 0.3949 |
| Smokers                                                        | 2438              | 86.9 | 1224                         | 87.4 | 1214                                            | 86.3 |        |
| Quitters                                                       | 368               | 13.1 | 176                          | 12.6 | 192                                             | 13.7 |        |
| PP POPULATION                                                  |                   |      |                              |      |                                                 |      |        |
|                                                                | Total<br>n = 1914 |      | e-TIS<br>n = 787<br>(41.1%)  |      | Control<br>n = 1127<br>(58.9%)                  |      | p*     |
|                                                                | n                 | %    | n                            | %    | n                                               | %    |        |
| <b>Minimum of 7-day PPA at 6 months (n = 759)<sup>1</sup></b>  |                   |      |                              |      |                                                 |      | 0.2196 |
| Smokers                                                        | 513               | 67.6 | 191                          | 65.0 | 322                                             | 69.2 |        |
| Quitters                                                       | 246               | 32.4 | 103                          | 35.0 | 143                                             | 30.8 |        |
| <b>Minimum of 7-day PPA at 6 months (n = 1914)<sup>2</sup></b> |                   |      |                              |      |                                                 |      | 0.7974 |
| Smokers                                                        | 1668              | 87.1 | 684                          | 86.9 | 984                                             | 87.3 |        |
| Quitters                                                       | 246               | 12.9 | 103                          | 13.1 | 143                                             | 12.7 |        |
| AT POPULATION                                                  |                   |      |                              |      |                                                 |      |        |
|                                                                | Total<br>n = 2806 |      | e-TIS<br>n = 1066<br>(38.0%) |      | Non-exposure<br>to e-TIS<br>n = 1740<br>(62.0%) |      | p*     |
|                                                                | n                 | %    | n                            | %    | n                                               | %    |        |
| <b>Minimum of 7-day PPA at 6 months (n = 1120)<sup>1</sup></b> |                   |      |                              |      |                                                 |      | 0.1745 |
| Smokers                                                        | 752               | 67.1 | 279                          | 64.7 | 473                                             | 68.7 |        |
| Quitters                                                       | 368               | 32.9 | 152                          | 35.3 | 216                                             | 31.3 |        |
| <b>Minimum of 7-day PPA at 6 months (n = 2806)<sup>2</sup></b> |                   |      |                              |      |                                                 |      | 0.1599 |
| Smokers                                                        | 2438              | 86.9 | 914                          | 85.7 | 1524                                            | 87.6 |        |
| Quitters                                                       | 368               | 13.1 | 152                          | 14.3 | 216                                             | 12.4 |        |

<sup>1</sup> Only respondents considered<sup>2</sup> Non-respondents considered as smokers

\* Chi-squared test

e-TIS, e-intervention Tabac Info Service; PPA, point prevalence abstinence

**Table 2:** Minimum of 7-day PPA in the PP and AT populations (multivariate analysis).

|                                                                              | n    | Minimum 7-day PPA at 6 months |      | Multivariate regression <sup>1</sup> |             |        |         |
|------------------------------------------------------------------------------|------|-------------------------------|------|--------------------------------------|-------------|--------|---------|
|                                                                              |      | Quitters                      | %    | Odds ratio                           | CI 95%      |        | p-value |
|                                                                              |      |                               |      |                                      | Lower       | Upper  |         |
| <b>PP POPULATION</b>                                                         |      |                               |      |                                      |             |        |         |
| <b>Only considering respondents (n = 743/759<sup>2</sup>) §</b>              |      |                               |      |                                      |             |        |         |
| Control                                                                      | 453  | 138                           | 30.5 | 1                                    |             | 0.2140 |         |
| e-TIS exposure                                                               | 290  | 102                           | 35.2 | 1.22                                 | 0.89 - 1.67 |        |         |
| <b>Considering non-respondents as smokers (n = 1831/1914<sup>2</sup>) §§</b> |      |                               |      |                                      |             |        |         |
| Non-exposure to e-TIS                                                        | 1080 | 132                           | 12.2 | 1                                    |             | 0.6689 |         |
| e-TIS exposure                                                               | 751  | 99                            | 13.2 | 1.06                                 | 0.80 - 1.41 |        |         |
| <b>AT POPULATION</b>                                                         |      |                               |      |                                      |             |        |         |
| <b>Only considering respondents (n = 1095/1120<sup>2</sup>) §</b>            |      |                               |      |                                      |             |        |         |
| Non-exposure to e-TIS                                                        | 671  | 210                           | 31.3 | 1                                    |             | 0.1882 |         |
| e-TIS exposure                                                               | 424  | 150                           | 35.4 | 1.19                                 | 0.92 - 1.54 |        |         |
| <b>Considering non-respondents as smokers (n = 2679/2806<sup>2</sup>) §§</b> |      |                               |      |                                      |             |        |         |
| Non-exposure to e-TIS                                                        | 1660 | 202                           | 12.2 | 1                                    |             | 0.1449 |         |
| e-TIS exposure                                                               | 1019 | 146                           | 14.3 | 1.19                                 | 0.94 - 1.49 |        |         |

<sup>1</sup> Adjusted for baseline characteristics, with the exception of tobacco status at inclusion. The stepwise variable selection method was used with an input threshold in the model at 0.2 and an output threshold in the model at 0.05. Only factors with a significant association with the 0.2 threshold in the bivariate model were candidates in the multivariate model.

<sup>2</sup> Due to missing data regarding the variables considered in the multivariate model

§ retained variables: expecting a child

§§ retained variables: family situation, level of education, treatment for cardiovascular or respiratory diseases

CI, Confidence interval



**Table 3:** Between-group differences in the primary outcome in the PP and AT populations, which considered exposure to be the completion of at least eight activities or questionnaires through the application.

| PP POPULATION                                               |                   |      |                                                   |      |                                                 |      |                    |
|-------------------------------------------------------------|-------------------|------|---------------------------------------------------|------|-------------------------------------------------|------|--------------------|
|                                                             | Total<br>n = 1652 |      | e-TIS exposure <sup>1</sup><br>n = 409<br>(24.8%) |      | Control<br>n = 1243<br>(75.2%)                  |      | <i>p</i> -value*   |
|                                                             | n                 | %    | n                                                 | %    | n                                               | %    |                    |
| <b>Minimum 7-day PPA at 6 months (n = 704)<sup>2</sup></b>  |                   |      |                                                   |      |                                                 |      | <b>0.0139</b>      |
| Smokers                                                     | 472               | 67.0 | 106                                               | 59.6 | 366                                             | 69.6 |                    |
| Quitters                                                    | 232               | 33.0 | 72                                                | 40.4 | 160                                             | 30.4 |                    |
| <b>Minimum 7-day PPA at 6 months (n = 1652)<sup>2</sup></b> |                   |      |                                                   |      |                                                 |      | <b>0.0169</b>      |
| Smokers                                                     | 1420              | 86.0 | 337                                               | 82.4 | 1083                                            | 87.1 |                    |
| Quitters                                                    | 232               | 14.0 | 72                                                | 17.6 | 160                                             | 12.9 |                    |
| AT POPULATION                                               |                   |      |                                                   |      |                                                 |      |                    |
|                                                             | Total<br>n = 2806 |      | e-TIS exposure <sup>1</sup><br>n = 572<br>(20.4%) |      | Non-exposure<br>to e-TIS<br>n = 2234<br>(79.6%) |      | <i>p</i> -value*   |
|                                                             | n                 | %    | n                                                 | %    | n                                               | %    |                    |
| <b>Minimum 7-day PPA at 6 months (n = 1120)<sup>2</sup></b> |                   |      |                                                   |      |                                                 |      | <b>0.0018</b>      |
| Smokers                                                     | 752               | 67.1 | 150                                               | 59.1 | 602                                             | 69.5 |                    |
| Quitters                                                    | 368               | 32.9 | 104                                               | 40.9 | 264                                             | 30.5 |                    |
| <b>Minimum 7-day PPA at 6 months (n = 2806)<sup>3</sup></b> |                   |      |                                                   |      |                                                 |      | <b>&lt; 0.0001</b> |
| Smokers                                                     | 2438              | 86.9 | 468                                               | 81.8 | 1970                                            | 88.2 |                    |
| Quitters                                                    | 368               | 13.1 | 104                                               | 18.2 | 264                                             | 11.8 |                    |

<sup>1</sup> Completed at least eight activities or questionnaires through the application

<sup>2</sup> Only respondents considered

<sup>3</sup> Non-respondents considered as smokers

\* Chi-squared test

e-TIS, e-intervention Tabac Info Service; PPA, point prevalence abstinence

1  
2  
3 **Figures legends**  
4  
5

6 Figure 1: Diagram depicting the flow of participants in the study (n = 2806).  
7  
8  
9  
10  
11  
12  
13  
14  
15  
16  
17  
18  
19  
20  
21  
22  
23  
24  
25  
26  
27  
28  
29  
30  
31  
32  
33  
34  
35  
36  
37  
38  
39  
40  
41  
42  
43  
44  
45  
46  
47  
48  
49  
50  
51  
52  
53  
54  
55  
56  
57  
58  
59  
60

For peer review only

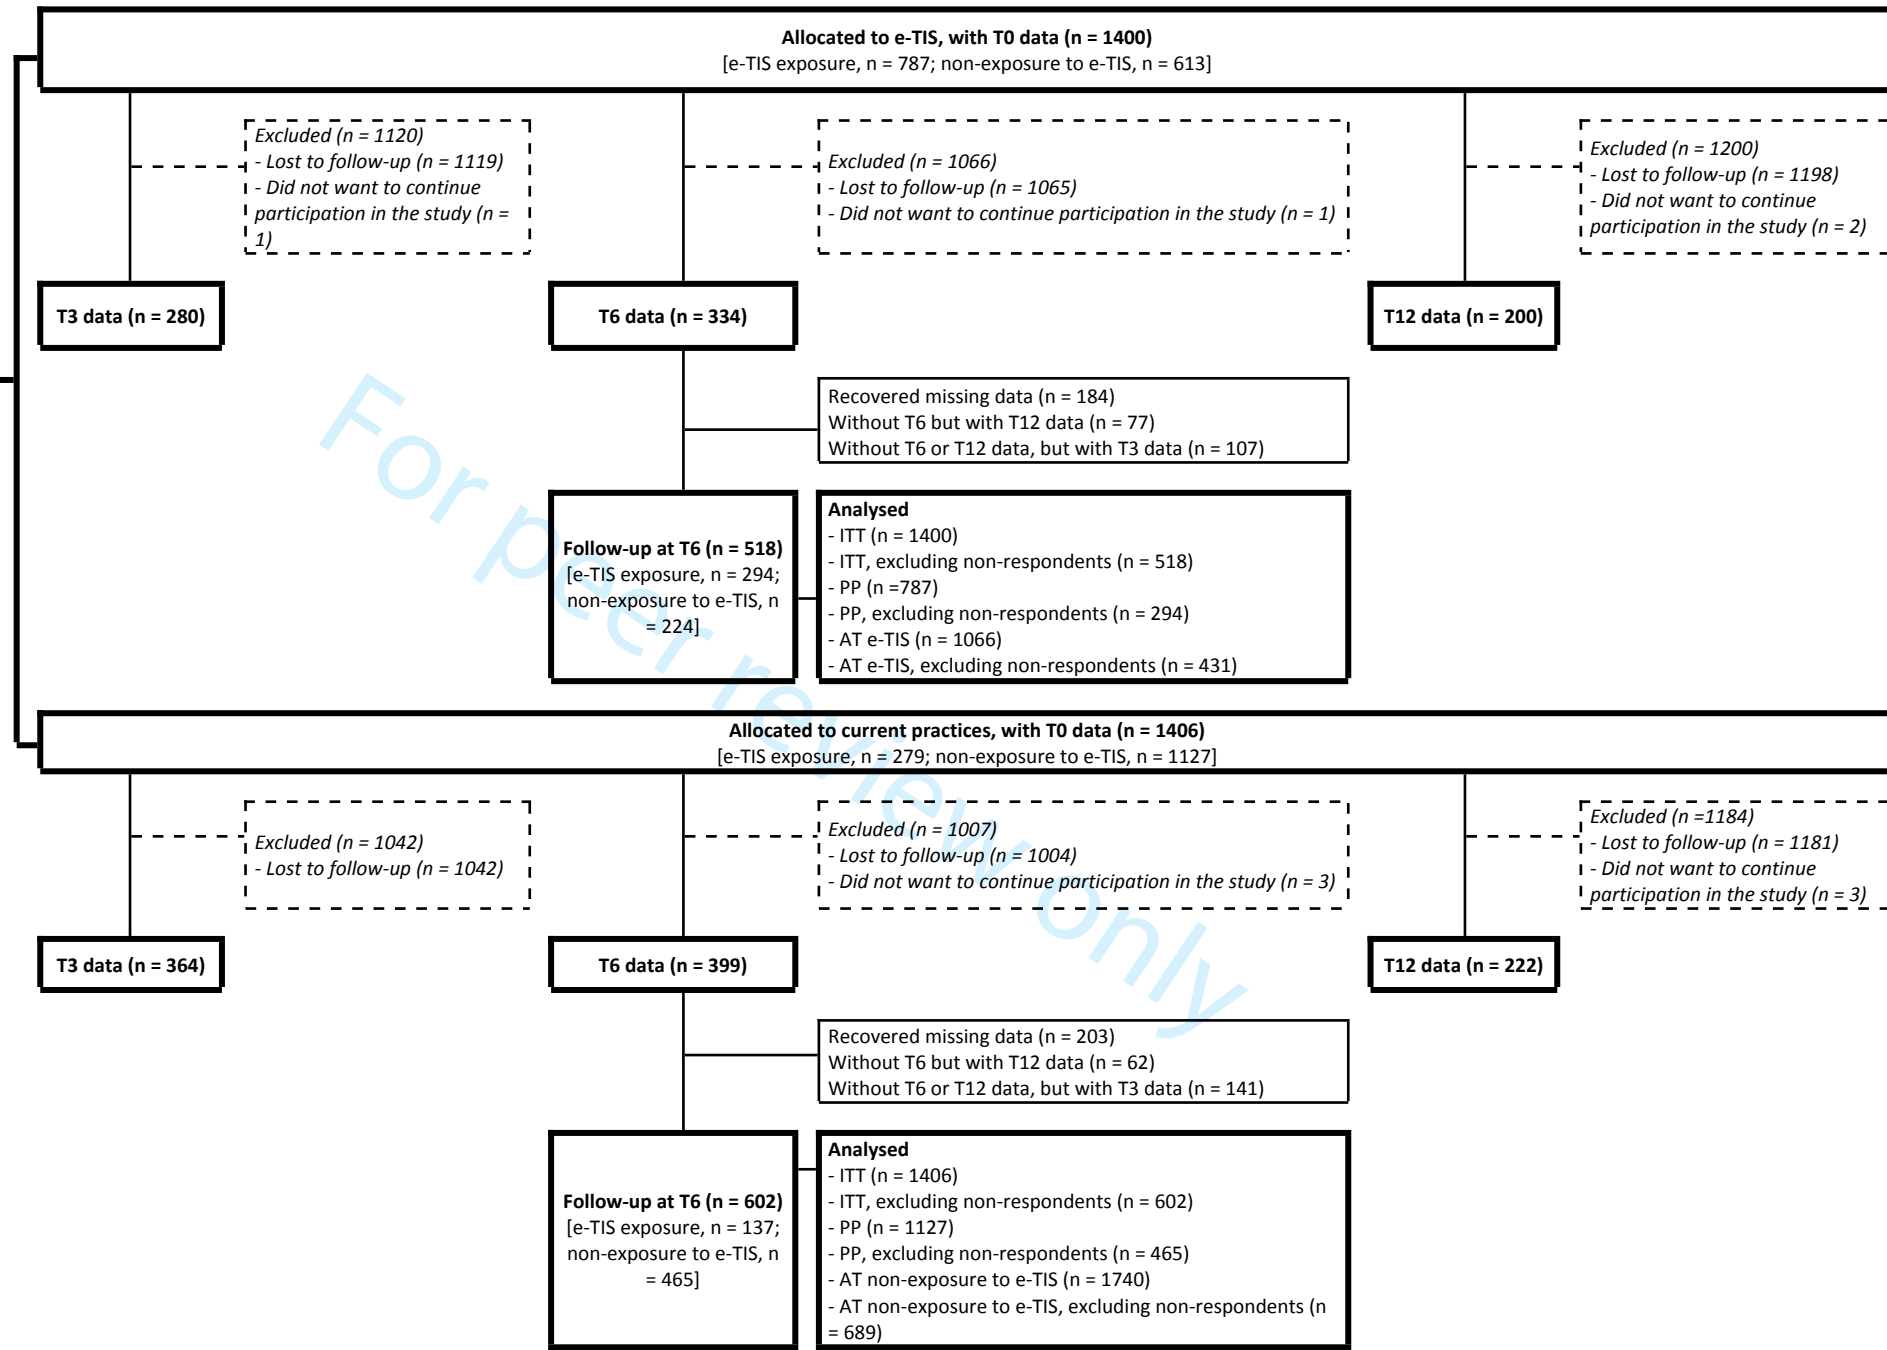

10 Participants with inclusion  
11 data, randomised (n = 2806)  
12

1  
2  
3  
4  
5  
6  
7  
8  
9  
10  
11  
12  
13  
14  
15  
16  
17  
18  
19  
20  
21  
22  
23  
24  
25  
26  
27  
28  
29  
30  
31  
32  
33  
34  
35  
36  
37  
38  
39  
40  
41  
42  
43  
44  
45  
46

**Supplementary Figure 1:** Diagram flow of the study with no recovery data at T6.

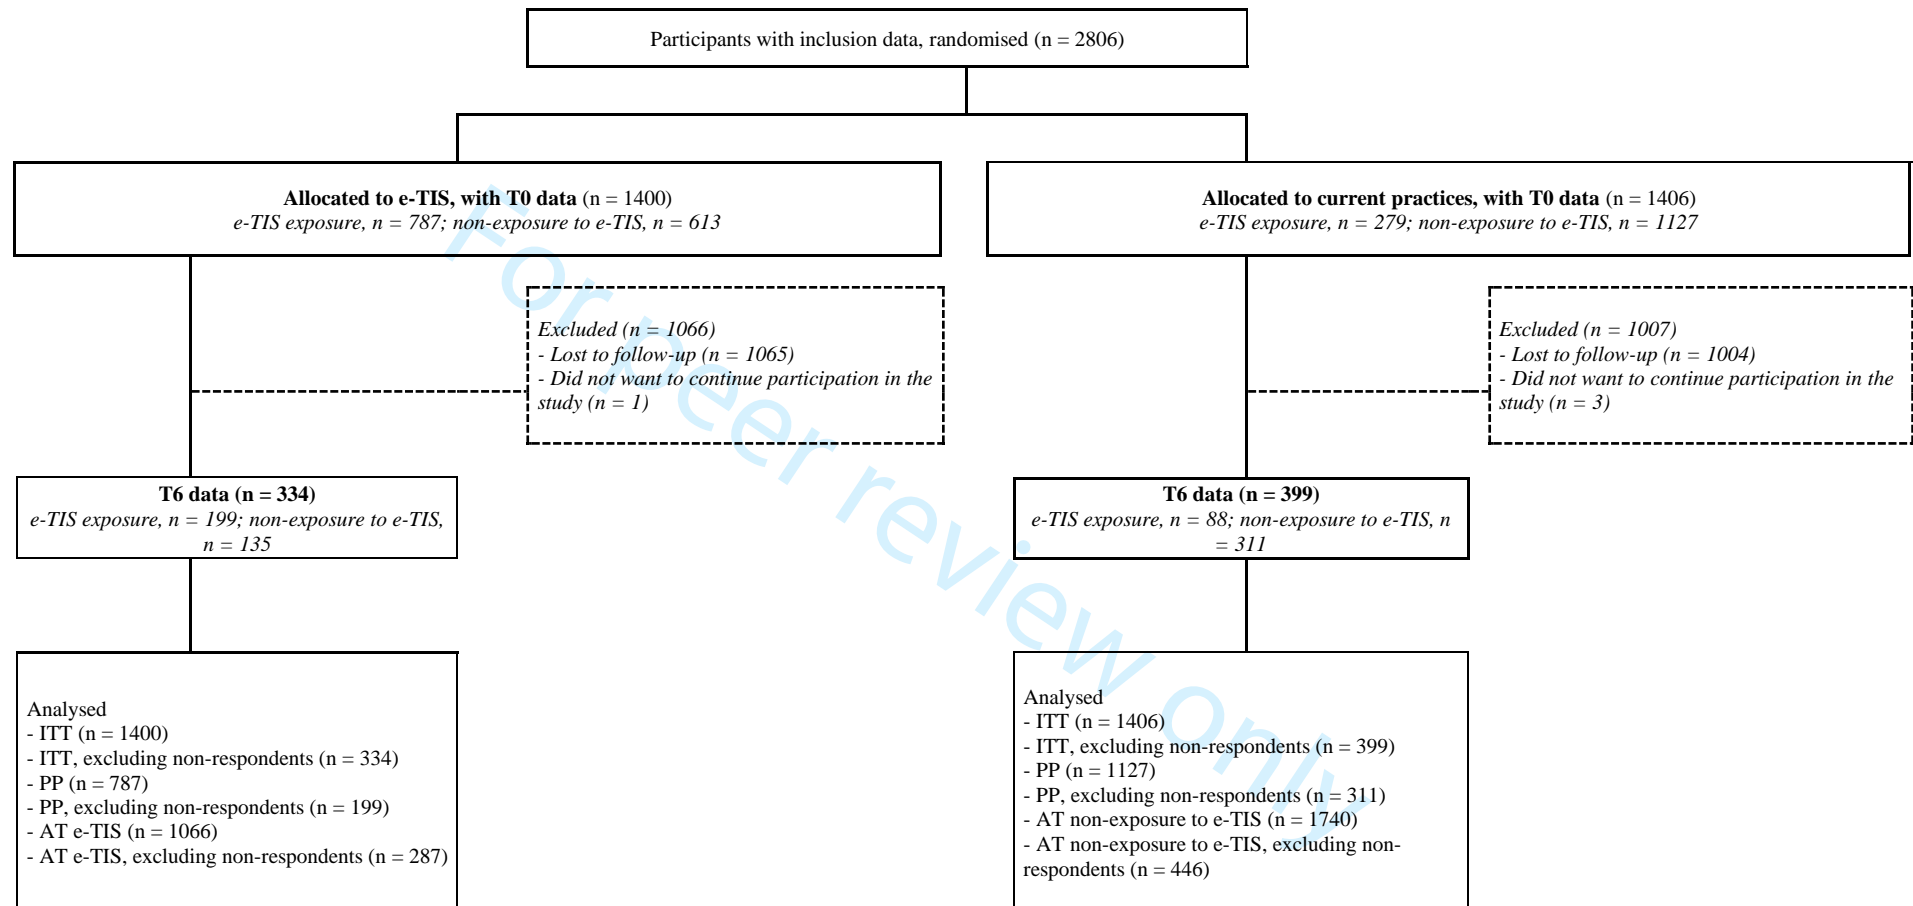

e-TIS, e-intervention Tabac Info Service; ITT, Intention to Treat; PP, Per Protocol; AT, As Treated

**Supplementary Figure 2:** Subgroup analysis in ITT population, considering non-respondents as smokers (n=2806)

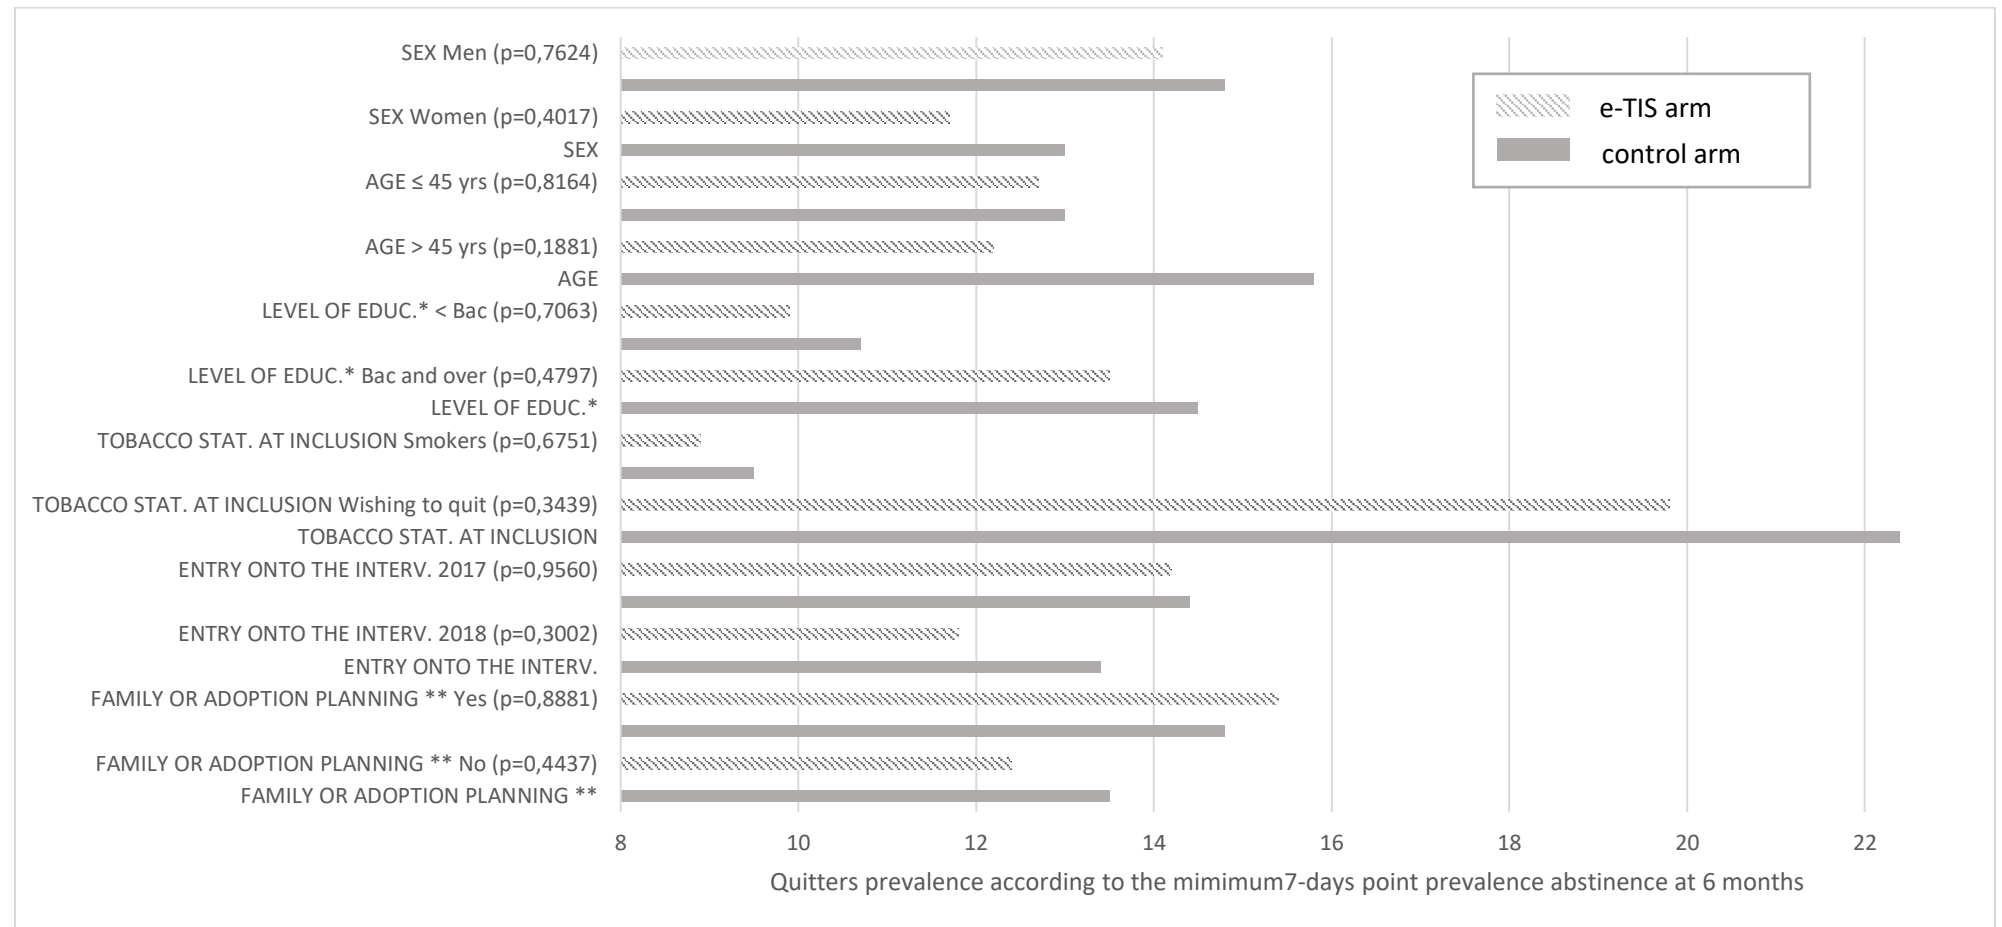

\* n=2786 due to missing data  
 \*\*n=2771 due to missing data  
 P-values are derived from Chi-2 tests

**Supplementary Table 1:** Baseline characteristics of the randomised patients and levels of exposure to the application during the study, according to intervention arm (n = 2806).

|                                                                                | Total<br>n = 2806 |      | e-TIS<br>n = 1400 (49.9%) |      | Control<br>n = 1406 (50.1%) |      | p-value* |
|--------------------------------------------------------------------------------|-------------------|------|---------------------------|------|-----------------------------|------|----------|
|                                                                                | n                 | %    | n                         | %    | n                           | %    |          |
| <b>BASELINE CHARACTERISTICS</b>                                                |                   |      |                           |      |                             |      |          |
| <b>Sex</b>                                                                     |                   |      |                           |      |                             |      | 0.7308   |
| Male                                                                           | 1033              | 36.8 | 511                       | 36.5 | 522                         | 37.1 |          |
| Female                                                                         | 1773              | 63.2 | 889                       | 63.5 | 884                         | 62.9 |          |
| <b>Age</b>                                                                     |                   |      |                           |      |                             |      | 0.9418   |
| ≤ 45 years                                                                     | 2163              | 77.1 | 1080                      | 77.1 | 1083                        | 77.0 |          |
| < 45 years                                                                     | 643               | 22.9 | 320                       | 22.9 | 323                         | 23.0 |          |
| <b>Smoking status at inclusion</b>                                             |                   |      |                           |      |                             |      | 0.5475   |
| Smokers                                                                        | 1881              | 67.0 | 931                       | 66.5 | 950                         | 67.6 |          |
| Wishing to quit                                                                | 925               | 33.0 | 469                       | 33.5 | 456                         | 32.4 |          |
| <b>Living situation</b>                                                        |                   |      |                           |      |                             |      | 0.9570   |
| Single                                                                         | 828               | 29.6 | 414                       | 29.7 | 414                         | 29.6 |          |
| With a partner                                                                 | 1661              | 59.4 | 829                       | 59.4 | 832                         | 59.4 |          |
| With parents                                                                   | 150               | 5.4  | 71                        | 5.1  | 79                          | 5.6  |          |
| With roommates                                                                 | 72                | 2.6  | 38                        | 2.7  | 34                          | 2.4  |          |
| Other                                                                          | 85                | 3.0  | 43                        | 3.1  | 42                          | 3.0  |          |
| Missing data                                                                   | 10                |      | 5                         |      | 5                           |      |          |
| <b>Living with minors</b>                                                      |                   |      |                           |      |                             |      | 0.5344   |
| Yes                                                                            | 1343              | 48.3 | 678                       | 48.8 | 665                         | 47.7 |          |
| No                                                                             | 1440              | 51.7 | 710                       | 51.2 | 730                         | 52.3 |          |
| Missing data                                                                   | 23                |      | 12                        |      | 11                          |      |          |
| <b>Current pregnancy in the couple</b>                                         |                   |      |                           |      |                             |      | 0.6772   |
| Yes                                                                            | 128               | 4.6  | 66                        | 4.8  | 62                          | 4.5  |          |
| No                                                                             | 2645              | 95.4 | 1314                      | 95.2 | 1331                        | 95.5 |          |
| Missing data                                                                   | 33                |      | 20                        |      | 13                          |      |          |
| <b>Pregnancy/adoption within 1 year</b>                                        |                   |      |                           |      |                             |      | 0.1564   |
| Yes                                                                            | 338               | 12.2 | 156                       | 11.3 | 182                         | 13.1 |          |
| No                                                                             | 2433              | 87.8 | 1223                      | 88.7 | 1210                        | 86.9 |          |
| Missing data                                                                   | 35                |      | 21                        |      | 14                          |      |          |
| <b>Level of education</b>                                                      |                   |      |                           |      |                             |      | 0.5847   |
| Less than baccalaureate degree                                                 | 700               | 25.1 | 355                       | 25.6 | 345                         | 24.7 |          |
| Baccalaureate degree or higher                                                 | 2086              | 74.9 | 1033                      | 74.4 | 1053                        | 75.3 |          |
| Missing data                                                                   | 20                |      | 12                        |      | 8                           |      |          |
| <b>Treatment for cardiovascular and/or respiratory diseases</b>                |                   |      |                           |      |                             |      | 0.0556   |
| Yes                                                                            | 426               | 15.5 | 231                       | 16.9 | 195                         | 14.2 |          |
| No                                                                             | 2316              | 84.5 | 1139                      | 83.1 | 1177                        | 85.8 |          |
| Missing data                                                                   | 64                |      | 30                        |      | 34                          |      |          |
| <b>EXPOSURE TO THE APPLICATION DURING THE STUDY</b>                            |                   |      |                           |      |                             |      |          |
| <b>e-TIS downloaded</b>                                                        |                   |      |                           |      |                             |      | < 0.0001 |
| Yes                                                                            | 1139              | 40.6 | 843                       | 60.2 | 296                         | 21.0 |          |
| No                                                                             | 1667              | 59.6 | 557                       | 39.8 | 1110                        | 79.0 |          |
| <b>e-TIS exposure (i.e., completed at least one activity or questionnaire)</b> |                   |      |                           |      |                             |      | < 0.0001 |
| Yes                                                                            | 1066              | 38.0 | 787                       | 56.2 | 279                         | 19.8 |          |
| No                                                                             | 1740              | 62.0 | 613                       | 43.8 | 1127                        | 80.2 |          |

\* Chi-squared test for qualitative variables  
e-TIS, e-intervention Tabac Info Service

**Supplementary Table 2:** Secondary outcomes in the ITT population, which only considered respondents.

|                                                                             | Total |        |      | e-TIS |        |       | Control |        |      | <i>p</i> -value* |
|-----------------------------------------------------------------------------|-------|--------|------|-------|--------|-------|---------|--------|------|------------------|
|                                                                             | n     | %/mean | SD   | n     | %/mean | SD    | n       | %/mean | SD*  |                  |
| <b>Continuous abstinence at 6 months (n = 733)</b>                          |       |        |      |       |        |       |         |        |      | 0.4536           |
| No                                                                          | 441   | 60.2   |      | 196   | 58.7   |       | 245     | 61.4   |      |                  |
| Yes                                                                         | 292   | 39.8   |      | 138   | 41.3   |       | 154     | 38.6   |      |                  |
| <b>Continuous abstinence at 12 months (n = 422)</b>                         |       |        |      |       |        |       |         |        |      | 0.1816           |
| No                                                                          | 198   | 46.9   |      | 87    | 43.5   |       | 111     | 50.0   |      |                  |
| Yes                                                                         | 224   | 53.1   |      | 113   | 56.5   |       | 111     | 50.0   |      |                  |
| <b>Minimum 24-hour point abstinence at 3 months (n = 644)</b>               |       |        |      |       |        |       |         |        |      | 0.1508           |
| No                                                                          | 420   | 65.2   |      | 174   | 62.1   |       | 246     | 67.6   |      |                  |
| Yes                                                                         | 224   | 34.8   |      | 106   | 37.9   |       | 118     | 32.4   |      |                  |
| <b>Minimum 30-day point abstinence at 12 months (n = 422)</b>               |       |        |      |       |        |       |         |        |      | 0.2914           |
| No                                                                          | 258   | 61.1   |      | 117   | 58.5   |       | 141     | 63.5   |      |                  |
| Yes                                                                         | 164   | 38.9   |      | 83    | 41.5   |       | 81      | 36.5   |      |                  |
| <b>Number of quit attempts at T3 (n = 644)</b><br>( <i>n miss</i> = 409)    | 235   | 1.7    | 5.7  | 112   | 1.7    | 6.1   | 123     | 1.6    | 5.4  | 0.9441           |
| <b>Duration of quit attempts at T3 (n = 644)</b><br>( <i>n miss</i> = 442)  | 202   | 58.5   | 45.8 | 95    | 54.8   | 44.8  | 107     | 61.8   | 46.6 | 0.2785           |
| <b>Number of quit attempts at T6 (n = 733)</b><br>( <i>n miss</i> = 447)    | 286   | 1.1    | 1.0  | 134   | 1.0    | 0.8   | 152     | 1.1    | 1.1  | 0.5654           |
| <b>Duration of quit attempts at T6 (n = 733)</b><br>( <i>n miss</i> = 516)  | 217   | 72.5   | 90.5 | 103   | 82.1   | 124.6 | 114     | 64.0   | 38.3 | 0.1414           |
| <b>Number of quit attempts at T12 (n = 422)</b><br>( <i>n miss</i> = 205)   | 217   | 1.7    | 6.6  | 112   | 1.0    | 1.2   | 105     | 2.4    | 9.4  | 0.1327           |
| <b>Duration of quit attempts at T12 (n = 422)</b><br>( <i>n miss</i> = 262) | 160   | 82.9   | 79.8 | 79    | 87.1   | 87.4  | 81      | 78.9   | 71.8 | 0.5205           |

\* Chi-squared test and Wilcoxon test

e-TIS, e-intervention Tabac Info Service; SD, standard deviation

**Supplementary Table 3:** Between-group differences in the primary outcome (minimum 7-day PPA at 6 months) in the ITT, PP and AT populations without considering recovery data at T6.

| ITT POPULATION                                              |                   |      |                              |      |                                             |      |        |
|-------------------------------------------------------------|-------------------|------|------------------------------|------|---------------------------------------------|------|--------|
|                                                             | Total<br>n = 2806 |      | e-TIS<br>n = 1400<br>(49.9%) |      | Control<br>n = 1406<br>(50.1%)              |      | p*     |
|                                                             | n                 | %    | n                            | %    | n                                           | %    |        |
| <b>Minimum 7-day PPA at 6 months (n = 733)<sup>1</sup></b>  |                   |      |                              |      |                                             |      | 0.9195 |
| Smokers                                                     | 477               | 65.1 | 218                          | 65.3 | 259                                         | 64.9 |        |
| Quitters                                                    | 256               | 34.9 | 116                          | 34.7 | 140                                         | 35.1 |        |
| <b>Minimum 7-day PPA at 6 months (n = 2806)<sup>2</sup></b> |                   |      |                              |      |                                             |      | 0.1241 |
| Smokers                                                     | 2550              | 90.9 | 1284                         | 91.7 | 1266                                        | 90.0 |        |
| Quitters                                                    | 256               | 9.1  | 116                          | 8.3  | 140                                         | 10.0 |        |
| PP POPULATION                                               |                   |      |                              |      |                                             |      |        |
|                                                             | Total<br>n = 1914 |      | e-TIS<br>n = 787<br>(41.1%)  |      | Control<br>n = 1127<br>(58.9%)              |      | p*     |
|                                                             | n                 | %    | n                            | %    | n                                           | %    |        |
| <b>Minimum 7-day PPA at 6 months (n = 510)<sup>1</sup></b>  |                   |      |                              |      |                                             |      | 0.6570 |
| Smokers                                                     | 334               | 65.5 | 128                          | 64.3 | 206                                         | 66.2 |        |
| Quitters                                                    | 176               | 34.5 | 71                           | 35.7 | 105                                         | 33.8 |        |
| <b>Minimum 7-day PPA at 6 months (n = 1914)<sup>2</sup></b> |                   |      |                              |      |                                             |      | 0.8260 |
| Smokers                                                     | 1738              | 90.8 | 716                          | 91.0 | 1022                                        | 90.7 |        |
| Quitters                                                    | 176               | 9.2  | 71                           | 9.0  | 105                                         | 9.3  |        |
| AT POPULATION                                               |                   |      |                              |      |                                             |      |        |
|                                                             | Total<br>n = 2806 |      | e-TIS<br>n = 1066<br>(38.0%) |      | Non-exposed to e-TIS<br>n = 1740<br>(62.0%) |      | p*     |
|                                                             | n                 | %    | n                            | %    | n                                           | %    |        |
| <b>Minimum 7-day PPA at 6 months (n = 733)<sup>1</sup></b>  |                   |      |                              |      |                                             |      | 0.3601 |
| Smokers                                                     | 477               | 65.1 | 181                          | 63.1 | 296                                         | 66.4 |        |
| Quitters                                                    | 256               | 34.9 | 106                          | 36.9 | 150                                         | 33.6 |        |
| <b>Minimum 7-day PPA at 6 months (n = 2806)<sup>2</sup></b> |                   |      |                              |      |                                             |      | 0.2375 |
| Smokers                                                     | 2550              | 90.9 | 960                          | 90.1 | 1590                                        | 91.4 |        |
| Quitters                                                    | 256               | 9.1  | 106                          | 9.9  | 150                                         | 8.6  |        |

<sup>1</sup> Only respondents considered<sup>2</sup> Non-respondents considered as smokers

\* Chi-squared test

e-TIS, e-intervention Tabac Info Service; PPA, point prevalence abstinence



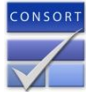

## CONSORT 2010 checklist of information to include when reporting a randomised trial\*

| Section/Topic                         | Item No | Checklist item                                                                                                                                                                              | Reported on page No |
|---------------------------------------|---------|---------------------------------------------------------------------------------------------------------------------------------------------------------------------------------------------|---------------------|
| <b>Title and abstract</b>             |         |                                                                                                                                                                                             |                     |
|                                       | 1a      | Identification as a randomised trial in the title                                                                                                                                           | 1                   |
|                                       | 1b      | Structured summary of trial design, methods, results, and conclusions (for specific guidance see CONSORT for abstracts)                                                                     | 1                   |
| <b>Introduction</b>                   |         |                                                                                                                                                                                             |                     |
| Background and objectives             | 2a      | Scientific background and explanation of rationale                                                                                                                                          | 2                   |
|                                       | 2b      | Specific objectives or hypotheses                                                                                                                                                           | 4                   |
| <b>Methods</b>                        |         |                                                                                                                                                                                             |                     |
| Trial design                          | 3a      | Description of trial design (such as parallel, factorial) including allocation ratio                                                                                                        | 5                   |
|                                       | 3b      | Important changes to methods after trial commencement (such as eligibility criteria), with reasons                                                                                          | NA                  |
| Participants                          | 4a      | Eligibility criteria for participants                                                                                                                                                       | 6                   |
|                                       | 4b      | Settings and locations where the data were collected                                                                                                                                        | 5                   |
| Interventions                         | 5       | The interventions for each group with sufficient details to allow replication, including how and when they were actually administered                                                       | 6                   |
| Outcomes                              | 6a      | Completely defined pre-specified primary and secondary outcome measures, including how and when they were assessed                                                                          | 8                   |
|                                       | 6b      | Any changes to trial outcomes after the trial commenced, with reasons                                                                                                                       | 8                   |
| Sample size                           | 7a      | How sample size was determined                                                                                                                                                              | 9                   |
|                                       | 7b      | When applicable, explanation of any interim analyses and stopping guidelines                                                                                                                | NA                  |
| Randomisation:<br>Sequence generation | 8a      | Method used to generate the random allocation sequence                                                                                                                                      | 5                   |
|                                       | 8b      | Type of randomisation; details of any restriction (such as blocking and block size)                                                                                                         | 5                   |
| Allocation concealment mechanism      | 9       | Mechanism used to implement the random allocation sequence (such as sequentially numbered containers), describing any steps taken to conceal the sequence until interventions were assigned | 5                   |
| Implementation                        | 10      | Who generated the random allocation sequence, who enrolled participants, and who assigned participants to interventions                                                                     | 5                   |
| Blinding                              | 11a     | If done, who was blinded after assignment to interventions (for example, participants, care providers, those assessing outcomes) and how                                                    | NA                  |
|                                       | 11b     | If relevant, description of the similarity of interventions                                                                                                                                 | NA                  |
| Statistical methods                   | 12a     | Statistical methods used to compare groups for primary and secondary outcomes                                                                                                               | 9                   |
|                                       | 12b     | Methods for additional analyses, such as subgroup analyses and adjusted analyses                                                                                                            | 10                  |

|    |                          |     |                                                                                                                  |       |
|----|--------------------------|-----|------------------------------------------------------------------------------------------------------------------|-------|
| 1  | <b>Results</b>           |     |                                                                                                                  |       |
| 2  | Participant flow (a      | 13a | For each group, the numbers of participants who were randomly assigned, received intended treatment, and         | Fig 1 |
| 3  | diagram is strongly      |     | were analysed for the primary outcome                                                                            |       |
| 4  | recommended)             | 13b | For each group, losses and exclusions after randomisation, together with reasons                                 | Fig 1 |
| 5  | Recruitment              | 14a | Dates defining the periods of recruitment and follow-up                                                          | 5     |
| 6  |                          | 14b | Why the trial ended or was stopped                                                                               | NA    |
| 7  | Baseline data            | 15  | A table showing baseline demographic and clinical characteristics for each group                                 | Suppl |
| 8  | Numbers analysed         | 16  | For each group, number of participants (denominator) included in each analysis and whether the analysis was      | 27    |
| 9  |                          |     | by original assigned groups                                                                                      |       |
| 10 | Outcomes and             | 17a | For each primary and secondary outcome, results for each group, and the estimated effect size and its            | 12    |
| 11 | estimation               |     | precision (such as 95% confidence interval)                                                                      |       |
| 12 |                          | 17b | For binary outcomes, presentation of both absolute and relative effect sizes is recommended                      | 27    |
| 13 | Ancillary analyses       | 18  | Results of any other analyses performed, including subgroup analyses and adjusted analyses, distinguishing       | 14    |
| 14 |                          |     | pre-specified from exploratory                                                                                   |       |
| 15 | Harms                    | 19  | All important harms or unintended effects in each group (for specific guidance see CONSORT for harms)            | NA    |
| 16 |                          |     |                                                                                                                  |       |
| 17 | <b>Discussion</b>        |     |                                                                                                                  |       |
| 18 | Limitations              | 20  | Trial limitations, addressing sources of potential bias, imprecision, and, if relevant, multiplicity of analyses | 19    |
| 19 | Generalisability         | 21  | Generalisability (external validity, applicability) of the trial findings                                        | 21    |
| 20 | Interpretation           | 22  | Interpretation consistent with results, balancing benefits and harms, and considering other relevant evidence    | 15    |
| 21 |                          |     |                                                                                                                  | 2     |
| 22 | <b>Other information</b> |     |                                                                                                                  |       |
| 23 | Registration             | 23  | Registration number and name of trial registry                                                                   |       |
| 24 | Protocol                 | 24  | Where the full trial protocol can be accessed, if available                                                      | 5     |
| 25 | Funding                  | 25  | Sources of funding and other support (such as supply of drugs), role of funders                                  | 3     |
| 26 |                          |     |                                                                                                                  |       |

\*We strongly recommend reading this statement in conjunction with the CONSORT 2010 Explanation and Elaboration for important clarifications on all the items. If relevant, we also recommend reading CONSORT extensions for cluster randomised trials, non-inferiority and equivalence trials, non-pharmacological treatments, herbal interventions, and pragmatic trials. Additional extensions are forthcoming: for those and for up to date references relevant to this checklist, see [www.consort-statement.org](http://www.consort-statement.org).

# BMJ Open

## Effectiveness of the e-Tabac Info Service application for smoking cessation: A pragmatic randomised controlled trial

|                                 |                                                                                                                                                                                                                                                                                                                                                                                                                                                                                                                                                                                         |
|---------------------------------|-----------------------------------------------------------------------------------------------------------------------------------------------------------------------------------------------------------------------------------------------------------------------------------------------------------------------------------------------------------------------------------------------------------------------------------------------------------------------------------------------------------------------------------------------------------------------------------------|
| Journal:                        | <i>BMJ Open</i>                                                                                                                                                                                                                                                                                                                                                                                                                                                                                                                                                                         |
| Manuscript ID                   | bmjopen-2020-039515.R1                                                                                                                                                                                                                                                                                                                                                                                                                                                                                                                                                                  |
| Article Type:                   | Original research                                                                                                                                                                                                                                                                                                                                                                                                                                                                                                                                                                       |
| Date Submitted by the Author:   | 10-Aug-2020                                                                                                                                                                                                                                                                                                                                                                                                                                                                                                                                                                             |
| Complete List of Authors:       | Affret, Aurelie; Université Bordeaux, Population Health Research Center, UMR 1219, CIC-EC 1401<br>Luc, Amandine; CHRU de Nancy<br>Baumann, Cédric; CHRU de Nancy<br>Bergman, Pierre; Caisse nationale de l'assurance maladie<br>Lefaou, Anne Laurence; AP-HP<br>Pasquereau, Anne; Santé publique France<br>Arwidson, Pierre; Sante publique France, Prevention and Health Promotion<br>Alla, François; Bordeaux II University, Population Health Research Center, UMR 1219, CIC-EC 1401<br>Cambon, Linda; Université Bordeaux, Population Health Research Center, UMR 1219, CIC-EC 1401 |
| <b>Primary Subject Heading</b>: | Public health                                                                                                                                                                                                                                                                                                                                                                                                                                                                                                                                                                           |
| Secondary Subject Heading:      | Addiction                                                                                                                                                                                                                                                                                                                                                                                                                                                                                                                                                                               |
| Keywords:                       | PUBLIC HEALTH, PREVENTIVE MEDICINE, Clinical trials < THERAPEUTICS                                                                                                                                                                                                                                                                                                                                                                                                                                                                                                                      |
|                                 |                                                                                                                                                                                                                                                                                                                                                                                                                                                                                                                                                                                         |

SCHOLARONE™  
Manuscripts



I, the Submitting Author has the right to grant and does grant on behalf of all authors of the Work (as defined in the below author licence), an exclusive licence and/or a non-exclusive licence for contributions from authors who are: i) UK Crown employees; ii) where BMJ has agreed a CC-BY licence shall apply, and/or iii) in accordance with the terms applicable for US Federal Government officers or employees acting as part of their official duties; on a worldwide, perpetual, irrevocable, royalty-free basis to BMJ Publishing Group Ltd ("BMJ") its licensees and where the relevant Journal is co-owned by BMJ to the co-owners of the Journal, to publish the Work in this journal and any other BMJ products and to exploit all rights, as set out in our [licence](#).

The Submitting Author accepts and understands that any supply made under these terms is made by BMJ to the Submitting Author unless you are acting as an employee on behalf of your employer or a postgraduate student of an affiliated institution which is paying any applicable article publishing charge ("APC") for Open Access articles. Where the Submitting Author wishes to make the Work available on an Open Access basis (and intends to pay the relevant APC), the terms of reuse of such Open Access shall be governed by a Creative Commons licence – details of these licences and which [Creative Commons](#) licence will apply to this Work are set out in our licence referred to above.

Other than as permitted in any relevant BMJ Author's Self Archiving Policies, I confirm this Work has not been accepted for publication elsewhere, is not being considered for publication elsewhere and does not duplicate material already published. I confirm all authors consent to publication of this Work and authorise the granting of this licence.

1  
2  
3  
4 Effectiveness of the e-Tabac Info Service application for smoking cessation: A  
5  
6 pragmatic randomised controlled trial  
7  
8  
9  
10

11 Aurélie Affret<sup>1,2,3</sup>, Amandine Luc<sup>4</sup>, Cédric Baumann<sup>4</sup>, Pierre Bergman<sup>5</sup>, Anne-Laurence Le Faou<sup>6,7,8</sup>,  
12 Anne Pasquereau<sup>9</sup>, Pierre Arwidson<sup>9</sup>, François Alla<sup>2,3</sup>, Linda Cambon<sup>1,2,3</sup>.  
13  
14  
15

16  
17 <sup>1</sup> Chaire de prévention ISPED/SPF, Université de Bordeaux, Bordeaux, France

18 <sup>2</sup> Univ. Bordeaux, INSERM, Bordeaux Population Health Research Center, UMR 1219, Bordeaux,  
19 France

20 <sup>3</sup> CHU Bordeaux, Inserm, CIC1401-EC, Bordeaux, France

21 <sup>4</sup> CHRU Nancy, Department of MPI Unit of Methodology, data management and statistic (UMDS),  
22 Vandoeuvre-lès-Nancy, France

23 <sup>5</sup> Caisse nationale de l'Assurance Maladie, Paris, France

24 <sup>6</sup> Societe Francophone de Tabacologie, Paris, France

25 <sup>7</sup> Hôpital Européen Georges Pompidou, APHP. Outpatient Addictology Center, Paris, France

26 <sup>8</sup>. Université de Paris, UMRS 1123, Paris, France

27 <sup>9</sup>. Santé publique France, the french public health agency, Saint Maurice, France  
28  
29  
30  
31  
32  
33  
34  
35

36 Corresponding author:

37 François Alla

38 E-mail: francois.alla@u-bordeaux.fr

39  
40  
41  
42 Tél : (+33) (0)5 57 57 13 93  
43  
44  
45  
46  
47  
48  
49  
50  
51  
52  
53  
54  
55  
56  
57  
58  
59  
60

**Word count: 3809**

## Abstract

**Objective:** To compare the effectiveness of the mobile e-Tabac Info Service (e-TIS) application (app) for helping adult smokers quit smoking with current practices.

**Design:** Pragmatic randomised controlled trial with a 1-year follow-up (2017-2018).

Setting: France, population-wide level.

**Participants:** 2806 adult smokers who wished to quit smoking were recruited via the website of the French National Mandatory Health Insurance fund. Of them, 1400 were randomised to the e-TIS app arm and 1406 were randomised to the current practices arm (control).

**Intervention:** The app involved personalised interactive contacts that included questionnaires, advice, activities, and text messages. All contacts were individually tailored and based on each smoker's progress.

In the control group, recommended practices for quitting smoking were described on a non-interactive website.

**Primary and secondary outcomes measures:** The primary outcome was 7-day point prevalence abstinence (PPA) at 6 months. The secondary outcomes included continuous abstinence rates at 6 and 12 months, minimum 24-hour point abstinence at 3 months, minimum 30-day point abstinence at 12 months, and number and duration of quit attempts.

**Results:** There was no difference between the e-TIS and control arms for the primary outcome (12.6% vs. 13.7% for 7-day PPA at 6 months,  $p = 0.3949$ , intention-to-treat [ITT] analysis). However, e-TIS participants with high levels of exposure to the app, which was defined by the completion of at least eight activities or questionnaires, showed higher rates of smoking cessation than the control participants (17.6% vs. 12.9% for 7-day PPA at 6 months,  $p = 0.0169$ , per-protocol [PP] analysis).

1  
2  
3 **Conclusion:** Use of the e-TIS app was not associated with a higher rate of smoking cessation.  
4  
5 However, high level of exposure to the e-TIS app may have been more effective than current  
6  
7 practices.  
8  
9

10 **Trial registration number:** NCT02841683  
11  
12

13  
14 **Keywords:** Smoking cessation, e-health, internet-based intervention, prevention, mobile  
15  
16 phone, effectiveness  
17  
18

### 19 20 21 **Strengths and limitations of the present study** 22

- 23
- 24
- 25 • This was a large, national, randomised controlled trial
- 26
- 27 • This was a pragmatic trial that was conducted under ‘real-life’ conditions
- 28
- 29 • According to guidelines, the primary outcome was point prevalence abstinence (PPA)
- 30 at 6-month.
- 31
- 32 • The main limitation of the study is the high attrition rate.
- 33

34 Findings may have been influenced by contamination between arms due to the unrestricted  
35 availability of the e-TIS from app stores during the trial.  
36  
37

### 38 39 **Funding** 40

41 This work was supported by the Caisse nationale d’assurance maladie (Award/Grant number  
42 is not applicable)  
43

### 44 **Data sharing statement** 45

46 No additional data available  
47

### 48 **Competing interests** 49

50 ALLF reports a grant and conference honoraria from Pfizer, as well as a conference  
51 honorarium from J&J that was outside the scope of the submitted work. All other authors  
52 have no competing interests to report.  
53

54 The English in this document has been checked by at least two professional editors, both  
55 native speakers of English.  
56

### 57 **Authors’ contributions** 58 59 60

1  
2  
3 LC and FA managed the scientific coordination of the study. CB coordinated the data  
4 management and statistical analysis. AL performed the statistical analyses. . CB, PB, ALLF,  
5 AP, PA contributed to the design and to the interpretation of the results. AA, LC, FA wrote  
6 the draft. All authors reviewed and contributed to the article and validated its final version.  
7  
8  
9  
10  
11  
12  
13  
14  
15  
16  
17  
18  
19  
20  
21  
22  
23  
24  
25  
26  
27  
28  
29  
30  
31  
32  
33  
34  
35  
36  
37  
38  
39  
40  
41  
42  
43  
44  
45  
46  
47  
48  
49  
50  
51  
52  
53  
54  
55  
56  
57  
58  
59  
60

For peer review only



## Introduction

Smoking remains a leading risk factor for early death and disability (1). Thus, there is a need to strengthen support for smoking cessation. In this context, mobile phone applications (apps) are increasingly used and have several advantages in terms of their inexpensiveness, scalability to large populations, interactivity, ability to be used anywhere at any time, to be tailored to individual users, to distract smokers from cravings, and to link users with social support (2). Although several apps for smoking cessation are available only a few are theory- or evidence-based (3,4). Nonetheless, these health apps appear to be used more effectively and for longer periods of time when they offer support that extends beyond motivation maintenance and contributions to self-knowledge (5).

In France, a theory-based app for smoking cessation, the e-intervention Tabac Info Service (e-TIS), has been developed by Santé publique France and the Caisse nationale d'assurance maladie (6). This app was designed to provide support to smokers who wish to quit, including those who are not currently involved in a quit attempt, and was based on the effectiveness criteria of online programmes (7) and psychosocial and behavioural change theories (8–12). The e-TIS app provides tailored activities, self-report exercises, tips, social and/or psychological support, reassurance, and motivational text messages that are adapted to the individual characteristics of the user (13). The present study evaluated the effectiveness of the theory-based smoking cessation e-TIS app in a pragmatic randomised controlled trial conducted in France on a population-wide level.

## Methods

This manuscript was written in accordance with the CONSORT Statement and the EHEALTH checklist (14).

## Study design

The protocol was previously registered (NCT02841683) and published (13). Participants were randomly assigned (1:1) to either the intervention arm (invitation to use the e-TIS app) or the control arm (current practices for smoking cessation described on a non-interactive website from the French National Mandatory Health Insurance [ameli.fr]). The current practices were based on the guidelines of the Haute Autorité de Santé (15). All participants were recruited between February 2017 and April 2018, then followed up over the subsequent 1-year period. All participants consented to inclusion in the study and an automated randomisation procedure was carried out following the receipt of all inclusion data. A minimisation software package was employed to reduce the risk of unmatched groups and to stratify the participants based on age and sex, using the following parameters: study arm (e-TIS and control, allocated 50/50), sex (male/female), and age ( $\leq 45$  years or  $> 45$  years).

## Study population and sample

When visiting their personal account on the French Mandatory National Health Insurance website, users were invited to participate in the present study via a banner. Users who clicked on the banner were presented with an information sheet, which included a section where they could provide informed consent. The consent form contained the inclusion questionnaire, with the following criteria: 1) adult smoker; 2) completion of the online consent form; 3) agreement to participate in the study; 4) possession of a mobile phone using an iOS or Android system; 5) willingness to use the app; and 6) attempt or consideration of an attempt to quit smoking. If the user provided consent to be enrolled in the study, they were sent an email with a confirmation link. When the participants clicked the confirmation link, they were randomised and invited to fill in the entry questionnaire (T0) for the study.

### **Intervention arm: e-TIS app**

Participants assigned to the intervention arm were invited to download the e-TIS app. In accordance with the relapse prevention model (16,17), the e-TIS app is tailored to each individual smoker based on feedback. Furthermore, the support process in the e-TIS is based on the efficacy criteria of online programmes, which include the frequency and intensity of contacts, short messages, interactivity, appeal, personalisation, credibility of content, and sharing functions (7), as well as various theoretical models that are used for withdrawal treatments (8–12,18).

The e-TIS app involves personalised interactive (push) contacts that include questionnaires, activities, and text messages which are available via mobile phone, the website platform, and tablets. In total, the intervention consists of 16 different activities, eight position questionnaires (to adapt the app content to the evolution of one's willingness to quit or attempt to quit), and a set of roughly 170 email or push-app text messages/notifications with distinct purposes. All contacts are tailored to the answers on the eight position questionnaires and an individual's progress through the four modules of the app. Each participant began the process within a module that was adapted to his/her individual stage regarding tobacco status. The content has been described in detail elsewhere (13). The present study evaluated e-TIS version 2.0.

### **Control arm: Current practices**

Participants assigned to the control arm were invited to visit a pre-existing -website page that listed smoking cessation resources that are readily available in France and recommended by the Haute Autorité de Santé (15).

### **Outcomes and other data**

1  
2  
3 The primary outcome in the present study was point prevalence abstinence (PPA) at the 6-  
4 month follow-up assessment. The PPA for smoking is a minimum of 7 days (19). In general,  
5 the PPA is considered to be the most appropriate measure for evaluating abstinence in  
6 intervention evaluation studies (20).  
7  
8  
9  
10

11 Because a large number of participants were lost to follow-up during the study, and due to the  
12 need to limit the amount of missing data, the original study protocol was modified as follows  
13 before the blinding was lifted: 1) for participants with information regarding smoking status at  
14 12 months but not at 6 months, the 12-month smoking status was used to replace the missing  
15 data regarding smoking status at 6 months; 2) for participants with information regarding  
16 smoking status at 3 months but not at 6 or 12 months, the 3-month smoking status was used to  
17 replace the missing data regarding smoking status at 6 months. Additionally, at the 6-month  
18 follow-up assessment, participants with missing data were phoned and reminded of the study.  
19 This recalculated criterion was used as the primary outcome. Sensitivity analyses were  
20 performed with the original criterion (i.e. without imputations for missing data).  
21  
22  
23  
24  
25  
26  
27  
28  
29  
30  
31  
32  
33  
34

35 Based on previous data and recommendations (2,7,20,21), the secondary outcomes in the  
36 present study included continuous abstinence at 6 months, continuous abstinence at 12  
37 months, minimum 24-hour point abstinence at 3 months, minimum 30-day point abstinence at  
38 12 months, and number and duration of quit attempts. To further characterise tobacco  
39 consumption, the present study also collected data associated with the dependency and  
40 determinants of abstinence, described elsewhere (13).  
41  
42  
43  
44  
45  
46  
47  
48  
49  
50

### 51 **Data collection**

52 Data were collected via internet-based self-report questionnaires at inclusion (technical  
53 variables), study initiation (initial self-reporting questionnaire), and at 3, 6, and 12 months  
54 (three follow-up self-report questionnaires). Application usage data were extracted from the  
55  
56  
57  
58  
59  
60

1  
2  
3 application database and a match with the study data measured whether or not the persons  
4 included in both arms used the application.  
5  
6  
7  
8  
9

## 10 **Statistical analysis**

### 11 *Sample size calculation*

12  
13  
14 The required sample size was calculated based on the hypothesis of a 10% abstinence rate at  
15 6-month follow-up in the control group (22). Given this rate, sample sizes of 1500  
16 participants per group were necessary to show a minimum odds ratio of 1.5 with a power of  
17 90% ( $\alpha = 0.05$ , bilateral test); thus, a total sample size of 3000 individuals was necessary (23).  
18  
19  
20  
21  
22  
23  
24  
25

### 26 *Statistical methods*

27  
28 Statistical analyses were performed for the intention-to-treat (ITT), per-protocol (PP), and as-  
29 treated (AT) populations. The ITT analysis included all participants in the arms to which they  
30 were randomised, regardless of adherence to the prescribed intervention. For the PP and AT  
31 analyses, exposure to the application was defined as the completion of at least one activity or  
32 questionnaire through the app. For the PP analysis, participants in the intervention arm were  
33 defined as those randomised to that arm who completed at least one activity or questionnaire.  
34 Participants in the control arm were defined as those randomised to that arm who did not  
35 complete any activities or questionnaires through the app. For the AT analysis, participants  
36 who completed at least one activity or questionnaire through the app, independent of their  
37 allocation arm, were regarded as those exposed to the intervention. Participants who did not  
38 complete any activities or questionnaires through the application, independent of their  
39 allocation arm, were regarded as non-exposed to the intervention.  
40  
41  
42  
43  
44  
45  
46  
47  
48  
49  
50  
51  
52  
53  
54

55 For the main analysis, participants lost to follow-up (those who did not answer the  
56 questionnaires) were defined as smokers, as previously recommended (7,21,24), whereas the  
57  
58  
59  
60

1  
2  
3 secondary analysis only considered participants who were not lost to follow-up. Multivariate  
4 analyses, adjusted for baseline characteristics, were performed in the PP and AT populations.  
5  
6 To compare the effects of the e-TIS app on smoking cessation in terms of low versus high  
7  
8 levels of e-TIS use, participants were categorised based on median use in the present study:  
9  
10 i.e., the completion of eight activities or questionnaires through the app.  
11  
12

13  
14 Some subgroup analyses were conducted as defined in the study protocol (13). Other  
15  
16 subgroup analyses were added to the initial protocol (before the blinding was lifted): tobacco  
17  
18 status at inclusion and plans to have or adopt a child in the following year. Sensitivity  
19  
20 analyses were performed using only data from participants with a smoking status at 6 months,  
21  
22 without data recovery based on 3-month and/or 12-month smoking status. All statistical  
23  
24 analyses were performed in 2019 using SAS 9.4 Software (SAS Institute; Cary, NC, USA).  
25  
26  
27  
28  
29

### 30 **Ethical considerations**

31  
32 All participants were required to provide informed consent prior to inclusion in the study and  
33  
34 were informed that they could refuse and drop out at any time. The study protocol was  
35  
36 reviewed by the Ethical and Deontological Institutional Review Board of the Institut National  
37  
38 de Veille Sanitaire on 18 April 2016. All recommendations from the committee were  
39  
40 integrated into the amended version of the protocol.  
41  
42  
43  
44  
45  
46

### 47 **Patient and Public Involvement**

48  
49 Patients or the public were not involved in the design, or conduct, or reporting, or  
50  
51 dissemination of our research.  
52  
53  
54  
55

## 56 **Results**

### 57 **Recruitment and baseline characteristics**

58  
59  
60

1  
2  
3 **Figure 1** displays the flow chart of the randomisation and follow-up procedures. A total of  
4  
5 2806 participants with inclusion data were randomised for the present study; of these, 1400  
6  
7 were allocated to the e-TIS arm and 1406 were allocated to the control arm. Based on the  
8  
9 recovery of missing data, 518 and 602 participants were followed up at 6 months in the e-TIS  
10  
11 and control arms, respectively. **Figure 1** shows contamination between the groups.  
12  
13 Specifically, of the 1400 participants in the e-TIS arm, 787 were exposed to the app, whereas  
14  
15 613 participants were considered to not have been exposed to the app; the 3-month and 6-  
16  
17 month usage rates for the app were 10.7% and 5.7% respectively. Of the 1406 participants in  
18  
19 the control arm, 1127 participants were not exposed to the app, whereas 279 participants were  
20  
21 considered to have been exposed to the app. The ITT, PP, and AT populations used to assess  
22  
23 the primary outcome at 6 months in each arm are displayed in **Figure 1**.

24  
25  
26  
27  
28 The baseline characteristics of the participants and their exposure levels to the e-TIS app are  
29  
30 presented in **Supplementary Table 1**. Of the total participants, most were women, aged 45  
31  
32 years or younger, and current smokers. There were no significant differences between the  
33  
34 groups at baseline.  
35  
36

### 37 38 39 **Primary outcome**

40  
41  
42 There were no differences in PPA at 6 months between the e-TIS and control arms in the ITT,  
43  
44 PP, and AT populations (**Table 1**). When considering only respondents in the total  
45  
46 population, 32.9% and 32.4% of participants were quitters in the ITT/AT and PP populations,  
47  
48 respectively. When considering non-respondents as smokers, 13.1% and 12.9% of the  
49  
50 participants, respectively, were quitters. There were no significant differences in the primary  
51  
52 outcome between participants exposed to the e-TIS and participants not exposed to e-TIS in  
53  
54 the PP and AT populations (**Table 2**).  
55  
56  
57  
58  
59  
60

## Secondary outcomes

There were no significant differences in any of the secondary outcomes between the e-TIS and control arms in the ITT population (**Supplementary Table 2**).

## High level of e-TIS use

**Table 3** presents the group differences in the primary outcome in the PP and AT populations after considering exposure to the e-TIS. In the PP population when considering non-respondents as smokers, 17.6% of participants in the e-TIS high exposure group were quitters, compared to 12.9% in the control group ( $p = 0.0169$ ). In the AT population when considering non-respondents as smokers, 18.2% of the participants in the e-TIS high exposure group were quitters, compared to 11.8% in the other group ( $p < 0.0001$ ).

## Sensitivity analysis

Sensitivity analyses were performed using participants with data at 6 months (no recovery data were used); **Supplementary Figure 1** presents the corresponding diagram flow. These results were similar to those of the main analysis (**Supplementary Table 3**).

## Subgroup analyses

**Supplementary Figure 2** illustrates the subgroup analyses performed using the ITT population, which considered non-respondents as smokers. There were no differences in the minimum 7-day PPA between the e-TIS and control arms in any of the identified subgroups.

Similar results were obtained in the ITT population when only respondents were considered, as well as in the PP and AT populations (both cases: non-respondents were considered as smokers and only considering respondents) with the following exceptions (supplementary tables 4a-r). In the AT population and among smokers at inclusion, quitters were



1  
2  
3 overrepresented among the e-TIS participants, relative to participants who were not exposed  
4 to the e-TIS. Therefore, when considering non-respondents as smokers, 11.2% (n = 80) of the  
5 e-TIS participants were quitters, compared to 8.0% (n = 93) of the participants who were not  
6 exposed to the e-TIS (p = 0.0193). Similar results were obtained when analyses were  
7 performed using participants with no recovery data at 6 months in the ITT, PP, and AT  
8 populations.  
9  
10  
11  
12  
13  
14  
15  
16  
17  
18

## 19 Discussion

20  
21 The present study evaluated the effectiveness of the theory-based smoking cessation e-TIS  
22 app. This study was a randomised controlled trial under pragmatic conditions, which enabled  
23 evaluation of the effectiveness of e-TIS in real-life situations. The pragmatic situation is  
24 particularly relevant for behaviour change interventions (25). Indeed, for these interventions,  
25 determinants of choice to participate in the trial may also be determinants of outcome (e.g.,  
26 motivation). This type of intervention may thus have more favourable results within a trial  
27 than in a real-life situation (13). It is to limit this major bias that we wanted the inclusion  
28 procedure to be the lightest possible in order to recruit smokers who were not selected  
29 because of their high motivation to participate in a trial. The major disadvantage of this  
30 methodological choice is the high attrition rate we observed. Although a high rate of attrition  
31 is quite common in investigations of mHealth tools (26,27), ours is particularly high.  
32  
33  
34  
35  
36  
37  
38  
39  
40  
41  
42  
43  
44  
45

46 Moreover, the present findings may have been influenced by high levels of contamination  
47 between the study arms due to the unrestricted availability of the e-TIS from app stores during  
48 the trial. Our results according to the three types of analysis (i.e. ITT, PP, AT) are consistent,  
49 which is in favour of the robustness of our results in this regard.  
50  
51  
52  
53  
54

55 The primary outcome was point prevalence abstinence (PPA) at 6-month. This is the  
56 recommended duration. It is justified by the high rate of short-term relapse during smoking  
57  
58  
59  
60

1  
2  
3 cessation. (24). PPA is considered to be the most appropriate measure for evaluating  
4  
5 abstinence in intervention evaluation studies (20). The continuous abstinence, recommended  
6  
7 in clinical trials (24) is not relevant in this context because a planned cessation date was not a  
8  
9 criterion for inclusion and patients could stop smoking at any time during follow-up.  
10  
11 However, we have retained it as a secondary outcome and results remained unchanged with  
12  
13 this outcome. Similarly, our imputation procedures to account for missing data did not change  
14  
15 results as shown in sensitivity analyses.  
16  
17

18  
19 Because the trial is not conclusive given its limitations and because the present results may be  
20  
21 explained by multiple hypotheses, the next step of our study will consist of the performance  
22  
23 of a process evaluation (28) using behavioural change techniques taxonomy (29,30), in order  
24  
25 to better understand the e-TIS mechanisms and conditions of efficacy. These conditions relate  
26  
27 to the participants; the different components of e-TIS used by the participants; the  
28  
29 psychological, social and environmental factors possibly affecting the participants during the  
30  
31 study (13).  
32  
33

34  
35 As expected, the participants were mostly young and had a high level of education (31),  
36  
37 which is consistent with the nature of the digital intervention (32). Furthermore, more women  
38  
39 agreed to participate. Similar rates of female participants were observed in the trials reviewed  
40  
41 by Whittaker et al. (2) that employed similar methods of inclusion (33–35).  
42  
43

44  
45 The present study also revealed a high rate of smoking cessation among all participants.  
46  
47 Notably, the rates observed in this study were higher than those in a previous French trial that  
48  
49 evaluated the previous TIS modality, which employed email coaching (32.9% in present  
50  
51 study vs. 24.7%) (36). When considering non-respondents as smokers, 12.6% and 13.7% of  
52  
53 participants in the e-TIS and control arms, respectively, were quitters. Previous studies have  
54  
55 reported that 9% of intervention group populations and 5-6% of control group populations are  
56  
57 quitters (2). It is important to note that the control arm in the present study may not have been  
58  
59  
60

1  
2  
3 considered a true control arm; importantly, the original e-TIS protocol submitted to the ethical  
4 committee planned to compare the e-TIS arm with a control arm (no intervention other than  
5 standard practices). However, the committee suggested that the control participants be  
6 exposed to best evidence-based practices currently in use (15). Thus, the Quitting page of the  
7 French National Mandatory Health Insurance website (Ameli) was suggested to the control  
8 participants, and some of these participants may have used the various smoking cessation  
9 resources which are all considered to be effective. For example, at 6 months, 36.4% of  
10 participants in the control arm had used nicotine replacement therapies within the previous 3  
11 months.  
12

13  
14 The present study also revealed a lack of differences between the e-TIS and control arms in  
15 the ITT, PP, and AT populations. In a Cochrane systematic review conducted in 2014,  
16 Whittaker et al. (2) concluded that mobile phone-based smoking cessation interventions had a  
17 beneficial impact on 6-month outcomes (relative risk [RR]: 1.67, 95% confidence interval  
18 [CI]: 1.46 to 1.90;  $I^2 = 59\%$ ; 12 studies included). However, most studies included in that  
19 review employed short message service text messaging-based interventions, rather than  
20 complex apps; notably, more complex apps use text messaging and other forms of contact.  
21 Therefore, direct comparisons between these results may be inappropriate.  
22

23  
24 Similar to the findings of recent studies that investigated the effectiveness of complex apps  
25 (37,38), the present results showed that the results in the intervention and control arms did not  
26 differ at 6 months. Baskerville et al. (37) compared the effectiveness of an evidence-informed  
27 self-help guide with a non-intervention arm, which may explain the absence of differences in  
28 both arms, and Garrison et al. (38). evaluated a mindfulness training app. Although there were  
29 no group differences in smoking abstinence at 6 months, the intervention app reduced the  
30 associations between craving and smoking, compared to the control app. In contrast, BinDhim  
31 et al. (39) reported that individuals exposed to a smartphone-based decision aid were  
32  
33  
34  
35  
36  
37  
38  
39  
40  
41  
42  
43  
44  
45  
46  
47  
48  
49  
50  
51  
52  
53  
54  
55  
56  
57  
58  
59  
60

1  
2  
3 significantly more likely to exhibit continuous abstinence at 6 months than those exposed to  
4 an information-only app. In that study, the intervention app was required to display  
5 information regarding quitting options, whereas the control app was not required to display  
6 this information.  
7  
8  
9  
10

11  
12 Furthermore, Brown et al. (22) found that the StopAdvisor app was more effective than an  
13 information-only website for helping participants with a low socioeconomic status stop  
14 smoking; it is important to note that this study was designed with sufficient power to  
15 separately assess effectiveness within each socioeconomic status subsample. In the present  
16 study, there were no differences according to socioeconomic status, based on the reported  
17 level of education. Additionally, in the StopAdvisor study, the authors noted that the control  
18 website was used less regularly than the StopAdvisor website in terms of logins, page views,  
19 and time spent on the website. At the 6-month follow-up assessment in the present study,  
20 several of the control participants reported that they had been using other forms of smoking  
21 cessation support in the 3 previous months (e.g., use of nicotine replacement therapies and/or  
22 consultation with a healthcare professional). This could explain the high smoking cessation  
23 rate in the present control group (13.7%) versus that in the StopAdvisor study (10%).  
24  
25  
26  
27  
28  
29  
30  
31  
32  
33  
34  
35  
36  
37  
38  
39

40 Moreover, the effects of health apps remain controversial because they are influenced by  
41 numerous factors related to the app components, characteristics of the users (e.g., motivation,  
42 previous attempts to quit, and uniformity), and the environment of the participant (e.g., social  
43 support). As a result, some authors have advocated for the use of process evaluations to  
44 complement the effectiveness evaluations when assessing this 'black box' (5,40,41).  
45  
46  
47  
48  
49  
50

51 The present study also found that the numbers of quitters in the PP and AT populations at 6  
52 months were higher among participants exposed to the e-TIS, compared to those not exposed  
53 to the app, when e-TIS exposure was defined as the completion of at least eight activities  
54 and/or questionnaires (i.e., the median exposure). It is tempting to conclude that the e-TIS  
55  
56  
57  
58  
59  
60

1  
2  
3 was effective if used intensively, which would be consistent with previous results on the  
4 relationship between use frequency and efficacy (5,42). However, it is likely that the most  
5 motivated participants used the app for a longer time; this motivation, rather than the duration  
6 or frequency of use, would have improved the results. This idea is consistent with the findings  
7 of prior studies, in which the most motivated people were those who used the apps more  
8 frequently (5,43). In the same way it is possible that it is a feed-back loop between  
9 engagement and effectiveness (44). However, in our population, there is no relationship  
10 between motivation at inclusion and subsequent use (data not shown), which is an argument  
11 for the effectiveness of exposure to the application. That remains to be confirmed.  
12  
13  
14  
15  
16  
17  
18  
19  
20  
21  
22  
23  
24  
25

## 26 **Conclusions**

27  
28 In the present study, use of the e-TIS app was not associated with a higher rate of smoking  
29 cessation. However, high level of exposure to the e-TIS app may have been more effective  
30 than current practices.  
31  
32  
33  
34  
35  
36

## 37 **Authors' contributions**

38  
39 LC and FA managed the scientific coordination of the study, AL performed the statistical  
40 analyses, and AA prepared the first draft. Other authors were involved in the study and  
41 contributed to the interpretation of the results. All authors reviewed and contributed to the  
42 article.  
43  
44  
45  
46  
47  
48  
49  
50  
51

## 52 **References**

- 53  
54  
55  
56 1. GBD 2015 Tobacco Collaborators. Smoking prevalence and attributable disease  
57 burden in 195 countries and territories, 1990-2015: a systematic analysis from the Global  
58 Burden of Disease Study 2015. *Lancet Lond Engl*. 2017 May 13;389(10082):1885–906.  
59 2. Whittaker R, McRobbie H, Bullen C, Rodgers A, Gu Y. Mobile phone-based  
60 interventions for smoking cessation. *Cochrane Database Syst Rev*. 2016 Apr 10;4:CD006611.

3. Haskins BL, Lesperance D, Gibbons P, Boudreaux ED. A systematic review of smartphone applications for smoking cessation. *Transl Behav Med.* 2017;7(2):292–9.
4. Ubhi HK, Kotz D, Michie S, et al. Comparative analysis of smoking cessation smartphone applications available in 2012 versus 2014. *Addict Behav.* 2016 Jul;58:175–81.
5. Aromatario O, Van Hoya A, Vuillemin A, et al. How do mobile health applications support behaviour changes? A scoping review of mobile health applications relating to physical activity and eating behaviours. *Public Health.* 2019 Oct 1;175:8–18.
6. Tabac Info Service. Webpage for e-TIS intervention downloading. [Internet]. [cited 2019 Sep 16]. Available from: <https://www.tabac-info-service.fr/J-arrete-de-fumer/Je-telecharge-l-ecoaching>
7. Civljak M, Stead LF, Hartmann-Boyce J, Sheikh A, Car J. Internet-based interventions for smoking cessation. *Cochrane Database Syst Rev.* 2013 Jul 10;(7):CD007078.
8. Prochaska JO, DiClemente CC. Stages of change in the modification of problem behaviors. *Prog Behav Modif.* 1992;28:183–218.
9. Bandura A. Human agency in social cognitive theory. *Am Psychol.* 1989 Sep;44(9):1175–84.
10. Miller WR, Rollnick S. *Motivational interviewing: preparing people for change.* Guildford Press; 2002. 456 p.
11. Miller WR, Rose GS. Toward a Theory of Motivational Interviewing. *Am Psychol.* 2009 Sep;64(6):527–37.
12. Janis IL, Mann L. Emergency decision making: a theoretical analysis of responses to disaster warnings. *J Human Stress.* 1977 Jun;3(2):35–45.
13. Cambon L, Bergman P, Le Faou A, et al. Study protocol for a pragmatic randomised controlled trial evaluating efficacy of a smoking cessation e-Tabac Info Service': ee-TIS trial. *BMJ Open.* 2017 24;7(2):e013604.
14. Eysenbach G, Group C-E. CONSORT-EHEALTH: Improving and Standardizing Evaluation Reports of Web-based and Mobile Health Interventions. *J Med Internet Res.* 2011;13(4):e126.
15. Haute Autorité de Santé. Arrêt de la consommation de tabac: du dépistage individuel au maintien de l'abstinence ne premier recours. Recommandations [Internet]. 2014 Oct [cited 2017 Feb 7]. Available from: [https://www.has-sante.fr/portail/upload/docs/application/pdf/2014-11/recommandations\\_-\\_arret\\_de\\_la\\_consommation\\_de\\_tabac\\_octobre\\_2014\\_2014-11-17\\_14-13-23\\_985.pdf](https://www.has-sante.fr/portail/upload/docs/application/pdf/2014-11/recommandations_-_arret_de_la_consommation_de_tabac_octobre_2014_2014-11-17_14-13-23_985.pdf)
16. Marlatt GA, Gordon J. Determinants of relapse: Implications for the maintenance of behavior change. In: *Behavioral Medicine: Changing health lifestyles.* New York: Brunner/Mazel. Davidson PO, Davidson SM.; 1980. p. 410–52.
17. Hendershot CS, Witkiewitz K, George WH, Marlatt GA. Relapse prevention for addictive behaviors. *Subst Abuse Treat Prev Policy.* 2011 Jul 19;6:17.
18. Beauregard L, Dumont S. La mesure du soutien social. *Serv Soc;* 1996.
19. Velicer WF, Prochaska JO, Rossi JS, Snow MG. Assessing outcome in smoking cessation studies. *Psychol Bull.* 1992 Jan;111(1):23–41.
20. Hughes JR, Keely JP, Niaura RS, Ossip-Klein DJ, Richmond RL, Swan GE. Measures of abstinence in clinical trials: issues and recommendations. *Nicotine Tob Res Off J Soc Res Nicotine Tob.* 2003 Feb;5(1):13–25.
21. European Medicines Agency. Guideline on Treatment of Smoking [Internet]. 2009 [cited 2018 Feb 7]. Available from: [http://www.ema.europa.eu/docs/en\\_GB/document\\_library/Scientific\\_guideline/2009/09/WC500003509.pdf](http://www.ema.europa.eu/docs/en_GB/document_library/Scientific_guideline/2009/09/WC500003509.pdf)
22. Brown J, Michie S, Geraghty AWA, et al. Internet-based intervention for smoking cessation (StopAdvisor) in people with low and high socioeconomic status: a randomised

- controlled trial. *Lancet Respir Med*. 2014 Dec;2(12):997–1006.
23. Dupont WD, Plummer WD. Power and sample size calculations. A review and computer program. *Control Clin Trials*. 1990 Apr;11(2):116–28.
24. West R, Hajek P, Stead L, Stapleton J. Outcome criteria in smoking cessation trials: proposal for a common standard. *Addict Abingdon Engl*. 2005 Mar;100(3):299–303.
25. Troxel AB, Asch DA, Volpp KG. Statistical issues in pragmatic trials of behavioral economic interventions. *Clin Trials*. 2016;13(5):478–483. doi:10.1177/1740774516654862
26. Gordon JS, Armin J, D. Hingle M, et al. Development and evaluation of the See Me Smoke-Free multi-behavioral mHealth app for women smokers. *Transl Behav Med*. 2017 Jun;7(2):172–84.
27. Pellegrini CA, Verba SD, Otto AD, Helsel DL, Davis KK, Jakicic JM. The comparison of a technology-based system and an in-person behavioral weight loss intervention. *Obes Silver Spring Md*. 2012 Feb;20(2):356–63.
28. Craig P, Dieppe P, Macintyre S, et al. Developing and evaluating complex interventions: the new Medical Research Council guidance. *BMJ*. 2008 Sep 29;337:a1655.
29. Michie S, Wood CE, Johnston M, Abraham C, Francis JJ, Hardeman W. Behaviour change techniques: the development and evaluation of a taxonomic method for reporting and describing behaviour change interventions (a suite of five studies involving consensus methods, randomised controlled trials and analysis of qualitative data). *Health Technol Assess Winch Engl*. 2015 Nov;19(99):1–188.
30. Michie S, Richardson M, Johnston M, et al. The behavior change technique taxonomy (v1) of 93 hierarchically clustered techniques: building an international consensus for the reporting of behavior change interventions. *Ann Behav Med Publ Soc Behav Med*. 2013 Aug;46(1):81–95.
31. Guignard R, Richard J, Pasquereau A, et al. Tentatives d'arrêt du tabac au dernier trimestre 2016 et lien avec Mois sans tabac : premiers résultats observés dans le Baromètre santé 2017. *Bull Epidémiol Hebd*. 2018;298–303.
32. Krebs P, Duncan DT. Health App Use Among US Mobile Phone Owners: A National Survey. *JMIR MHealth UHealth [Internet]*. 2015 Nov 4;3(4). Available from: <https://www.ncbi.nlm.nih.gov/pmc/articles/PMC4704953/>
33. Balmford J, Borland R, Benda P, Howard S. Factors associated with use of automated smoking cessation interventions: findings from the eQuit study. *Health Educ Res*. 2013 Apr;28(2):288–99.
34. Abrams LC, Boal AL, Simmens SJ, Mendel JA, Windsor RA. A randomized trial of Text2Quit: a text messaging program for smoking cessation. *Am J Prev Med*. 2014 Sep;47(3):242–50.
35. Bock B, Heron K, Jennings E, et al. A Text Message Delivered Smoking Cessation Intervention: The Initial Trial of TXT-2-Quit: Randomized Controlled Trial. *JMIR MHealth UHealth [Internet]*. 2013 Jul 30;1(2). Available from: <https://www.ncbi.nlm.nih.gov/pmc/articles/PMC4114437/>
36. Nguyen Thanh V, Guignard R, Lancrenon S, et al. Effectiveness of a Fully Automated Internet-Based Smoking Cessation Program: A Randomized Controlled Trial (STAMP). *Nicotine Tob Res Off J Soc Res Nicotine Tob*. 2019 04;21(2):163–72.
37. Baskerville NB, Struik LL, Guindon GE, et al. Effect of a Mobile Phone Intervention on Quitting Smoking in a Young Adult Population of Smokers: Randomized Controlled Trial. *JMIR MHealth UHealth*. 2018 Oct 23;6(10):e10893.
38. Garrison KA, Pal P, O'Malley SS, et al. Craving to Quit: A Randomized Controlled Trial of Smartphone app-based Mindfulness Training for Smoking Cessation. *Nicotine Tob Res Off J Soc Res Nicotine Tob*. 2018 Jun 18;
39. BinDhim NF, McGeechan K, Trevena L. Smartphone Smoking Cessation Application (SSC App) trial: a multicountry double-blind automated randomised controlled trial of a smoking cessation decision-aid 'app'. *BMJ Open*. 2018 21;8(1):e017105.

- 1  
2  
3 40. Cambon L. Health smart devices and applications...towards a new model of  
4 prevention? *Eur J Public Health*. 2017 Jun 1;27(3):390–1.  
5 41. Petit A, Cambon L. Exploratory study of the implications of research on the use of  
6 smart connected devices for prevention: a scoping review. *BMC Public Health* [Internet].  
7 2016 Jul 11 [cited 2019 Sep 16];16. Available from:  
8 <https://www.ncbi.nlm.nih.gov/pmc/articles/PMC4940750/>  
9 42. Vaghefi I, Tulu B. The Continued Use of Mobile Health Apps: Insights From a  
10 Longitudinal Study. *JMIR MHealth UHealth*. 2019;7(8):e12983.  
11 43. Brown J, Michie S, Raupach T, West R. Prevalence and Characteristics of Smokers  
12 Interested in Internet-Based Smoking Cessation Interventions: Cross-sectional Findings From  
13 a National Household Survey. *J Med Internet Res*. 2013;15(3):e50.  
14 44. Perski O, Blandford A, West R, Michie S. Conceptualising engagement with digital  
15 behaviour change interventions: a systematic review using principles from critical interpretive  
16 synthesis. *Transl Behav Med*. 2017 Jun;7(2):254-267.  
17  
18  
19  
20  
21  
22  
23  
24  
25  
26  
27  
28  
29  
30  
31  
32  
33  
34  
35  
36  
37  
38  
39  
40  
41  
42  
43  
44  
45  
46  
47  
48  
49  
50  
51  
52  
53  
54  
55  
56  
57  
58  
59  
60



**Table 1:** Between-group differences in the primary outcome (minimum of 7-day PPA at 6 months) in the ITT, PP, and AT analyses.

| ITT POPULATION                                                 |                   |      |                              |      |                                                 |      |        |
|----------------------------------------------------------------|-------------------|------|------------------------------|------|-------------------------------------------------|------|--------|
|                                                                | Total<br>n = 2806 |      | e-TIS<br>n = 1400<br>(49.9%) |      | Control<br>n = 1406<br>(50.1%)                  |      | p*     |
|                                                                | n                 | %    | n                            | %    | n                                               | %    |        |
| <b>Minimum of 7-day PPA at 6 months (n = 1120)<sup>1</sup></b> |                   |      |                              |      |                                                 |      | 0.4593 |
| Smokers                                                        | 752               | 67.1 | 342                          | 66.0 | 410                                             | 68.1 |        |
| Quitters                                                       | 368               | 32.9 | 176                          | 34.0 | 192                                             | 31.9 |        |
| <b>Minimum of 7-day PPA at 6 months (n = 2806)<sup>2</sup></b> |                   |      |                              |      |                                                 |      | 0.3949 |
| Smokers                                                        | 2438              | 86.9 | 1224                         | 87.4 | 1214                                            | 86.3 |        |
| Quitters                                                       | 368               | 13.1 | 176                          | 12.6 | 192                                             | 13.7 |        |
| PP POPULATION                                                  |                   |      |                              |      |                                                 |      |        |
|                                                                | Total<br>n = 1914 |      | e-TIS<br>n = 787<br>(41.1%)  |      | Control<br>n = 1127<br>(58.9%)                  |      | p*     |
|                                                                | n                 | %    | n                            | %    | n                                               | %    |        |
| <b>Minimum of 7-day PPA at 6 months (n = 759)<sup>1</sup></b>  |                   |      |                              |      |                                                 |      | 0.2196 |
| Smokers                                                        | 513               | 67.6 | 191                          | 65.0 | 322                                             | 69.2 |        |
| Quitters                                                       | 246               | 32.4 | 103                          | 35.0 | 143                                             | 30.8 |        |
| <b>Minimum of 7-day PPA at 6 months (n = 1914)<sup>2</sup></b> |                   |      |                              |      |                                                 |      | 0.7974 |
| Smokers                                                        | 1668              | 87.1 | 684                          | 86.9 | 984                                             | 87.3 |        |
| Quitters                                                       | 246               | 12.9 | 103                          | 13.1 | 143                                             | 12.7 |        |
| AT POPULATION                                                  |                   |      |                              |      |                                                 |      |        |
|                                                                | Total<br>n = 2806 |      | e-TIS<br>n = 1066<br>(38.0%) |      | Non-exposure<br>to e-TIS<br>n = 1740<br>(62.0%) |      | p*     |
|                                                                | n                 | %    | n                            | %    | n                                               | %    |        |
| <b>Minimum of 7-day PPA at 6 months (n = 1120)<sup>1</sup></b> |                   |      |                              |      |                                                 |      | 0.1745 |
| Smokers                                                        | 752               | 67.1 | 279                          | 64.7 | 473                                             | 68.7 |        |
| Quitters                                                       | 368               | 32.9 | 152                          | 35.3 | 216                                             | 31.3 |        |
| <b>Minimum of 7-day PPA at 6 months (n = 2806)<sup>2</sup></b> |                   |      |                              |      |                                                 |      | 0.1599 |
| Smokers                                                        | 2438              | 86.9 | 914                          | 85.7 | 1524                                            | 87.6 |        |
| Quitters                                                       | 368               | 13.1 | 152                          | 14.3 | 216                                             | 12.4 |        |

<sup>1</sup> Only respondents considered

<sup>2</sup> Non-respondents considered as smokers

\* Chi-squared test

e-TIS, e-intervention Tabac Info Service; PPA, point prevalence abstinence

**Table 2:** Minimum of 7-day PPA in the PP and AT populations (multivariate analysis).

|                                                                              | n    | Minimum 7-day PPA at 6 months |      | Multivariate regression <sup>1</sup> |             |        |         |
|------------------------------------------------------------------------------|------|-------------------------------|------|--------------------------------------|-------------|--------|---------|
|                                                                              |      | Quitters                      | %    | Odds ratio                           | CI 95%      |        | p-value |
|                                                                              |      |                               |      |                                      | Lower       | Upper  |         |
| <b>PP POPULATION</b>                                                         |      |                               |      |                                      |             |        |         |
| <b>Only considering respondents (n = 743/759<sup>2</sup>) §</b>              |      |                               |      |                                      |             |        |         |
| Control                                                                      | 453  | 138                           | 30.5 | 1                                    |             | 0.2140 |         |
| e-TIS exposure                                                               | 290  | 102                           | 35.2 | 1.22                                 | 0.89 - 1.67 |        |         |
| <b>Considering non-respondents as smokers (n = 1831/1914<sup>2</sup>) §§</b> |      |                               |      |                                      |             |        |         |
| Non-exposure to e-TIS                                                        | 1080 | 132                           | 12.2 | 1                                    |             | 0.6689 |         |
| e-TIS exposure                                                               | 751  | 99                            | 13.2 | 1.06                                 | 0.80 - 1.41 |        |         |
| <b>AT POPULATION</b>                                                         |      |                               |      |                                      |             |        |         |
| <b>Only considering respondents (n = 1095/1120<sup>2</sup>) §</b>            |      |                               |      |                                      |             |        |         |
| Non-exposure to e-TIS                                                        | 671  | 210                           | 31.3 | 1                                    |             | 0.1882 |         |
| e-TIS exposure                                                               | 424  | 150                           | 35.4 | 1.19                                 | 0.92 - 1.54 |        |         |
| <b>Considering non-respondents as smokers (n = 2679/2806<sup>2</sup>) §§</b> |      |                               |      |                                      |             |        |         |
| Non-exposure to e-TIS                                                        | 1660 | 202                           | 12.2 | 1                                    |             | 0.1449 |         |
| e-TIS exposure                                                               | 1019 | 146                           | 14.3 | 1.19                                 | 0.94 - 1.49 |        |         |

<sup>1</sup> Adjusted for baseline characteristics, with the exception of tobacco status at inclusion. The stepwise variable selection method was used with an input threshold in the model at 0.2 and an output threshold in the model at 0.05. Only factors with a significant association with the 0.2 threshold in the bivariate model were candidates in the multivariate model.

<sup>2</sup> Due to missing data regarding the variables considered in the multivariate model

§ retained variables: expecting a child

§§ retained variables: family situation, level of education, treatment for cardiovascular or respiratory diseases

CI, Confidence interval

**Table 3:** Between-group differences in the primary outcome in the PP and AT populations, which considered exposure to be the completion of at least eight activities or questionnaires through the application.

| PP POPULATION                                               |                   |      |                                                   |      |                                                 |      |                    |
|-------------------------------------------------------------|-------------------|------|---------------------------------------------------|------|-------------------------------------------------|------|--------------------|
|                                                             | Total<br>n = 1652 |      | e-TIS exposure <sup>1</sup><br>n = 409<br>(24.8%) |      | Control<br>n = 1243<br>(75.2%)                  |      | <i>p</i> -value*   |
|                                                             | n                 | %    | n                                                 | %    | n                                               | %    |                    |
| <b>Minimum 7-day PPA at 6 months (n = 704)<sup>2</sup></b>  |                   |      |                                                   |      |                                                 |      | <b>0.0139</b>      |
| Smokers                                                     | 472               | 67.0 | 106                                               | 59.6 | 366                                             | 69.6 |                    |
| Quitters                                                    | 232               | 33.0 | 72                                                | 40.4 | 160                                             | 30.4 |                    |
| <b>Minimum 7-day PPA at 6 months (n = 1652)<sup>2</sup></b> |                   |      |                                                   |      |                                                 |      | <b>0.0169</b>      |
| Smokers                                                     | 1420              | 86.0 | 337                                               | 82.4 | 1083                                            | 87.1 |                    |
| Quitters                                                    | 232               | 14.0 | 72                                                | 17.6 | 160                                             | 12.9 |                    |
| AT POPULATION                                               |                   |      |                                                   |      |                                                 |      |                    |
|                                                             | Total<br>n = 2806 |      | e-TIS exposure <sup>1</sup><br>n = 572<br>(20.4%) |      | Non-exposure<br>to e-TIS<br>n = 2234<br>(79.6%) |      | <i>p</i> -value*   |
|                                                             | n                 | %    | n                                                 | %    | n                                               | %    |                    |
| <b>Minimum 7-day PPA at 6 months (n = 1120)<sup>2</sup></b> |                   |      |                                                   |      |                                                 |      | <b>0.0018</b>      |
| Smokers                                                     | 752               | 67.1 | 150                                               | 59.1 | 602                                             | 69.5 |                    |
| Quitters                                                    | 368               | 32.9 | 104                                               | 40.9 | 264                                             | 30.5 |                    |
| <b>Minimum 7-day PPA at 6 months (n = 2806)<sup>3</sup></b> |                   |      |                                                   |      |                                                 |      | <b>&lt; 0.0001</b> |
| Smokers                                                     | 2438              | 86.9 | 468                                               | 81.8 | 1970                                            | 88.2 |                    |
| Quitters                                                    | 368               | 13.1 | 104                                               | 18.2 | 264                                             | 11.8 |                    |

<sup>1</sup> Completed at least eight activities or questionnaires through the application

<sup>2</sup> Only respondents considered

<sup>3</sup> Non-respondents considered as smokers

\* Chi-squared test

e-TIS, e-intervention Tabac Info Service; PPA, point prevalence abstinence

1  
2  
3 **Figures legends**  
4  
5

6 Figure 1: Diagram depicting the flow of participants in the study (n = 2806).  
7  
8  
9  
10  
11  
12  
13  
14  
15  
16  
17  
18  
19  
20  
21  
22  
23  
24  
25  
26  
27  
28  
29  
30  
31  
32  
33  
34  
35  
36  
37  
38  
39  
40  
41  
42  
43  
44  
45  
46  
47  
48  
49  
50  
51  
52  
53  
54  
55  
56  
57  
58  
59  
60

For peer review only

1  
2  
3  
4  
5  
6  
7  
8  
9  
10  
11  
12

Participants with inclusion data, randomised (n = 2806)

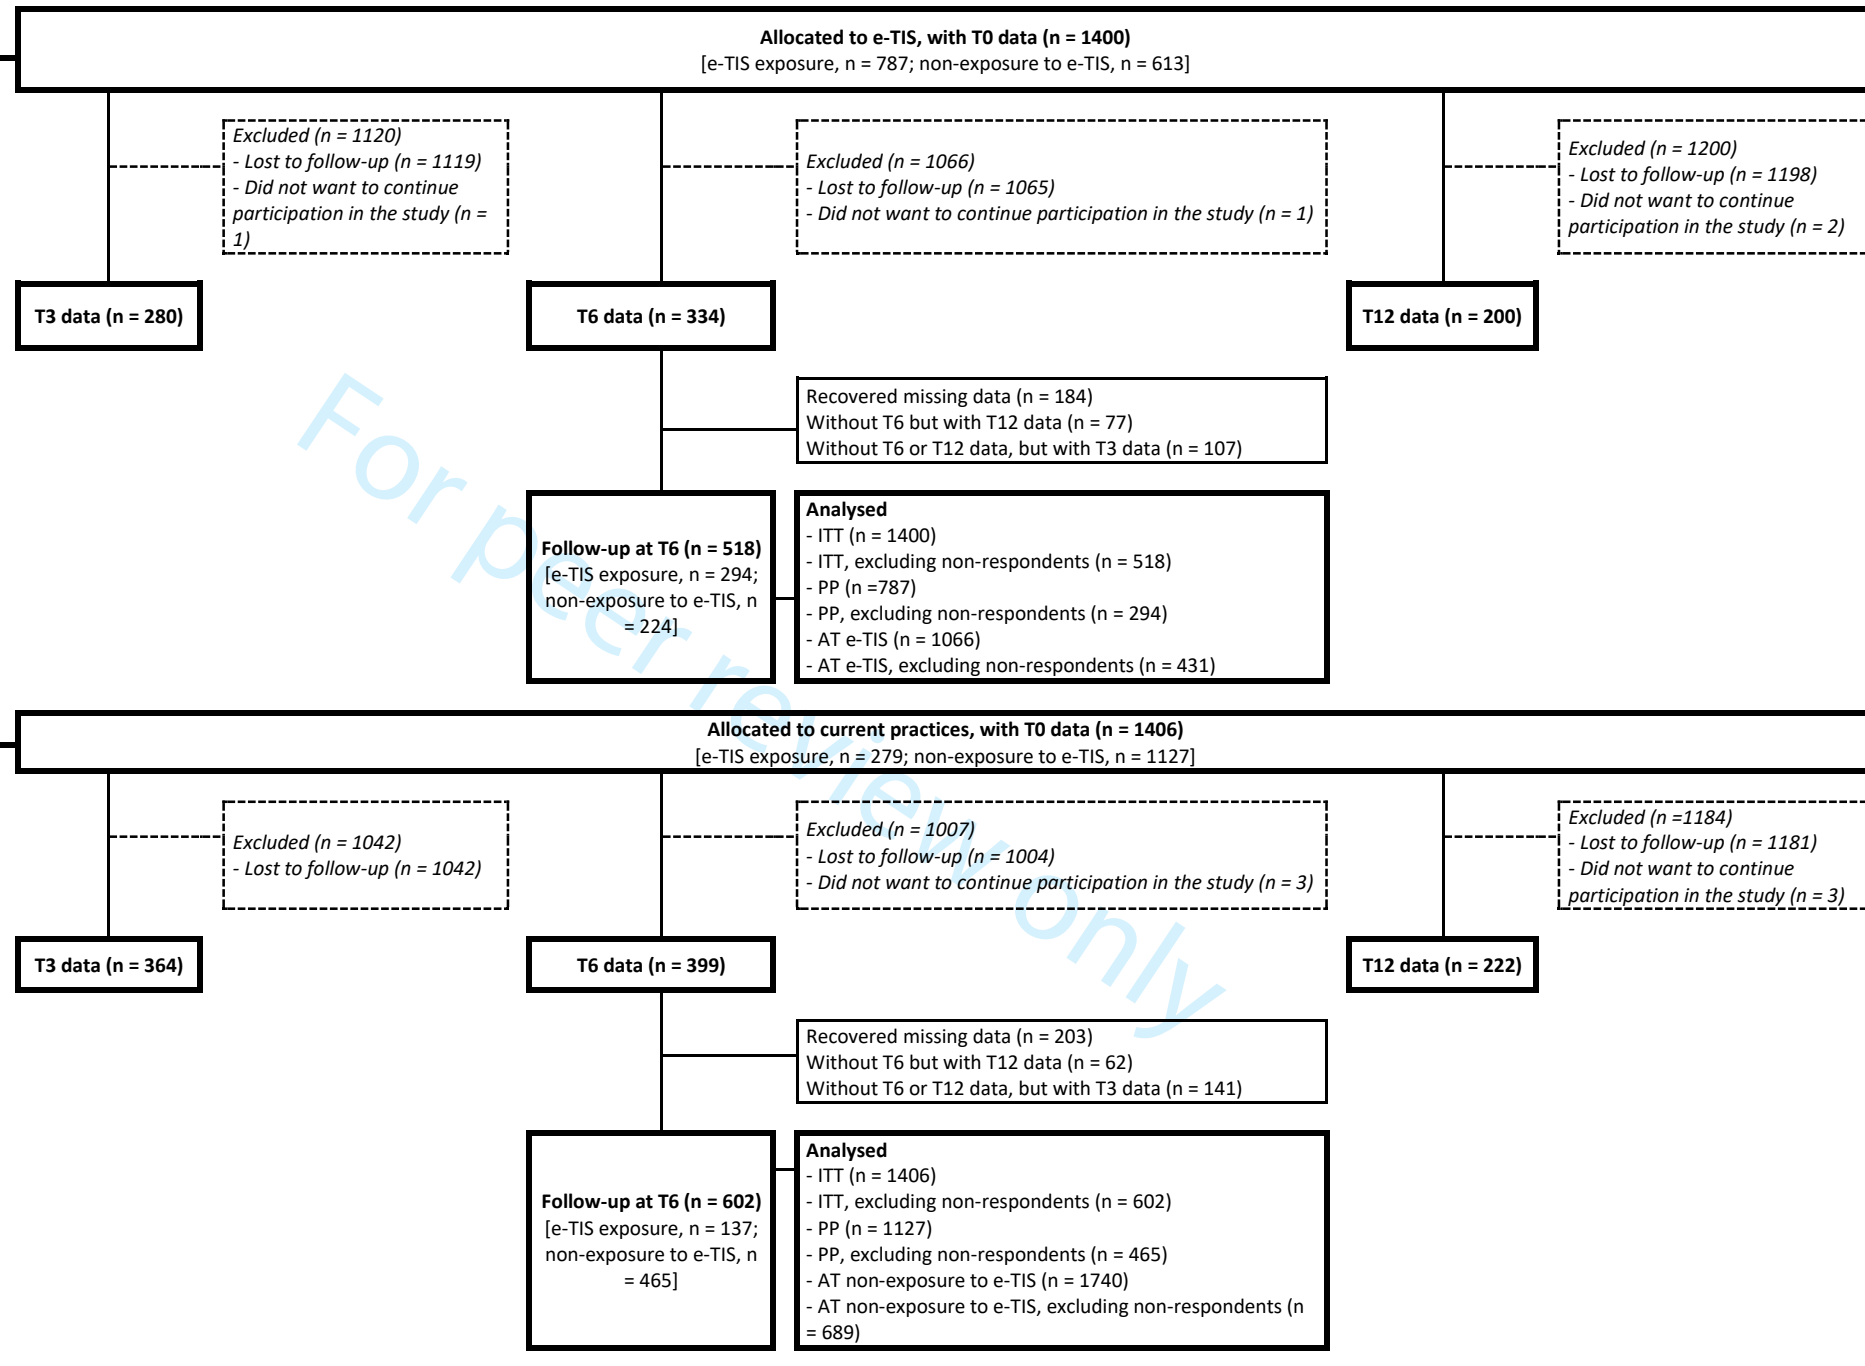

Supplementary Figure 1: Diagram flow of the study with no recovery data at T6.

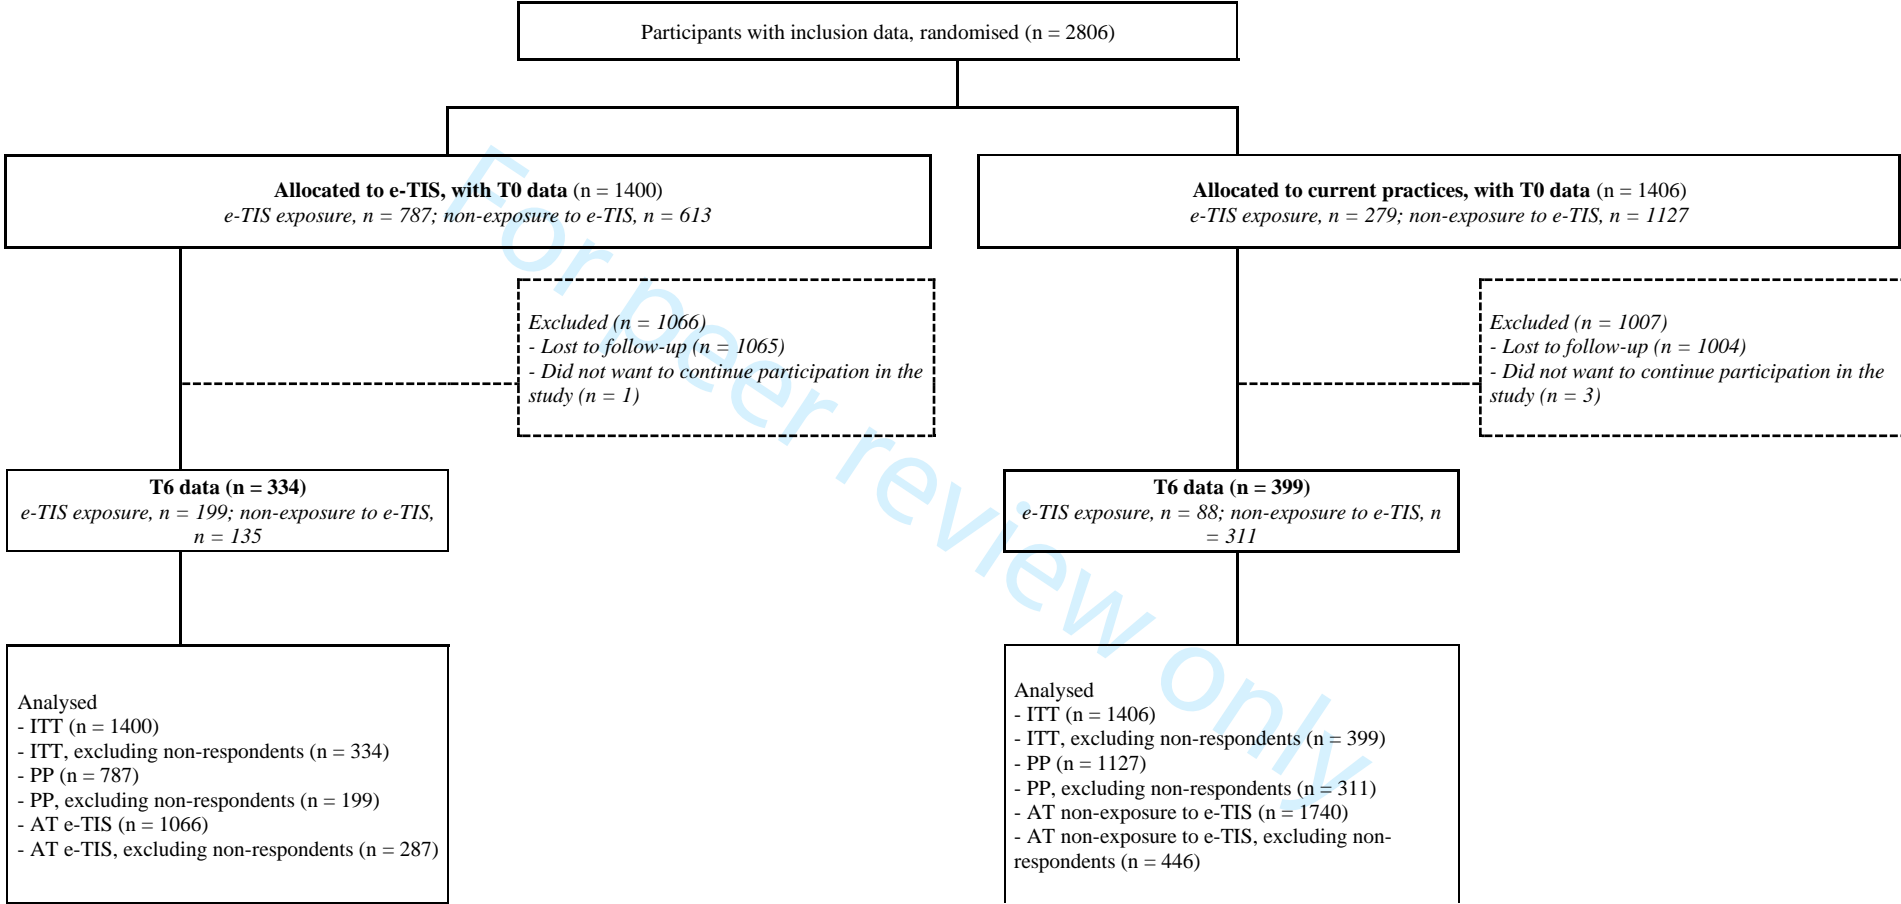

e-TIS, e-intervention Tabac Info Service; ITT, Intention to Treat; PP, Per Protocol; AT, As Treated

**Supplementary Figure 2:** Subgroup analysis in ITT population, considering non-respondents as smokers (n=2806)

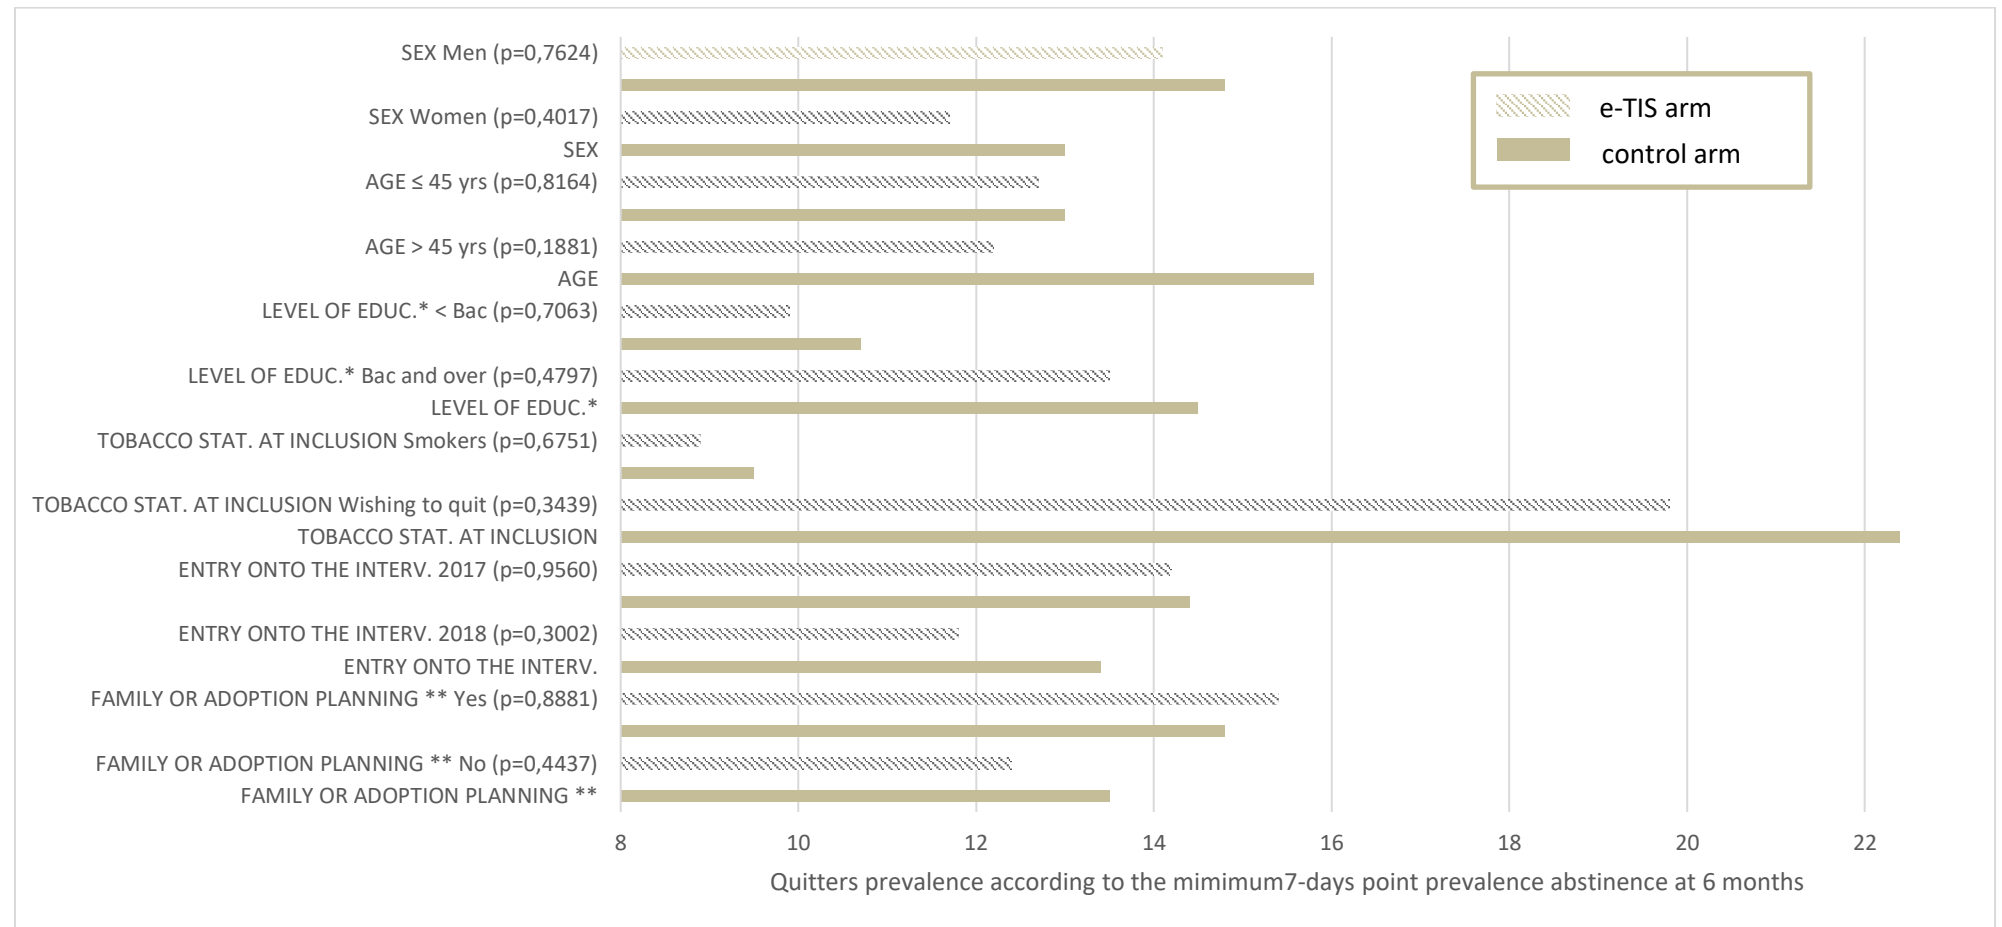

\* n=2786 due to missing data  
 \*\*n=2771 due to missing data  
 P-values are derived from Chi-2 tests

**Supplementary Table 1:** Baseline characteristics of the randomised patients and levels of exposure to the application during the study, according to intervention arm (n = 2806).

|                                                                                | Total<br>n = 2806 |      | e-TIS<br>n = 1400 (49.9%) |      | Control<br>n = 1406 (50.1%) |      | p-value* |
|--------------------------------------------------------------------------------|-------------------|------|---------------------------|------|-----------------------------|------|----------|
|                                                                                | n                 | %    | n                         | %    | n                           | %    |          |
| <b>BASELINE CHARACTERISTICS</b>                                                |                   |      |                           |      |                             |      |          |
| <b>Sex</b>                                                                     |                   |      |                           |      |                             |      | 0.7308   |
| Male                                                                           | 1033              | 36.8 | 511                       | 36.5 | 522                         | 37.1 |          |
| Female                                                                         | 1773              | 63.2 | 889                       | 63.5 | 884                         | 62.9 |          |
| <b>Age</b>                                                                     |                   |      |                           |      |                             |      | 0.9418   |
| ≤ 45 years                                                                     | 2163              | 77.1 | 1080                      | 77.1 | 1083                        | 77.0 |          |
| < 45 years                                                                     | 643               | 22.9 | 320                       | 22.9 | 323                         | 23.0 |          |
| <b>Smoking status at inclusion</b>                                             |                   |      |                           |      |                             |      | 0.5475   |
| Smokers                                                                        | 1881              | 67.0 | 931                       | 66.5 | 950                         | 67.6 |          |
| Wishing to quit                                                                | 925               | 33.0 | 469                       | 33.5 | 456                         | 32.4 |          |
| <b>Living situation</b>                                                        |                   |      |                           |      |                             |      | 0.9570   |
| Single                                                                         | 828               | 29.6 | 414                       | 29.7 | 414                         | 29.6 |          |
| With a partner                                                                 | 1661              | 59.4 | 829                       | 59.4 | 832                         | 59.4 |          |
| With parents                                                                   | 150               | 5.4  | 71                        | 5.1  | 79                          | 5.6  |          |
| With roommates                                                                 | 72                | 2.6  | 38                        | 2.7  | 34                          | 2.4  |          |
| Other                                                                          | 85                | 3.0  | 43                        | 3.1  | 42                          | 3.0  |          |
| Missing data                                                                   | 10                |      | 5                         |      | 5                           |      |          |
| <b>Living with minors</b>                                                      |                   |      |                           |      |                             |      | 0.5344   |
| Yes                                                                            | 1343              | 48.3 | 678                       | 48.8 | 665                         | 47.7 |          |
| No                                                                             | 1440              | 51.7 | 710                       | 51.2 | 730                         | 52.3 |          |
| Missing data                                                                   | 23                |      | 12                        |      | 11                          |      |          |
| <b>Current pregnancy in the couple</b>                                         |                   |      |                           |      |                             |      | 0.6772   |
| Yes                                                                            | 128               | 4.6  | 66                        | 4.8  | 62                          | 4.5  |          |
| No                                                                             | 2645              | 95.4 | 1314                      | 95.2 | 1331                        | 95.5 |          |
| Missing data                                                                   | 33                |      | 20                        |      | 13                          |      |          |
| <b>Pregnancy/adoption within 1 year</b>                                        |                   |      |                           |      |                             |      | 0.1564   |
| Yes                                                                            | 338               | 12.2 | 156                       | 11.3 | 182                         | 13.1 |          |
| No                                                                             | 2433              | 87.8 | 1223                      | 88.7 | 1210                        | 86.9 |          |
| Missing data                                                                   | 35                |      | 21                        |      | 14                          |      |          |
| <b>Level of education</b>                                                      |                   |      |                           |      |                             |      | 0.5847   |
| Less than baccalaureate degree                                                 | 700               | 25.1 | 355                       | 25.6 | 345                         | 24.7 |          |
| Baccalaureate degree or higher                                                 | 2086              | 74.9 | 1033                      | 74.4 | 1053                        | 75.3 |          |
| Missing data                                                                   | 20                |      | 12                        |      | 8                           |      |          |
| <b>Treatment for cardiovascular and/or respiratory diseases</b>                |                   |      |                           |      |                             |      | 0.0556   |
| Yes                                                                            | 426               | 15.5 | 231                       | 16.9 | 195                         | 14.2 |          |
| No                                                                             | 2316              | 84.5 | 1139                      | 83.1 | 1177                        | 85.8 |          |
| Missing data                                                                   | 64                |      | 30                        |      | 34                          |      |          |
| <b>EXPOSURE TO THE APPLICATION DURING THE STUDY</b>                            |                   |      |                           |      |                             |      |          |
| <b>e-TIS downloaded</b>                                                        |                   |      |                           |      |                             |      | < 0.0001 |
| Yes                                                                            | 1139              | 40.6 | 843                       | 60.2 | 296                         | 21.0 |          |
| No                                                                             | 1667              | 59.6 | 557                       | 39.8 | 1110                        | 79.0 |          |
| <b>e-TIS exposure (i.e., completed at least one activity or questionnaire)</b> |                   |      |                           |      |                             |      | < 0.0001 |
| Yes                                                                            | 1066              | 38.0 | 787                       | 56.2 | 279                         | 19.8 |          |
| No                                                                             | 1740              | 62.0 | 613                       | 43.8 | 1127                        | 80.2 |          |

\* Chi-squared test for qualitative variables  
e-TIS, e-intervention Tabac Info Service



**Supplementary Table 2:** Secondary outcomes in the ITT population, which only considered respondents.

|                                                                             | Total |        |      | e-TIS |        |       | Control |        |      | <i>p</i> -value* |
|-----------------------------------------------------------------------------|-------|--------|------|-------|--------|-------|---------|--------|------|------------------|
|                                                                             | n     | %/mean | SD   | n     | %/mean | SD    | n       | %/mean | SD*  |                  |
| <b>Continuous abstinence at 6 months (n = 733)</b>                          |       |        |      |       |        |       |         |        |      | 0.4536           |
| No                                                                          | 441   | 60.2   |      | 196   | 58.7   |       | 245     | 61.4   |      |                  |
| Yes                                                                         | 292   | 39.8   |      | 138   | 41.3   |       | 154     | 38.6   |      |                  |
| <b>Continuous abstinence at 12 months (n = 422)</b>                         |       |        |      |       |        |       |         |        |      | 0.1816           |
| No                                                                          | 198   | 46.9   |      | 87    | 43.5   |       | 111     | 50.0   |      |                  |
| Yes                                                                         | 224   | 53.1   |      | 113   | 56.5   |       | 111     | 50.0   |      |                  |
| <b>Minimum 24-hour point abstinence at 3 months (n = 644)</b>               |       |        |      |       |        |       |         |        |      | 0.1508           |
| No                                                                          | 420   | 65.2   |      | 174   | 62.1   |       | 246     | 67.6   |      |                  |
| Yes                                                                         | 224   | 34.8   |      | 106   | 37.9   |       | 118     | 32.4   |      |                  |
| <b>Minimum 30-day point abstinence at 12 months (n = 422)</b>               |       |        |      |       |        |       |         |        |      | 0.2914           |
| No                                                                          | 258   | 61.1   |      | 117   | 58.5   |       | 141     | 63.5   |      |                  |
| Yes                                                                         | 164   | 38.9   |      | 83    | 41.5   |       | 81      | 36.5   |      |                  |
| <b>Number of quit attempts at T3 (n = 644)</b><br>( <i>n miss</i> = 409)    | 235   | 1.7    | 5.7  | 112   | 1.7    | 6.1   | 123     | 1.6    | 5.4  | 0.9441           |
| <b>Duration of quit attempts at T3 (n = 644)</b><br>( <i>n miss</i> = 442)  | 202   | 58.5   | 45.8 | 95    | 54.8   | 44.8  | 107     | 61.8   | 46.6 | 0.2785           |
| <b>Number of quit attempts at T6 (n = 733)</b><br>( <i>n miss</i> = 447)    | 286   | 1.1    | 1.0  | 134   | 1.0    | 0.8   | 152     | 1.1    | 1.1  | 0.5654           |
| <b>Duration of quit attempts at T6 (n = 733)</b><br>( <i>n miss</i> = 516)  | 217   | 72.5   | 90.5 | 103   | 82.1   | 124.6 | 114     | 64.0   | 38.3 | 0.1414           |
| <b>Number of quit attempts at T12 (n = 422)</b><br>( <i>n miss</i> = 205)   | 217   | 1.7    | 6.6  | 112   | 1.0    | 1.2   | 105     | 2.4    | 9.4  | 0.1327           |
| <b>Duration of quit attempts at T12 (n = 422)</b><br>( <i>n miss</i> = 262) | 160   | 82.9   | 79.8 | 79    | 87.1   | 87.4  | 81      | 78.9   | 71.8 | 0.5205           |

\* Chi-squared test and Wilcoxon test

e-TIS, e-intervention Tabac Info Service; SD, standard deviation

**Supplementary Table 3:** Between-group differences in the primary outcome (minimum 7-day PPA at 6 months) in the ITT, PP and AT populations without considering recovery data at T6.

| ITT POPULATION                                              |                   |      |                              |      |                                             |      |        |
|-------------------------------------------------------------|-------------------|------|------------------------------|------|---------------------------------------------|------|--------|
|                                                             | Total<br>n = 2806 |      | e-TIS<br>n = 1400<br>(49.9%) |      | Control<br>n = 1406<br>(50.1%)              |      | p*     |
|                                                             | n                 | %    | n                            | %    | n                                           | %    |        |
| <b>Minimum 7-day PPA at 6 months (n = 733)<sup>1</sup></b>  |                   |      |                              |      |                                             |      | 0.9195 |
| Smokers                                                     | 477               | 65.1 | 218                          | 65.3 | 259                                         | 64.9 |        |
| Quitters                                                    | 256               | 34.9 | 116                          | 34.7 | 140                                         | 35.1 |        |
| <b>Minimum 7-day PPA at 6 months (n = 2806)<sup>2</sup></b> |                   |      |                              |      |                                             |      | 0.1241 |
| Smokers                                                     | 2550              | 90.9 | 1284                         | 91.7 | 1266                                        | 90.0 |        |
| Quitters                                                    | 256               | 9.1  | 116                          | 8.3  | 140                                         | 10.0 |        |
| PP POPULATION                                               |                   |      |                              |      |                                             |      |        |
|                                                             | Total<br>n = 1914 |      | e-TIS<br>n = 787<br>(41.1%)  |      | Control<br>n = 1127<br>(58.9%)              |      | p*     |
|                                                             | n                 | %    | n                            | %    | n                                           | %    |        |
| <b>Minimum 7-day PPA at 6 months (n = 510)<sup>1</sup></b>  |                   |      |                              |      |                                             |      | 0.6570 |
| Smokers                                                     | 334               | 65.5 | 128                          | 64.3 | 206                                         | 66.2 |        |
| Quitters                                                    | 176               | 34.5 | 71                           | 35.7 | 105                                         | 33.8 |        |
| <b>Minimum 7-day PPA at 6 months (n = 1914)<sup>2</sup></b> |                   |      |                              |      |                                             |      | 0.8260 |
| Smokers                                                     | 1738              | 90.8 | 716                          | 91.0 | 1022                                        | 90.7 |        |
| Quitters                                                    | 176               | 9.2  | 71                           | 9.0  | 105                                         | 9.3  |        |
| AT POPULATION                                               |                   |      |                              |      |                                             |      |        |
|                                                             | Total<br>n = 2806 |      | e-TIS<br>n = 1066<br>(38.0%) |      | Non-exposed to e-TIS<br>n = 1740<br>(62.0%) |      | p*     |
|                                                             | n                 | %    | n                            | %    | n                                           | %    |        |
| <b>Minimum 7-day PPA at 6 months (n = 733)<sup>1</sup></b>  |                   |      |                              |      |                                             |      | 0.3601 |
| Smokers                                                     | 477               | 65.1 | 181                          | 63.1 | 296                                         | 66.4 |        |
| Quitters                                                    | 256               | 34.9 | 106                          | 36.9 | 150                                         | 33.6 |        |
| <b>Minimum 7-day PPA at 6 months (n = 2806)<sup>2</sup></b> |                   |      |                              |      |                                             |      | 0.2375 |
| Smokers                                                     | 2550              | 90.9 | 960                          | 90.1 | 1590                                        | 91.4 |        |
| Quitters                                                    | 256               | 9.1  | 106                          | 9.9  | 150                                         | 8.6  |        |

<sup>1</sup> Only respondents considered<sup>2</sup> Non-respondents considered as smokers

\* Chi-squared test

e-TIS, e-intervention Tabac Info Service; PPA, point prevalence abstinence

Supplementary Table 4a. ITT analyses / age

## Age ≤ 45 years

|                                                                                                                                              | Total<br>N= 2163 |      | Yes<br>N=1080<br>(49,9%) |      | No<br>N=1083<br>(50,1%) |      | p*     |
|----------------------------------------------------------------------------------------------------------------------------------------------|------------------|------|--------------------------|------|-------------------------|------|--------|
|                                                                                                                                              | N                | %    | N                        | %    | N                       | %    |        |
| <b>Minimum 7-day PPA at 6 months</b>                                                                                                         |                  |      |                          |      |                         |      | 0,6422 |
| Smokers                                                                                                                                      | 349              | 64,6 | 159                      | 63,6 | 190                     | 65,5 |        |
| Quitters                                                                                                                                     | 191              | 35,4 | 91                       | 36,4 | 100                     | 34,5 |        |
| <b>Minimum 7-day PPA at 6 months (with the use of 12-month or 3-month smoking status if missing)</b>                                         |                  |      |                          |      |                         |      | 0,0988 |
| Smokers                                                                                                                                      | 555              | 66,6 | 240                      | 63,7 | 315                     | 69,1 |        |
| Quitters                                                                                                                                     | 278              | 33,4 | 137                      | 36,3 | 141                     | 30,9 |        |
| <b>Minimum 7-day PPA at 6 months considering non-respondents as smokers</b>                                                                  |                  |      |                          |      |                         |      | 0,5080 |
| Smokers                                                                                                                                      | 1972             | 91,2 | 989                      | 91,6 | 983                     | 90,8 |        |
| Quitters                                                                                                                                     | 191              | 8,8  | 91                       | 8,4  | 100                     | 9,2  |        |
| <b>Minimum 7-day PPA at 6 months (with the use of 12-month or 3-month smoking status if missing), considering non-respondents as smokers</b> |                  |      |                          |      |                         |      | 0,8164 |
| Smokers                                                                                                                                      | 1885             | 87,1 | 943                      | 87,3 | 942                     | 87,0 |        |
| Quitters                                                                                                                                     | 278              | 12,9 | 137                      | 12,7 | 141                     | 13,0 |        |

## Age &gt; 45 years

|                                                                                                                                              | Total<br>N= 643 |      | Yes<br>N=320<br>(49,8%) |      | No<br>N=323<br>(50,2%) |      | p*     |
|----------------------------------------------------------------------------------------------------------------------------------------------|-----------------|------|-------------------------|------|------------------------|------|--------|
|                                                                                                                                              | N               | %    | N                       | %    | N                      | %    |        |
| <b>Minimum 7-day PPA at 6 months</b>                                                                                                         |                 |      |                         |      |                        |      | 0,3121 |
| Smokers                                                                                                                                      | 128             | 66,3 | 59                      | 70,2 | 69                     | 63,3 |        |
| Quitters                                                                                                                                     | 65              | 33,7 | 25                      | 29,8 | 40                     | 36,7 |        |
| <b>Minimum 7-day PPA at 6 months (with the use of 12-month or 3-month smoking status if missing)</b>                                         |                 |      |                         |      |                        |      | 0,1844 |
| Smokers                                                                                                                                      | 197             | 68,6 | 102                     | 72,3 | 95                     | 65,1 |        |
| Quitters                                                                                                                                     | 90              | 31,4 | 39                      | 27,7 | 51                     | 34,9 |        |
| <b>Minimum 7-day PPA at 6 months considering non-respondents as smokers</b>                                                                  |                 |      |                         |      |                        |      | 0,0545 |
| Smokers                                                                                                                                      | 578             | 89,9 | 295                     | 92,2 | 283                    | 87,6 |        |
| Quitters                                                                                                                                     | 65              | 10,1 | 25                      | 7,8  | 40                     | 12,4 |        |
| <b>Minimum 7-day PPA at 6 months (with the use of 12-month or 3-month smoking status if missing), considering non-respondents as smokers</b> |                 |      |                         |      |                        |      | 0,1881 |
| Smokers                                                                                                                                      | 553             | 86,0 | 281                     | 87,8 | 272                    | 84,2 |        |
| Quitters                                                                                                                                     | 90              | 14,0 | 39                      | 12,2 | 51                     | 15,8 |        |

\* Chi-square test

Supplementary Table 4b. PP analyses / Age

## Age ≤ 45 years

|                                                                                                                                              | Total<br>N= 1502 |      | Yes<br>N=639<br>(42,5%) |      | No<br>N=863<br>(57,5%) |      | p*     |
|----------------------------------------------------------------------------------------------------------------------------------------------|------------------|------|-------------------------|------|------------------------|------|--------|
|                                                                                                                                              | N                | %    | N                       | %    | N                      | %    |        |
| <b>Minimum 7-day PPA at 6 months</b>                                                                                                         |                  |      |                         |      |                        |      | 0,5520 |
| Smokers                                                                                                                                      | 254              | 65,5 | 102                     | 63,8 | 152                    | 66,7 |        |
| Quitters                                                                                                                                     | 134              | 34,5 | 58                      | 36,3 | 76                     | 33,3 |        |
| <b>Minimum 7-day PPA at 6 months (with the use of 12-month or 3-month smoking status if missing)</b>                                         |                  |      |                         |      |                        |      | 0,0673 |
| Smokers                                                                                                                                      | 391              | 67,3 | 144                     | 62,9 | 247                    | 70,2 |        |
| Quitters                                                                                                                                     | 190              | 32,7 | 85                      | 37,1 | 105                    | 29,8 |        |
| <b>Minimum 7-day PPA at 6 months considering non-respondents as smokers</b>                                                                  |                  |      |                         |      |                        |      | 0,8559 |
| Smokers                                                                                                                                      | 1368             | 91,1 | 581                     | 90,9 | 787                    | 91,2 |        |
| Quitters                                                                                                                                     | 134              | 8,9  | 58                      | 9,1  | 76                     | 8,8  |        |
| <b>Minimum 7-day PPA at 6 months (with the use of 12-month or 3-month smoking status if missing), considering non-respondents as smokers</b> |                  |      |                         |      |                        |      | 0,5129 |
| Smokers                                                                                                                                      | 1312             | 87,4 | 554                     | 86,7 | 758                    | 87,8 |        |
| Quitters                                                                                                                                     | 190              | 12,6 | 85                      | 13,3 | 105                    | 12,2 |        |

## Age &gt; 45 years

|                                                                                                                                              | Total<br>N= 412 |      | Yes<br>N=148<br>(35,9%) |      | No<br>N=264<br>(64,1%) |      | p*     |
|----------------------------------------------------------------------------------------------------------------------------------------------|-----------------|------|-------------------------|------|------------------------|------|--------|
|                                                                                                                                              | N               | %    | N                       | %    | N                      | %    |        |
| <b>Minimum 7-day PPA at 6 months</b>                                                                                                         |                 |      |                         |      |                        |      | 0,8617 |
| Smokers                                                                                                                                      | 80              | 65,6 | 26                      | 66,7 | 54                     | 65,1 |        |
| Quitters                                                                                                                                     | 42              | 34,4 | 13                      | 33,3 | 29                     | 34,9 |        |
| <b>Minimum 7-day PPA at 6 months (with the use of 12-month or 3-month smoking status if missing)</b>                                         |                 |      |                         |      |                        |      | 0,4116 |
| Smokers                                                                                                                                      | 122             | 68,5 | 47                      | 72,3 | 75                     | 66,4 |        |
| Quitters                                                                                                                                     | 56              | 31,5 | 18                      | 27,7 | 38                     | 33,6 |        |
| <b>Minimum 7-day PPA at 6 months considering non-respondents as smokers</b>                                                                  |                 |      |                         |      |                        |      | 0,4787 |
| Smokers                                                                                                                                      | 370             | 89,8 | 135                     | 91,2 | 235                    | 89,0 |        |
| Quitters                                                                                                                                     | 42              | 10,2 | 13                      | 8,8  | 29                     | 11,0 |        |
| <b>Minimum 7-day PPA at 6 months (with the use of 12-month or 3-month smoking status if missing), considering non-respondents as smokers</b> |                 |      |                         |      |                        |      | 0,5260 |
| Smokers                                                                                                                                      | 356             | 86,4 | 130                     | 87,8 | 226                    | 85,6 |        |
| Quitters                                                                                                                                     | 56              | 13,6 | 18                      | 12,2 | 38                     | 14,4 |        |

\* Chi-square test

**Supplementary Table 4c. As Treated analyses / Age**

**Age ≤ 45 years**

|                                                                                                                                              | Total<br>N= 2163 |      | Yes<br>N=859<br>(39,7%) |      | No<br>N=1304<br>(60,3%) |      | p*     |
|----------------------------------------------------------------------------------------------------------------------------------------------|------------------|------|-------------------------|------|-------------------------|------|--------|
|                                                                                                                                              | N                | %    | N                       | %    | N                       | %    |        |
| <b>Minimum 7-day PPA at 6 months</b>                                                                                                         |                  |      |                         |      |                         |      | 0,5247 |
| Smokers                                                                                                                                      | 349              | 64,6 | 140                     | 63,1 | 209                     | 65,7 |        |
| Quitters                                                                                                                                     | 191              | 35,4 | 82                      | 36,9 | 109                     | 34,3 |        |
| <b>Minimum 7-day PPA at 6 months (with the use of 12-month or 3-month smoking status if missing)</b>                                         |                  |      |                         |      |                         |      | 0,1389 |
| Smokers                                                                                                                                      | 555              | 66,6 | 212                     | 63,7 | 343                     | 68,6 |        |
| Quitters                                                                                                                                     | 278              | 33,4 | 121                     | 36,3 | 157                     | 31,4 |        |
| <b>Minimum 7-day PPA at 6 months considering non-respondents as smokers</b>                                                                  |                  |      |                         |      |                         |      | 0,3411 |
| Smokers                                                                                                                                      | 1972             | 91,2 | 777                     | 90,5 | 1195                    | 91,6 |        |
| Quitters                                                                                                                                     | 191              | 8,8  | 82                      | 9,5  | 109                     | 8,4  |        |
| <b>Minimum 7-day PPA at 6 months (with the use of 12-month or 3-month smoking status if missing), considering non-respondents as smokers</b> |                  |      |                         |      |                         |      | 0,1641 |
| Smokers                                                                                                                                      | 1885             | 87,1 | 738                     | 85,9 | 1147                    | 88,0 |        |
| Quitters                                                                                                                                     | 278              | 12,9 | 121                     | 14,1 | 157                     | 12,0 |        |

**Age > 45 years**

|                                                                                                                                              | Total<br>N= 643 |      | Yes<br>N=207<br>(32,2%) |      | No<br>N=436<br>(67,8%) |      | p*     |
|----------------------------------------------------------------------------------------------------------------------------------------------|-----------------|------|-------------------------|------|------------------------|------|--------|
|                                                                                                                                              | N               | %    | N                       | %    | N                      | %    |        |
| <b>Minimum 7-day PPA at 6 months</b>                                                                                                         |                 |      |                         |      |                        |      | 0,4968 |
| Smokers                                                                                                                                      | 128             | 66,3 | 41                      | 63,1 | 87                     | 68,0 |        |
| Quitters                                                                                                                                     | 65              | 33,7 | 24                      | 36,9 | 41                     | 32,0 |        |
| <b>Minimum 7-day PPA at 6 months (with the use of 12-month or 3-month smoking status if missing)</b>                                         |                 |      |                         |      |                        |      | 0,9426 |
| Smokers                                                                                                                                      | 197             | 68,6 | 67                      | 68,4 | 130                    | 68,8 |        |
| Quitters                                                                                                                                     | 90              | 31,4 | 31                      | 31,6 | 59                     | 31,2 |        |
| <b>Minimum 7-day PPA at 6 months considering non-respondents as smokers</b>                                                                  |                 |      |                         |      |                        |      | 0,3893 |
| Smokers                                                                                                                                      | 578             | 89,9 | 183                     | 88,4 | 395                    | 90,6 |        |
| Quitters                                                                                                                                     | 65              | 10,1 | 24                      | 11,6 | 41                     | 9,4  |        |
| <b>Minimum 7-day PPA at 6 months (with the use of 12-month or 3-month smoking status if missing), considering non-respondents as smokers</b> |                 |      |                         |      |                        |      | 0,6220 |
| Smokers                                                                                                                                      | 553             | 86,0 | 176                     | 85,0 | 377                    | 86,5 |        |
| Quitters                                                                                                                                     | 90              | 14,0 | 31                      | 15,0 | 59                     | 13,5 |        |

\* Chi-square test

Supplementary Table 4d. ITT analyses / sex

| <b>Men</b>                                                                                                                                   |                  |      |                         |      |                        |      |        |
|----------------------------------------------------------------------------------------------------------------------------------------------|------------------|------|-------------------------|------|------------------------|------|--------|
|                                                                                                                                              | Total<br>N= 1033 |      | Yes<br>N=511<br>(49,5%) |      | No<br>N=522<br>(50,5%) |      | p*     |
|                                                                                                                                              | N                | %    | N                       | %    | N                      | %    |        |
| <b>Minimum 7-day PPA at 6 months</b>                                                                                                         |                  |      |                         |      |                        |      | 0,3631 |
| Smokers                                                                                                                                      | 178              | 61,8 | 76                      | 58,9 | 102                    | 64,2 |        |
| Quitters                                                                                                                                     | 110              | 38,2 | 53                      | 41,1 | 57                     | 35,8 |        |
| <b>Minimum 7-day PPA at 6 months (with the use of 12-month or 3-month smoking status if missing)</b>                                         |                  |      |                         |      |                        |      | 0,3851 |
| Smokers                                                                                                                                      | 271              | 64,5 | 119                     | 62,3 | 152                    | 66,4 |        |
| Quitters                                                                                                                                     | 149              | 35,5 | 72                      | 37,7 | 77                     | 33,6 |        |
| <b>Minimum 7-day PPA at 6 months considering non-respondents as smokers</b>                                                                  |                  |      |                         |      |                        |      | 0,7754 |
| Smokers                                                                                                                                      | 923              | 89,4 | 458                     | 89,6 | 465                    | 89,1 |        |
| Quitters                                                                                                                                     | 110              | 10,6 | 53                      | 10,4 | 57                     | 10,9 |        |
| <b>Minimum 7-day PPA at 6 months (with the use of 12-month or 3-month smoking status if missing), considering non-respondents as smokers</b> |                  |      |                         |      |                        |      | 0,7624 |
| Smokers                                                                                                                                      | 884              | 85,6 | 439                     | 85,9 | 445                    | 85,2 |        |
| Quitters                                                                                                                                     | 149              | 14,4 | 72                      | 14,1 | 77                     | 14,8 |        |
| <b>Women</b>                                                                                                                                 |                  |      |                         |      |                        |      |        |
|                                                                                                                                              | Total<br>N= 1773 |      | Yes<br>N=889<br>(50,1%) |      | No<br>N=884<br>(49,9%) |      | p*     |
|                                                                                                                                              | N                | %    | N                       | %    | N                      | %    |        |
| <b>Minimum 7-day PPA at 6 months</b>                                                                                                         |                  |      |                         |      |                        |      | 0,3884 |
| Smokers                                                                                                                                      | 299              | 67,2 | 142                     | 69,3 | 157                    | 65,4 |        |
| Quitters                                                                                                                                     | 146              | 32,8 | 63                      | 30,7 | 83                     | 34,6 |        |
| <b>Minimum 7-day PPA at 6 months (with the use of 12-month or 3-month smoking status if missing)</b>                                         |                  |      |                         |      |                        |      | 0,7817 |
| Smokers                                                                                                                                      | 481              | 68,7 | 223                     | 68,2 | 258                    | 69,2 |        |
| Quitters                                                                                                                                     | 219              | 31,3 | 104                     | 31,8 | 115                    | 30,8 |        |
| <b>Minimum 7-day PPA at 6 months considering non-respondents as smokers</b>                                                                  |                  |      |                         |      |                        |      | 0,0778 |
| Smokers                                                                                                                                      | 1627             | 91,8 | 826                     | 92,9 | 801                    | 90,6 |        |
| Quitters                                                                                                                                     | 146              | 8,2  | 63                      | 7,1  | 83                     | 9,4  |        |
| <b>Minimum 7-day PPA at 6 months (with the use of 12-month or 3-month smoking status if missing), considering non-respondents as smokers</b> |                  |      |                         |      |                        |      | 0,4017 |
| Smokers                                                                                                                                      | 1554             | 87,6 | 785                     | 88,3 | 769                    | 87,0 |        |
| Quitters                                                                                                                                     | 219              | 12,4 | 104                     | 11,7 | 115                    | 13,0 |        |

\* Chi-square test

Supplementary Table 4e. PP analyses / sex

| <b>Men</b>                                                                                                                                   |                  |      |                         |      |                        |      |        |
|----------------------------------------------------------------------------------------------------------------------------------------------|------------------|------|-------------------------|------|------------------------|------|--------|
|                                                                                                                                              | Total<br>N= 704  |      | Yes<br>N=278<br>(39,5%) |      | No<br>N=426<br>(60,5%) |      | p*     |
|                                                                                                                                              | N                | %    | N                       | %    | N                      | %    |        |
| <b>Minimum 7-day PPA at 6 months</b>                                                                                                         |                  |      |                         |      |                        |      | 0,2367 |
| Smokers                                                                                                                                      | 115              | 59,6 | 39                      | 54,2 | 76                     | 62,8 |        |
| Quitters                                                                                                                                     | 78               | 40,4 | 33                      | 45,8 | 45                     | 37,2 |        |
| <b>Minimum 7-day PPA at 6 months (with the use of 12-month or 3-month smoking status if missing)</b>                                         |                  |      |                         |      |                        |      | 0,3214 |
| Smokers                                                                                                                                      | 178              | 63,6 | 61                      | 59,8 | 117                    | 65,7 |        |
| Quitters                                                                                                                                     | 102              | 36,4 | 41                      | 40,2 | 61                     | 34,3 |        |
| <b>Minimum 7-day PPA at 6 months considering non-respondents as smokers</b>                                                                  |                  |      |                         |      |                        |      | 0,5891 |
| Smokers                                                                                                                                      | 626              | 88,9 | 245                     | 88,1 | 381                    | 89,4 |        |
| Quitters                                                                                                                                     | 78               | 11,1 | 33                      | 11,9 | 45                     | 10,6 |        |
| <b>Minimum 7-day PPA at 6 months (with the use of 12-month or 3-month smoking status if missing), considering non-respondents as smokers</b> |                  |      |                         |      |                        |      | 0,8744 |
| Smokers                                                                                                                                      | 602              | 85,5 | 237                     | 85,3 | 365                    | 85,7 |        |
| Quitters                                                                                                                                     | 102              | 14,5 | 41                      | 14,7 | 61                     | 14,3 |        |
| <b>Women</b>                                                                                                                                 |                  |      |                         |      |                        |      |        |
|                                                                                                                                              | Total<br>N= 1210 |      | Yes<br>N=509<br>(42,1%) |      | No<br>N=701<br>(57,9%) |      | p*     |
|                                                                                                                                              | N                | %    | N                       | %    | N                      | %    |        |
| <b>Minimum 7-day PPA at 6 months</b>                                                                                                         |                  |      |                         |      |                        |      | 0,7543 |
| Smokers                                                                                                                                      | 219              | 69,1 | 89                      | 70,1 | 130                    | 68,4 |        |
| Quitters                                                                                                                                     | 98               | 30,9 | 38                      | 29,9 | 60                     | 31,6 |        |
| <b>Minimum 7-day PPA at 6 months (with the use of 12-month or 3-month smoking status if missing)</b>                                         |                  |      |                         |      |                        |      | 0,3842 |
| Smokers                                                                                                                                      | 335              | 69,9 | 130                     | 67,7 | 205                    | 71,4 |        |
| Quitters                                                                                                                                     | 144              | 30,1 | 62                      | 32,3 | 82                     | 28,6 |        |
| <b>Minimum 7-day PPA at 6 months considering non-respondents as smokers</b>                                                                  |                  |      |                         |      |                        |      | 0,4912 |
| Smokers                                                                                                                                      | 1112             | 91,9 | 471                     | 92,5 | 641                    | 91,4 |        |
| Quitters                                                                                                                                     | 98               | 8,1  | 38                      | 7,5  | 60                     | 8,6  |        |
| <b>Minimum 7-day PPA at 6 months (with the use of 12-month or 3-month smoking status if missing), considering non-respondents as smokers</b> |                  |      |                         |      |                        |      | 0,7978 |
| Smokers                                                                                                                                      | 1066             | 88,1 | 447                     | 87,8 | 619                    | 88,3 |        |
| Quitters                                                                                                                                     | 144              | 11,9 | 62                      | 12,2 | 82                     | 11,7 |        |

\* Chi-square test

**Supplementary Table 4f. As Treated analyses / sex**

| <b>Men</b>                                                                                                                                   |                  |      |                         |      |                         |      |        |
|----------------------------------------------------------------------------------------------------------------------------------------------|------------------|------|-------------------------|------|-------------------------|------|--------|
|                                                                                                                                              | Total<br>N= 1033 |      | Yes<br>N=374<br>(36,2%) |      | No<br>N=659<br>(63,8%)  |      | p*     |
|                                                                                                                                              | N                | %    | N                       | %    | N                       | %    |        |
| <b>Minimum 7-day PPA at 6 months</b>                                                                                                         |                  |      |                         |      |                         |      | 0,4560 |
| Smokers                                                                                                                                      | 178              | 61,8 | 65                      | 59,1 | 113                     | 63,5 |        |
| Quitters                                                                                                                                     | 110              | 38,2 | 45                      | 40,9 | 65                      | 36,5 |        |
| <b>Minimum 7-day PPA at 6 months (with the use of 12-month or 3-month smoking status if missing)</b>                                         |                  |      |                         |      |                         |      | 0,5641 |
| Smokers                                                                                                                                      | 271              | 64,5 | 96                      | 62,7 | 175                     | 65,5 |        |
| Quitters                                                                                                                                     | 149              | 35,5 | 57                      | 37,3 | 92                      | 34,5 |        |
| <b>Minimum 7-day PPA at 6 months considering non-respondents as smokers</b>                                                                  |                  |      |                         |      |                         |      | 0,2775 |
| Smokers                                                                                                                                      | 923              | 89,4 | 329                     | 88,0 | 594                     | 90,1 |        |
| Quitters                                                                                                                                     | 110              | 10,6 | 45                      | 12,0 | 65                      | 9,9  |        |
| <b>Minimum 7-day PPA at 6 months (with the use of 12-month or 3-month smoking status if missing), considering non-respondents as smokers</b> |                  |      |                         |      |                         |      | 0,5736 |
| Smokers                                                                                                                                      | 884              | 85,6 | 317                     | 84,8 | 567                     | 86,0 |        |
| Quitters                                                                                                                                     | 149              | 14,4 | 57                      | 15,2 | 92                      | 14,0 |        |
| <b>Women</b>                                                                                                                                 |                  |      |                         |      |                         |      |        |
|                                                                                                                                              | Total<br>N= 1773 |      | Yes<br>N=692<br>(39,0%) |      | No<br>N=1081<br>(61,0%) |      | p*     |
|                                                                                                                                              | N                | %    | N                       | %    | N                       | %    |        |
| <b>Minimum 7-day PPA at 6 months</b>                                                                                                         |                  |      |                         |      |                         |      | 0,5458 |
| Smokers                                                                                                                                      | 299              | 67,2 | 116                     | 65,5 | 183                     | 68,3 |        |
| Quitters                                                                                                                                     | 146              | 32,8 | 61                      | 34,5 | 85                      | 31,7 |        |
| <b>Minimum 7-day PPA at 6 months (with the use of 12-month or 3-month smoking status if missing)</b>                                         |                  |      |                         |      |                         |      | 0,1812 |
| Smokers                                                                                                                                      | 481              | 68,7 | 183                     | 65,8 | 298                     | 70,6 |        |
| Quitters                                                                                                                                     | 219              | 31,3 | 95                      | 34,2 | 124                     | 29,4 |        |
| <b>Minimum 7-day PPA at 6 months considering non-respondents as smokers</b>                                                                  |                  |      |                         |      |                         |      | 0,4769 |
| Smokers                                                                                                                                      | 1627             | 91,8 | 631                     | 91,2 | 996                     | 92,1 |        |
| Quitters                                                                                                                                     | 146              | 8,2  | 61                      | 8,8  | 85                      | 7,9  |        |
| <b>Minimum 7-day PPA at 6 months (with the use of 12-month or 3-month smoking status if missing), considering non-respondents as smokers</b> |                  |      |                         |      |                         |      | 0,1588 |
| Smokers                                                                                                                                      | 1554             | 87,6 | 597                     | 86,3 | 957                     | 88,5 |        |
| Quitters                                                                                                                                     | 219              | 12,4 | 95                      | 13,7 | 124                     | 11,5 |        |

\* Chi-square test



**Supplementary Table 4g. ITT analyses / Family or adoption planning**

| <b>Yes</b>                                                                                                                                   |                  |      |                          |      |                         |      |        |
|----------------------------------------------------------------------------------------------------------------------------------------------|------------------|------|--------------------------|------|-------------------------|------|--------|
|                                                                                                                                              | Total<br>N= 338  |      | Yes<br>N=156<br>(46,2%)  |      | No<br>N=182<br>(53,8%)  |      | p*     |
|                                                                                                                                              | N                | %    | N                        | %    | N                       | %    |        |
| <b>Minimum 7-day PPA at 6 months</b>                                                                                                         |                  |      |                          |      |                         |      | 0,8599 |
| Smokers                                                                                                                                      | 47               | 54,7 | 22                       | 53,7 | 25                      | 55,6 |        |
| Quitters                                                                                                                                     | 39               | 45,3 | 19                       | 46,3 | 20                      | 44,4 |        |
| <b>Minimum 7-day PPA at 6 months (with the use of 12-month or 3-month smoking status if missing)</b>                                         |                  |      |                          |      |                         |      | 0,8020 |
| Smokers                                                                                                                                      | 75               | 59,5 | 37                       | 60,7 | 38                      | 58,5 |        |
| Quitters                                                                                                                                     | 51               | 40,5 | 24                       | 39,3 | 27                      | 41,5 |        |
| <b>Minimum 7-day PPA at 6 months considering non-respondents as smokers</b>                                                                  |                  |      |                          |      |                         |      | 0,7327 |
| Smokers                                                                                                                                      | 299              | 88,5 | 137                      | 87,8 | 162                     | 89,0 |        |
| Quitters                                                                                                                                     | 39               | 11,5 | 19                       | 12,2 | 20                      | 11,0 |        |
| <b>Minimum 7-day PPA at 6 months (with the use of 12-month or 3-month smoking status if missing), considering non-respondents as smokers</b> |                  |      |                          |      |                         |      | 0,8881 |
| Smokers                                                                                                                                      | 287              | 84,9 | 132                      | 84,6 | 155                     | 85,2 |        |
| Quitters                                                                                                                                     | 51               | 15,1 | 24                       | 15,4 | 27                      | 14,8 |        |
| <b>No</b>                                                                                                                                    |                  |      |                          |      |                         |      |        |
|                                                                                                                                              | Total<br>N= 2433 |      | Yes<br>N=1223<br>(50,3%) |      | No<br>N=1210<br>(49,7%) |      | p*     |
|                                                                                                                                              | N                | %    | N                        | %    | N                       | %    |        |
| <b>Minimum 7-day PPA at 6 months</b>                                                                                                         |                  |      |                          |      |                         |      | 0,8751 |
| Smokers                                                                                                                                      | 428              | 66,5 | 195                      | 66,8 | 233                     | 66,2 |        |
| Quitters                                                                                                                                     | 216              | 33,5 | 97                       | 33,2 | 119                     | 33,8 |        |
| <b>Minimum 7-day PPA at 6 months (with the use of 12-month or 3-month smoking status if missing)</b>                                         |                  |      |                          |      |                         |      | 0,3630 |
| Smokers                                                                                                                                      | 671              | 68,1 | 303                      | 66,6 | 368                     | 69,3 |        |
| Quitters                                                                                                                                     | 315              | 31,9 | 152                      | 33,4 | 163                     | 30,7 |        |
| <b>Minimum 7-day PPA at 6 months considering non-respondents as smokers</b>                                                                  |                  |      |                          |      |                         |      | 0,0989 |
| Smokers                                                                                                                                      | 2217             | 91,1 | 1126                     | 92,1 | 1091                    | 90,2 |        |
| Quitters                                                                                                                                     | 216              | 8,9  | 97                       | 7,9  | 119                     | 9,8  |        |
| <b>Minimum 7-day PPA at 6 months (with the use of 12-month or 3-month smoking status if missing), considering non-respondents as smokers</b> |                  |      |                          |      |                         |      | 0,4437 |
| Smokers                                                                                                                                      | 2118             | 87,1 | 1071                     | 87,6 | 1047                    | 86,5 |        |
| Quitters                                                                                                                                     | 315              | 12,9 | 152                      | 12,4 | 163                     | 13,5 |        |

\* Chi-square test

**Supplementary Table 4h. PP analyses / Family or adoption planning**

| <b>Yes</b>                                                                                                                                   |                  |      |                         |      |                        |      |        |
|----------------------------------------------------------------------------------------------------------------------------------------------|------------------|------|-------------------------|------|------------------------|------|--------|
|                                                                                                                                              | Total<br>N= 252  |      | Yes<br>N=102<br>(40,5%) |      | No<br>N=150<br>(59,5%) |      | p*     |
|                                                                                                                                              | N                | %    | N                       | %    | N                      | %    |        |
| <b>Minimum 7-day PPA at 6 months</b>                                                                                                         |                  |      |                         |      |                        |      | 0,9073 |
| Smokers                                                                                                                                      | 40               | 58,8 | 18                      | 58,1 | 22                     | 59,5 |        |
| Quitters                                                                                                                                     | 28               | 41,2 | 13                      | 41,9 | 15                     | 40,5 |        |
| <b>Minimum 7-day PPA at 6 months (with the use of 12-month or 3-month smoking status if missing)</b>                                         |                  |      |                         |      |                        |      | 0,9883 |
| Smokers                                                                                                                                      | 57               | 63,3 | 26                      | 63,4 | 31                     | 63,3 |        |
| Quitters                                                                                                                                     | 33               | 36,7 | 15                      | 36,6 | 18                     | 36,7 |        |
| <b>Minimum 7-day PPA at 6 months considering non-respondents as smokers</b>                                                                  |                  |      |                         |      |                        |      | 0,4961 |
| Smokers                                                                                                                                      | 224              | 88,9 | 89                      | 87,3 | 135                    | 90,0 |        |
| Quitters                                                                                                                                     | 28               | 11,1 | 13                      | 12,7 | 15                     | 10,0 |        |
| <b>Minimum 7-day PPA at 6 months (with the use of 12-month or 3-month smoking status if missing), considering non-respondents as smokers</b> |                  |      |                         |      |                        |      | 0,5320 |
| Smokers                                                                                                                                      | 219              | 86,9 | 87                      | 85,3 | 132                    | 88,0 |        |
| Quitters                                                                                                                                     | 33               | 13,1 | 15                      | 14,7 | 18                     | 12,0 |        |
| <b>No</b>                                                                                                                                    |                  |      |                         |      |                        |      |        |
|                                                                                                                                              | Total<br>N= 1643 |      | Yes<br>N=677<br>(41,2%) |      | No<br>N=966<br>(58,8%) |      | p*     |
|                                                                                                                                              | N                | %    | N                       | %    | N                      | %    |        |
| <b>Minimum 7-day PPA at 6 months</b>                                                                                                         |                  |      |                         |      |                        |      | 0,7169 |
| Smokers                                                                                                                                      | 294              | 66,5 | 110                     | 65,5 | 184                    | 67,2 |        |
| Quitters                                                                                                                                     | 148              | 33,5 | 58                      | 34,5 | 90                     | 32,8 |        |
| <b>Minimum 7-day PPA at 6 months (with the use of 12-month or 3-month smoking status if missing)</b>                                         |                  |      |                         |      |                        |      | 0,2081 |
| Smokers                                                                                                                                      | 453              | 68,1 | 165                     | 65,2 | 288                    | 69,9 |        |
| Quitters                                                                                                                                     | 212              | 31,9 | 88                      | 34,8 | 124                    | 30,1 |        |
| <b>Minimum 7-day PPA at 6 months considering non-respondents as smokers</b>                                                                  |                  |      |                         |      |                        |      | 0,6014 |
| Smokers                                                                                                                                      | 1495             | 91,0 | 619                     | 91,4 | 876                    | 90,7 |        |
| Quitters                                                                                                                                     | 148              | 9,0  | 58                      | 8,6  | 90                     | 9,3  |        |
| <b>Minimum 7-day PPA at 6 months (with the use of 12-month or 3-month smoking status if missing), considering non-respondents as smokers</b> |                  |      |                         |      |                        |      | 0,9232 |
| Smokers                                                                                                                                      | 1431             | 87,1 | 589                     | 87,0 | 842                    | 87,2 |        |
| Quitters                                                                                                                                     | 212              | 12,9 | 88                      | 13,0 | 124                    | 12,8 |        |

\* Chi-square test

**Supplementary Table 4i. As Treated analyses / Family or adoption planning**

| <b>Yes</b>                                                                                                                                   |                  |      |                         |      |                         |      |        |
|----------------------------------------------------------------------------------------------------------------------------------------------|------------------|------|-------------------------|------|-------------------------|------|--------|
|                                                                                                                                              | Total<br>N= 338  |      | Yes<br>N=134<br>(39,6%) |      | No<br>N=204<br>(60,4%)  |      | p*     |
|                                                                                                                                              | N                | %    | N                       | %    | N                       | %    |        |
| <b>Minimum 7-day PPA at 6 months</b>                                                                                                         |                  |      |                         |      |                         |      | 0,8913 |
| Smokers                                                                                                                                      | 47               | 54,7 | 21                      | 53,8 | 26                      | 55,3 |        |
| Quitters                                                                                                                                     | 39               | 45,3 | 18                      | 46,2 | 21                      | 44,7 |        |
| <b>Minimum 7-day PPA at 6 months (with the use of 12-month or 3-month smoking status if missing)</b>                                         |                  |      |                         |      |                         |      | 0,7349 |
| Smokers                                                                                                                                      | 75               | 59,5 | 33                      | 57,9 | 42                      | 60,9 |        |
| Quitters                                                                                                                                     | 51               | 40,5 | 24                      | 42,1 | 27                      | 39,1 |        |
| <b>Minimum 7-day PPA at 6 months considering non-respondents as smokers</b>                                                                  |                  |      |                         |      |                         |      | 0,3770 |
| Smokers                                                                                                                                      | 299              | 88,5 | 116                     | 86,6 | 183                     | 89,7 |        |
| Quitters                                                                                                                                     | 39               | 11,5 | 18                      | 13,4 | 21                      | 10,3 |        |
| <b>Minimum 7-day PPA at 6 months (with the use of 12-month or 3-month smoking status if missing), considering non-respondents as smokers</b> |                  |      |                         |      |                         |      | 0,2401 |
| Smokers                                                                                                                                      | 287              | 84,9 | 110                     | 82,1 | 177                     | 86,8 |        |
| Quitters                                                                                                                                     | 51               | 15,1 | 24                      | 17,9 | 27                      | 13,2 |        |
| <b>No</b>                                                                                                                                    |                  |      |                         |      |                         |      |        |
|                                                                                                                                              | Total<br>N= 2433 |      | Yes<br>N=921<br>(37,9%) |      | No<br>N=1512<br>(62,1%) |      | p*     |
|                                                                                                                                              | N                | %    | N                       | %    | N                       | %    |        |
| <b>Minimum 7-day PPA at 6 months</b>                                                                                                         |                  |      |                         |      |                         |      | 0,4405 |
| Smokers                                                                                                                                      | 428              | 66,5 | 159                     | 64,6 | 269                     | 67,6 |        |
| Quitters                                                                                                                                     | 216              | 33,5 | 87                      | 35,4 | 129                     | 32,4 |        |
| <b>Minimum 7-day PPA at 6 months (with the use of 12-month or 3-month smoking status if missing)</b>                                         |                  |      |                         |      |                         |      | 0,2504 |
| Smokers                                                                                                                                      | 671              | 68,1 | 245                     | 65,9 | 426                     | 69,4 |        |
| Quitters                                                                                                                                     | 315              | 31,9 | 127                     | 34,1 | 188                     | 30,6 |        |
| <b>Minimum 7-day PPA at 6 months considering non-respondents as smokers</b>                                                                  |                  |      |                         |      |                         |      | 0,4418 |
| Smokers                                                                                                                                      | 2217             | 91,1 | 834                     | 90,6 | 1383                    | 91,5 |        |
| Quitters                                                                                                                                     | 216              | 8,9  | 87                      | 9,4  | 129                     | 8,5  |        |
| <b>Minimum 7-day PPA at 6 months (with the use of 12-month or 3-month smoking status if missing), considering non-respondents as smokers</b> |                  |      |                         |      |                         |      | 0,3341 |
| Smokers                                                                                                                                      | 2118             | 87,1 | 794                     | 86,2 | 1324                    | 87,6 |        |
| Quitters                                                                                                                                     | 315              | 12,9 | 127                     | 13,8 | 188                     | 12,4 |        |

\* Chi-square test

Supplementary Table 4j. ITT analyses / Tobacco status at inclusion

| <b>Smokers</b>                                                                                                                               |                  |      |                         |      |                        |      |        |
|----------------------------------------------------------------------------------------------------------------------------------------------|------------------|------|-------------------------|------|------------------------|------|--------|
|                                                                                                                                              | Total<br>N= 1881 |      | Yes<br>N=931<br>(49,5%) |      | No<br>N=950<br>(50,5%) |      | p*     |
|                                                                                                                                              | N                | %    | N                       | %    | N                      | %    |        |
| <b>Minimum 7-day PPA at 6 months</b>                                                                                                         |                  |      |                         |      |                        |      | 0,9587 |
| Smokers                                                                                                                                      | 337              | 72,6 | 153                     | 72,5 | 184                    | 72,7 |        |
| Quitters                                                                                                                                     | 127              | 27,4 | 58                      | 27,5 | 69                     | 27,3 |        |
| <b>Minimum 7-day PPA at 6 months (with the use of 12-month or 3-month smoking status if missing)</b>                                         |                  |      |                         |      |                        |      | 0,3667 |
| Smokers                                                                                                                                      | 538              | 75,7 | 237                     | 74,1 | 301                    | 77,0 |        |
| Quitters                                                                                                                                     | 173              | 24,3 | 83                      | 25,9 | 90                     | 23,0 |        |
| <b>Minimum 7-day PPA at 6 months considering non-respondents as smokers</b>                                                                  |                  |      |                         |      |                        |      | 0,3719 |
| Smokers                                                                                                                                      | 1754             | 93,2 | 873                     | 93,8 | 881                    | 92,7 |        |
| Quitters                                                                                                                                     | 127              | 6,8  | 58                      | 6,2  | 69                     | 7,3  |        |
| <b>Minimum 7-day PPA at 6 months (with the use of 12-month or 3-month smoking status if missing), considering non-respondents as smokers</b> |                  |      |                         |      |                        |      | 0,6751 |
| Smokers                                                                                                                                      | 1708             | 90,8 | 848                     | 91,1 | 860                    | 90,5 |        |
| Quitters                                                                                                                                     | 173              | 9,2  | 83                      | 8,9  | 90                     | 9,5  |        |
| <b>Quitters</b>                                                                                                                              |                  |      |                         |      |                        |      |        |
|                                                                                                                                              | Total<br>N= 925  |      | Yes<br>N=469<br>(50,7%) |      | No<br>N=456<br>(49,3%) |      | p*     |
|                                                                                                                                              | N                | %    | N                       | %    | N                      | %    |        |
| <b>Minimum 7-day PPA at 6 months</b>                                                                                                         |                  |      |                         |      |                        |      | 0,8093 |
| Smokers                                                                                                                                      | 140              | 52,0 | 65                      | 52,8 | 75                     | 51,4 |        |
| Quitters                                                                                                                                     | 129              | 48,0 | 58                      | 47,2 | 71                     | 48,6 |        |
| <b>Minimum 7-day PPA at 6 months (with the use of 12-month or 3-month smoking status if missing)</b>                                         |                  |      |                         |      |                        |      | 0,7814 |
| Smokers                                                                                                                                      | 214              | 52,3 | 105                     | 53,0 | 109                    | 51,7 |        |
| Quitters                                                                                                                                     | 195              | 47,7 | 93                      | 47,0 | 102                    | 48,3 |        |
| <b>Minimum 7-day PPA at 6 months considering non-respondents as smokers</b>                                                                  |                  |      |                         |      |                        |      | 0,1597 |
| Smokers                                                                                                                                      | 796              | 86,1 | 411                     | 87,6 | 385                    | 84,4 |        |
| Quitters                                                                                                                                     | 129              | 13,9 | 58                      | 12,4 | 71                     | 15,6 |        |
| <b>Minimum 7-day PPA at 6 months (with the use of 12-month or 3-month smoking status if missing), considering non-respondents as smokers</b> |                  |      |                         |      |                        |      | 0,3439 |
| Smokers                                                                                                                                      | 730              | 78,9 | 376                     | 80,2 | 354                    | 77,6 |        |
| Quitters                                                                                                                                     | 195              | 21,1 | 93                      | 19,8 | 102                    | 22,4 |        |

\* Chi-square test

**Supplementary Table 4k. PP analyses / Tobacco status at inclusion**

| <b>Smokers</b>                                                                                                                               |                  |      |                         |      |                        |      |        |
|----------------------------------------------------------------------------------------------------------------------------------------------|------------------|------|-------------------------|------|------------------------|------|--------|
|                                                                                                                                              | Total<br>N= 1287 |      | Yes<br>N=526<br>(40,9%) |      | No<br>N=761<br>(59,1%) |      | p*     |
|                                                                                                                                              | N                | %    | N                       | %    | N                      | %    |        |
| <b>Minimum 7-day PPA at 6 months</b>                                                                                                         |                  |      |                         |      |                        |      | 0,1905 |
| Smokers                                                                                                                                      | 238              | 72,3 | 91                      | 68,4 | 147                    | 75,0 |        |
| Quitters                                                                                                                                     | 91               | 27,7 | 42                      | 31,6 | 49                     | 25,0 |        |
| <b>Minimum 7-day PPA at 6 months (with the use of 12-month or 3-month smoking status if missing)</b>                                         |                  |      |                         |      |                        |      | 0,0476 |
| Smokers                                                                                                                                      | 371              | 75,3 | 133                     | 70,4 | 238                    | 78,3 |        |
| Quitters                                                                                                                                     | 122              | 24,7 | 56                      | 29,6 | 66                     | 21,7 |        |
| <b>Minimum 7-day PPA at 6 months considering non-respondents as smokers</b>                                                                  |                  |      |                         |      |                        |      | 0,2875 |
| Smokers                                                                                                                                      | 1196             | 92,9 | 484                     | 92,0 | 712                    | 93,6 |        |
| Quitters                                                                                                                                     | 91               | 7,1  | 42                      | 8,0  | 49                     | 6,4  |        |
| <b>Minimum 7-day PPA at 6 months (with the use of 12-month or 3-month smoking status if missing), considering non-respondents as smokers</b> |                  |      |                         |      |                        |      | 0,2348 |
| Smokers                                                                                                                                      | 1165             | 90,5 | 470                     | 89,4 | 695                    | 91,3 |        |
| Quitters                                                                                                                                     | 122              | 9,5  | 56                      | 10,6 | 66                     | 8,7  |        |
| <b>Quitters</b>                                                                                                                              |                  |      |                         |      |                        |      |        |
|                                                                                                                                              | Total<br>N= 627  |      | Yes<br>N=261<br>(41,6%) |      | No<br>N=366<br>(58,4%) |      | p*     |
|                                                                                                                                              | N                | %    | N                       | %    | N                      | %    |        |
| <b>Minimum 7-day PPA at 6 months</b>                                                                                                         |                  |      |                         |      |                        |      | 0,5371 |
| Smokers                                                                                                                                      | 96               | 53,0 | 37                      | 56,1 | 59                     | 51,3 |        |
| Quitters                                                                                                                                     | 85               | 47,0 | 29                      | 43,9 | 56                     | 48,7 |        |
| <b>Minimum 7-day PPA at 6 months (with the use of 12-month or 3-month smoking status if missing)</b>                                         |                  |      |                         |      |                        |      | 0,6244 |
| Smokers                                                                                                                                      | 142              | 53,4 | 58                      | 55,2 | 84                     | 52,2 |        |
| Quitters                                                                                                                                     | 124              | 46,6 | 47                      | 44,8 | 77                     | 47,8 |        |
| <b>Minimum 7-day PPA at 6 months considering non-respondents as smokers</b>                                                                  |                  |      |                         |      |                        |      | 0,1309 |
| Smokers                                                                                                                                      | 542              | 86,4 | 232                     | 88,9 | 310                    | 84,7 |        |
| Quitters                                                                                                                                     | 85               | 13,6 | 29                      | 11,1 | 56                     | 15,3 |        |
| <b>Minimum 7-day PPA at 6 months (with the use of 12-month or 3-month smoking status if missing), considering non-respondents as smokers</b> |                  |      |                         |      |                        |      | 0,3477 |
| Smokers                                                                                                                                      | 503              | 80,2 | 214                     | 82,0 | 289                    | 79,0 |        |
| Quitters                                                                                                                                     | 124              | 19,8 | 47                      | 18,0 | 77                     | 21,0 |        |

\* Chi-square test

**Supplementary Table 4I. As Treated analyses / Tobacco status at inclusion**

| <b>Smokers</b>                                                                                                                               |                  |      |                         |      |                         |      |               |
|----------------------------------------------------------------------------------------------------------------------------------------------|------------------|------|-------------------------|------|-------------------------|------|---------------|
|                                                                                                                                              | Total<br>N= 1881 |      | Yes<br>N=715<br>(38,0%) |      | No<br>N=1166<br>(62,0%) |      | p*            |
|                                                                                                                                              | N                | %    | N                       | %    | N                       | %    |               |
| <b>Minimum 7-day PPA at 6 months</b>                                                                                                         |                  |      |                         |      |                         |      | <b>0,0343</b> |
| Smokers                                                                                                                                      | 337              | 72,6 | 128                     | 67,4 | 209                     | 76,3 |               |
| Quitters                                                                                                                                     | 127              | 27,4 | 62                      | 32,6 | 65                      | 23,7 |               |
| <b>Minimum 7-day PPA at 6 months (with the use of 12-month or 3-month smoking status if missing)</b>                                         |                  |      |                         |      |                         |      | <b>0,0213</b> |
| Smokers                                                                                                                                      | 538              | 75,7 | 196                     | 71,0 | 342                     | 78,6 |               |
| Quitters                                                                                                                                     | 173              | 24,3 | 80                      | 29,0 | 93                      | 21,4 |               |
| <b>Minimum 7-day PPA at 6 months considering non-respondents as smokers</b>                                                                  |                  |      |                         |      |                         |      | <b>0,0094</b> |
| Smokers                                                                                                                                      | 1754             | 93,2 | 653                     | 91,3 | 1101                    | 94,4 |               |
| Quitters                                                                                                                                     | 127              | 6,8  | 62                      | 8,7  | 65                      | 5,6  |               |
| <b>Minimum 7-day PPA at 6 months (with the use of 12-month or 3-month smoking status if missing), considering non-respondents as smokers</b> |                  |      |                         |      |                         |      | <b>0,0193</b> |
| Smokers                                                                                                                                      | 1708             | 90,8 | 635                     | 88,8 | 1073                    | 92,0 |               |
| Quitters                                                                                                                                     | 173              | 9,2  | 80                      | 11,2 | 93                      | 8,0  |               |
| <b>Quitters</b>                                                                                                                              |                  |      |                         |      |                         |      |               |
|                                                                                                                                              | Total<br>N= 925  |      | Yes<br>N=351<br>(37,9%) |      | No<br>N=574<br>(62,1%)  |      | p*            |
|                                                                                                                                              | N                | %    | N                       | %    | N                       | %    |               |
| <b>Minimum 7-day PPA at 6 months</b>                                                                                                         |                  |      |                         |      |                         |      | 0,5224        |
| Smokers                                                                                                                                      | 140              | 52,0 | 53                      | 54,6 | 87                      | 50,6 |               |
| Quitters                                                                                                                                     | 129              | 48,0 | 44                      | 45,4 | 85                      | 49,4 |               |
| <b>Minimum 7-day PPA at 6 months (with the use of 12-month or 3-month smoking status if missing)</b>                                         |                  |      |                         |      |                         |      | 0,6983        |
| Smokers                                                                                                                                      | 214              | 52,3 | 83                      | 53,5 | 131                     | 51,6 |               |
| Quitters                                                                                                                                     | 195              | 47,7 | 72                      | 46,5 | 123                     | 48,4 |               |
| <b>Minimum 7-day PPA at 6 months considering non-respondents as smokers</b>                                                                  |                  |      |                         |      |                         |      | 0,3329        |
| Smokers                                                                                                                                      | 796              | 86,1 | 307                     | 87,5 | 489                     | 85,2 |               |
| Quitters                                                                                                                                     | 129              | 13,9 | 44                      | 12,5 | 85                      | 14,8 |               |
| <b>Minimum 7-day PPA at 6 months (with the use of 12-month or 3-month smoking status if missing), considering non-respondents as smokers</b> |                  |      |                         |      |                         |      | 0,7404        |
| Smokers                                                                                                                                      | 730              | 78,9 | 279                     | 79,5 | 451                     | 78,6 |               |
| Quitters                                                                                                                                     | 195              | 21,1 | 72                      | 20,5 | 123                     | 21,4 |               |

\* Chi-square test

**Supplementary Table 4m. ITT analyses / Year of inclusion**

| <b>2017</b>                                                                                                                                  |                  |      |                         |      |                        |      |        |
|----------------------------------------------------------------------------------------------------------------------------------------------|------------------|------|-------------------------|------|------------------------|------|--------|
|                                                                                                                                              | Total<br>N= 875  |      | Yes<br>N=450<br>(51,4%) |      | No<br>N=425<br>(48,6%) |      | p*     |
|                                                                                                                                              | N                | %    | N                       | %    | N                      | %    |        |
| <b>Minimum 7-day PPA at 6 months</b>                                                                                                         |                  |      |                         |      |                        |      | 0,6335 |
| Smokers                                                                                                                                      | 136              | 60,4 | 64                      | 62,1 | 72                     | 59,0 |        |
| Quitters                                                                                                                                     | 89               | 39,6 | 39                      | 37,9 | 50                     | 41,0 |        |
| <b>Minimum 7-day PPA at 6 months (with the use of 12-month or 3-month smoking status if missing)</b>                                         |                  |      |                         |      |                        |      | 0,3127 |
| Smokers                                                                                                                                      | 241              | 65,8 | 110                     | 63,2 | 131                    | 68,2 |        |
| Quitters                                                                                                                                     | 125              | 34,2 | 64                      | 36,8 | 61                     | 31,8 |        |
| <b>Minimum 7-day PPA at 6 months considering non-respondents as smokers</b>                                                                  |                  |      |                         |      |                        |      | 0,1297 |
| Smokers                                                                                                                                      | 786              | 89,8 | 411                     | 91,3 | 375                    | 88,2 |        |
| Quitters                                                                                                                                     | 89               | 10,2 | 39                      | 8,7  | 50                     | 11,8 |        |
| <b>Minimum 7-day PPA at 6 months (with the use of 12-month or 3-month smoking status if missing), considering non-respondents as smokers</b> |                  |      |                         |      |                        |      | 0,9560 |
| Smokers                                                                                                                                      | 750              | 85,7 | 386                     | 85,8 | 364                    | 85,6 |        |
| Quitters                                                                                                                                     | 125              | 14,3 | 64                      | 14,2 | 61                     | 14,4 |        |
| <b>2018</b>                                                                                                                                  |                  |      |                         |      |                        |      |        |
|                                                                                                                                              | Total<br>N= 1931 |      | Yes<br>N=950<br>(49,2%) |      | No<br>N=981<br>(50,8%) |      | p*     |
|                                                                                                                                              | N                | %    | N                       | %    | N                      | %    |        |
| <b>Minimum 7-day PPA at 6 months</b>                                                                                                         |                  |      |                         |      |                        |      | 0,8405 |
| Smokers                                                                                                                                      | 341              | 67,1 | 154                     | 66,7 | 187                    | 67,5 |        |
| Quitters                                                                                                                                     | 167              | 32,9 | 77                      | 33,3 | 90                     | 32,5 |        |
| <b>Minimum 7-day PPA at 6 months (with the use of 12-month or 3-month smoking status if missing)</b>                                         |                  |      |                         |      |                        |      | 0,8590 |
| Smokers                                                                                                                                      | 511              | 67,8 | 232                     | 67,4 | 279                    | 68,0 |        |
| Quitters                                                                                                                                     | 243              | 32,2 | 112                     | 32,6 | 131                    | 32,0 |        |
| <b>Minimum 7-day PPA at 6 months considering non-respondents as smokers</b>                                                                  |                  |      |                         |      |                        |      | 0,4034 |
| Smokers                                                                                                                                      | 1764             | 91,4 | 873                     | 91,9 | 891                    | 90,8 |        |
| Quitters                                                                                                                                     | 167              | 8,6  | 77                      | 8,1  | 90                     | 9,2  |        |
| <b>Minimum 7-day PPA at 6 months (with the use of 12-month or 3-month smoking status if missing), considering non-respondents as smokers</b> |                  |      |                         |      |                        |      | 0,3002 |
| Smokers                                                                                                                                      | 1688             | 87,4 | 838                     | 88,2 | 850                    | 86,6 |        |
| Quitters                                                                                                                                     | 243              | 12,6 | 112                     | 11,8 | 131                    | 13,4 |        |

\* Chi-square test

**Supplementary Table 4n. PP analyses / Year of inclusion**

| <b>2017</b>                                                                                                                                  |                  |      |                         |      |                        |      |        |
|----------------------------------------------------------------------------------------------------------------------------------------------|------------------|------|-------------------------|------|------------------------|------|--------|
|                                                                                                                                              | Total<br>N= 574  |      | Yes<br>N=279<br>(48,6%) |      | No<br>N=295<br>(51,4%) |      | p*     |
|                                                                                                                                              | N                | %    | N                       | %    | N                      | %    |        |
| <b>Minimum 7-day PPA at 6 months</b>                                                                                                         |                  |      |                         |      |                        |      | 0,7410 |
| Smokers                                                                                                                                      | 91               | 60,3 | 43                      | 58,9 | 48                     | 61,5 |        |
| Quitters                                                                                                                                     | 60               | 39,7 | 30                      | 41,1 | 30                     | 38,5 |        |
| <b>Minimum 7-day PPA at 6 months (with the use of 12-month or 3-month smoking status if missing)</b>                                         |                  |      |                         |      |                        |      | 0,1185 |
| Smokers                                                                                                                                      | 158              | 66,1 | 69                      | 61,1 | 89                     | 70,6 |        |
| Quitters                                                                                                                                     | 81               | 33,9 | 44                      | 38,9 | 37                     | 29,4 |        |
| <b>Minimum 7-day PPA at 6 months considering non-respondents as smokers</b>                                                                  |                  |      |                         |      |                        |      | 0,8194 |
| Smokers                                                                                                                                      | 514              | 89,5 | 249                     | 89,2 | 265                    | 89,8 |        |
| Quitters                                                                                                                                     | 60               | 10,5 | 30                      | 10,8 | 30                     | 10,2 |        |
| <b>Minimum 7-day PPA at 6 months (with the use of 12-month or 3-month smoking status if missing), considering non-respondents as smokers</b> |                  |      |                         |      |                        |      | 0,2668 |
| Smokers                                                                                                                                      | 493              | 85,9 | 235                     | 84,2 | 258                    | 87,5 |        |
| Quitters                                                                                                                                     | 81               | 14,1 | 44                      | 15,8 | 37                     | 12,5 |        |
| <b>2018</b>                                                                                                                                  |                  |      |                         |      |                        |      |        |
|                                                                                                                                              | Total<br>N= 1340 |      | Yes<br>N=508<br>(37,9%) |      | No<br>N=832<br>(62,1%) |      | p*     |
|                                                                                                                                              | N                | %    | N                       | %    | N                      | %    |        |
| <b>Minimum 7-day PPA at 6 months</b>                                                                                                         |                  |      |                         |      |                        |      | 0,9459 |
| Smokers                                                                                                                                      | 243              | 67,7 | 85                      | 67,5 | 158                    | 67,8 |        |
| Quitters                                                                                                                                     | 116              | 32,3 | 41                      | 32,5 | 75                     | 32,2 |        |
| <b>Minimum 7-day PPA at 6 months (with the use of 12-month or 3-month smoking status if missing)</b>                                         |                  |      |                         |      |                        |      | 0,7566 |
| Smokers                                                                                                                                      | 355              | 68,3 | 122                     | 67,4 | 233                    | 68,7 |        |
| Quitters                                                                                                                                     | 165              | 31,7 | 59                      | 32,6 | 106                    | 31,3 |        |
| <b>Minimum 7-day PPA at 6 months considering non-respondents as smokers</b>                                                                  |                  |      |                         |      |                        |      | 0,5512 |
| Smokers                                                                                                                                      | 1224             | 91,3 | 467                     | 91,9 | 757                    | 91,0 |        |
| Quitters                                                                                                                                     | 116              | 8,7  | 41                      | 8,1  | 75                     | 9,0  |        |
| <b>Minimum 7-day PPA at 6 months (with the use of 12-month or 3-month smoking status if missing), considering non-respondents as smokers</b> |                  |      |                         |      |                        |      | 0,5427 |
| Smokers                                                                                                                                      | 1175             | 87,7 | 449                     | 88,4 | 726                    | 87,3 |        |
| Quitters                                                                                                                                     | 165              | 12,3 | 59                      | 11,6 | 106                    | 12,7 |        |

\* Chi-square test



**Supplementary Table 4o. As Treated analyses / Year of inclusion**

| <b>2017</b>                                                                                                                                  |                  |      |                         |      |                         |      |        |
|----------------------------------------------------------------------------------------------------------------------------------------------|------------------|------|-------------------------|------|-------------------------|------|--------|
|                                                                                                                                              | Total<br>N= 875  |      | Yes<br>N=409<br>(46,7%) |      | No<br>N=466<br>(53,3%)  |      | p*     |
|                                                                                                                                              | N                | %    | N                       | %    | N                       | %    |        |
| <b>Minimum 7-day PPA at 6 months</b>                                                                                                         |                  |      |                         |      |                         |      | 0,3100 |
| Smokers                                                                                                                                      | 136              | 60,4 | 67                      | 57,3 | 69                      | 63,9 |        |
| Quitters                                                                                                                                     | 89               | 39,6 | 50                      | 42,7 | 39                      | 36,1 |        |
| <b>Minimum 7-day PPA at 6 months (with the use of 12-month or 3-month smoking status if missing)</b>                                         |                  |      |                         |      |                         |      | 0,1300 |
| Smokers                                                                                                                                      | 241              | 65,8 | 111                     | 62,0 | 130                     | 69,5 |        |
| Quitters                                                                                                                                     | 125              | 34,2 | 68                      | 38,0 | 57                      | 30,5 |        |
| <b>Minimum 7-day PPA at 6 months considering non-respondents as smokers</b>                                                                  |                  |      |                         |      |                         |      | 0,0597 |
| Smokers                                                                                                                                      | 786              | 89,8 | 359                     | 87,8 | 427                     | 91,6 |        |
| Quitters                                                                                                                                     | 89               | 10,2 | 50                      | 12,2 | 39                      | 8,4  |        |
| <b>Minimum 7-day PPA at 6 months (with the use of 12-month or 3-month smoking status if missing), considering non-respondents as smokers</b> |                  |      |                         |      |                         |      | 0,0638 |
| Smokers                                                                                                                                      | 750              | 85,7 | 341                     | 83,4 | 409                     | 87,8 |        |
| Quitters                                                                                                                                     | 125              | 14,3 | 68                      | 16,6 | 57                      | 12,2 |        |
| <b>2018</b>                                                                                                                                  |                  |      |                         |      |                         |      |        |
|                                                                                                                                              | Total<br>N= 1931 |      | Yes<br>N=657<br>(34,0%) |      | No<br>N=1274<br>(66,0%) |      | p*     |
|                                                                                                                                              | N                | %    | N                       | %    | N                       | %    |        |
| <b>Minimum 7-day PPA at 6 months</b>                                                                                                         |                  |      |                         |      |                         |      | 0,9818 |
| Smokers                                                                                                                                      | 341              | 67,1 | 114                     | 67,1 | 227                     | 67,2 |        |
| Quitters                                                                                                                                     | 167              | 32,9 | 56                      | 32,9 | 111                     | 32,8 |        |
| <b>Minimum 7-day PPA at 6 months (with the use of 12-month or 3-month smoking status if missing)</b>                                         |                  |      |                         |      |                         |      | 0,6455 |
| Smokers                                                                                                                                      | 511              | 67,8 | 168                     | 66,7 | 343                     | 68,3 |        |
| Quitters                                                                                                                                     | 243              | 32,2 | 84                      | 33,3 | 159                     | 31,7 |        |
| <b>Minimum 7-day PPA at 6 months considering non-respondents as smokers</b>                                                                  |                  |      |                         |      |                         |      | 0,8886 |
| Smokers                                                                                                                                      | 1764             | 91,4 | 601                     | 91,5 | 1163                    | 91,3 |        |
| Quitters                                                                                                                                     | 167              | 8,6  | 56                      | 8,5  | 111                     | 8,7  |        |
| <b>Minimum 7-day PPA at 6 months (with the use of 12-month or 3-month smoking status if missing), considering non-respondents as smokers</b> |                  |      |                         |      |                         |      | 0,8482 |
| Smokers                                                                                                                                      | 1688             | 87,4 | 573                     | 87,2 | 1115                    | 87,5 |        |
| Quitters                                                                                                                                     | 243              | 12,6 | 84                      | 12,8 | 159                     | 12,5 |        |

\* Chi-square test

**Supplementary Table 4p. ITT analyses / level of education**

| <b>&lt; Bac</b>                                                                                                                              |                  |      |                          |      |                         |      |        |  |
|----------------------------------------------------------------------------------------------------------------------------------------------|------------------|------|--------------------------|------|-------------------------|------|--------|--|
|                                                                                                                                              | Total<br>N= 700  |      | Yes<br>N=355<br>(50,7%)  |      | No<br>N=345<br>(49,3%)  |      | p*     |  |
|                                                                                                                                              | N                | %    | N                        | %    | N                       | %    |        |  |
| <b>Minimum 7-day PPA at 6 months</b>                                                                                                         |                  |      |                          |      |                         |      | 0,7256 |  |
| Smokers                                                                                                                                      | 103              | 69,6 | 49                       | 71,0 | 54                      | 68,4 |        |  |
| Quitters                                                                                                                                     | 45               | 30,4 | 20                       | 29,0 | 25                      | 31,6 |        |  |
| <b>Minimum 7-day PPA at 6 months (with the use of 12-month or 3-month smoking status if missing)</b>                                         |                  |      |                          |      |                         |      | 0,9826 |  |
| Smokers                                                                                                                                      | 162              | 69,2 | 79                       | 69,3 | 83                      | 69,2 |        |  |
| Quitters                                                                                                                                     | 72               | 30,8 | 35                       | 30,7 | 37                      | 30,8 |        |  |
| <b>Minimum 7-day PPA at 6 months considering non-respondents as smokers</b>                                                                  |                  |      |                          |      |                         |      | 0,3845 |  |
| Smokers                                                                                                                                      | 655              | 93,6 | 335                      | 94,4 | 320                     | 92,8 |        |  |
| Quitters                                                                                                                                     | 45               | 6,4  | 20                       | 5,6  | 25                      | 7,2  |        |  |
| <b>Minimum 7-day PPA at 6 months (with the use of 12-month or 3-month smoking status if missing), considering non-respondents as smokers</b> |                  |      |                          |      |                         |      | 0,7063 |  |
| Smokers                                                                                                                                      | 628              | 89,7 | 320                      | 90,1 | 308                     | 89,3 |        |  |
| Quitters                                                                                                                                     | 72               | 10,3 | 35                       | 9,9  | 37                      | 10,7 |        |  |
| <b>Bac and over</b>                                                                                                                          |                  |      |                          |      |                         |      |        |  |
|                                                                                                                                              | Total<br>N= 2086 |      | Yes<br>N=1033<br>(49,5%) |      | No<br>N=1053<br>(50,5%) |      | p*     |  |
|                                                                                                                                              | N                | %    | N                        | %    | N                       | %    |        |  |
| <b>Minimum 7-day PPA at 6 months</b>                                                                                                         |                  |      |                          |      |                         |      | 0,9990 |  |
| Smokers                                                                                                                                      | 374              | 64,3 | 169                      | 64,3 | 205                     | 64,3 |        |  |
| Quitters                                                                                                                                     | 208              | 35,7 | 94                       | 35,7 | 114                     | 35,7 |        |  |
| <b>Minimum 7-day PPA at 6 months (with the use of 12-month or 3-month smoking status if missing)</b>                                         |                  |      |                          |      |                         |      | 0,3931 |  |
| Smokers                                                                                                                                      | 588              | 66,8 | 262                      | 65,3 | 326                     | 68,1 |        |  |
| Quitters                                                                                                                                     | 292              | 33,2 | 139                      | 34,7 | 153                     | 31,9 |        |  |
| <b>Minimum 7-day PPA at 6 months considering non-respondents as smokers</b>                                                                  |                  |      |                          |      |                         |      | 0,1882 |  |
| Smokers                                                                                                                                      | 1878             | 90,0 | 939                      | 90,9 | 939                     | 89,2 |        |  |
| Quitters                                                                                                                                     | 208              | 10,0 | 94                       | 9,1  | 114                     | 10,8 |        |  |
| <b>Minimum 7-day PPA at 6 months (with the use of 12-month or 3-month smoking status if missing), considering non-respondents as smokers</b> |                  |      |                          |      |                         |      | 0,4797 |  |
| Smokers                                                                                                                                      | 1794             | 86,0 | 894                      | 86,5 | 900                     | 85,5 |        |  |
| Quitters                                                                                                                                     | 292              | 14,0 | 139                      | 13,5 | 153                     | 14,5 |        |  |

\* Chi-square test

**Supplementary Table 4q. PP analyses / level of education**

| <b>&lt; bac</b>                                                                                                                              |                  |      |                         |      |                        |      |        |
|----------------------------------------------------------------------------------------------------------------------------------------------|------------------|------|-------------------------|------|------------------------|------|--------|
|                                                                                                                                              | Total<br>N= 463  |      | Yes<br>N=177<br>(38,2%) |      | No<br>N=286<br>(61,8%) |      | p*     |
|                                                                                                                                              | N                | %    | N                       | %    | N                      | %    |        |
| <b>Minimum 7-day PPA at 6 months</b>                                                                                                         |                  |      |                         |      |                        |      | 0,8258 |
| Smokers                                                                                                                                      | 66               | 69,5 | 22                      | 71,0 | 44                     | 68,8 |        |
| Quitters                                                                                                                                     | 29               | 30,5 | 9                       | 29,0 | 20                     | 31,3 |        |
| <b>Minimum 7-day PPA at 6 months (with the use of 12-month or 3-month smoking status if missing)</b>                                         |                  |      |                         |      |                        |      | 0,7238 |
| Smokers                                                                                                                                      | 104              | 70,3 | 37                      | 68,5 | 67                     | 71,3 |        |
| Quitters                                                                                                                                     | 44               | 29,7 | 17                      | 31,5 | 27                     | 28,7 |        |
| <b>Minimum 7-day PPA at 6 months considering non-respondents as smokers</b>                                                                  |                  |      |                         |      |                        |      | 0,4102 |
| Smokers                                                                                                                                      | 434              | 93,7 | 168                     | 94,9 | 266                    | 93,0 |        |
| Quitters                                                                                                                                     | 29               | 6,3  | 9                       | 5,1  | 20                     | 7,0  |        |
| <b>Minimum 7-day PPA at 6 months (with the use of 12-month or 3-month smoking status if missing), considering non-respondents as smokers</b> |                  |      |                         |      |                        |      | 0,9534 |
| Smokers                                                                                                                                      | 419              | 90,5 | 160                     | 90,4 | 259                    | 90,6 |        |
| Quitters                                                                                                                                     | 44               | 9,5  | 17                      | 9,6  | 27                     | 9,4  |        |
| <b>Bac and over</b>                                                                                                                          |                  |      |                         |      |                        |      |        |
|                                                                                                                                              | Total<br>N= 1436 |      | Yes<br>N=601<br>(41,9%) |      | No<br>N=835<br>(58,1%) |      | p*     |
|                                                                                                                                              | N                | %    | N                       | %    | N                      | %    |        |
| <b>Minimum 7-day PPA at 6 months</b>                                                                                                         |                  |      |                         |      |                        |      | 0,6588 |
| Smokers                                                                                                                                      | 268              | 64,7 | 106                     | 63,5 | 162                    | 65,6 |        |
| Quitters                                                                                                                                     | 146              | 35,3 | 61                      | 36,5 | 85                     | 34,4 |        |
| <b>Minimum 7-day PPA at 6 months (with the use of 12-month or 3-month smoking status if missing)</b>                                         |                  |      |                         |      |                        |      | 0,2444 |
| Smokers                                                                                                                                      | 407              | 67,1 | 153                     | 64,3 | 254                    | 68,8 |        |
| Quitters                                                                                                                                     | 200              | 32,9 | 85                      | 35,7 | 115                    | 31,2 |        |
| <b>Minimum 7-day PPA at 6 months considering non-respondents as smokers</b>                                                                  |                  |      |                         |      |                        |      | 0,9852 |
| Smokers                                                                                                                                      | 1290             | 89,8 | 540                     | 89,9 | 750                    | 89,8 |        |
| Quitters                                                                                                                                     | 146              | 10,2 | 61                      | 10,1 | 85                     | 10,2 |        |
| <b>Minimum 7-day PPA at 6 months (with the use of 12-month or 3-month smoking status if missing), considering non-respondents as smokers</b> |                  |      |                         |      |                        |      | 0,8414 |
| Smokers                                                                                                                                      | 1236             | 86,1 | 516                     | 85,9 | 720                    | 86,2 |        |
| Quitters                                                                                                                                     | 200              | 13,9 | 85                      | 14,1 | 115                    | 13,8 |        |

\* Chi-square test

**Supplementary Table 4r. As Treated analyses / level of education**

| <b>&lt; Bac</b>                                                                                                                              |                  |      |                         |      |                         |      |        |
|----------------------------------------------------------------------------------------------------------------------------------------------|------------------|------|-------------------------|------|-------------------------|------|--------|
|                                                                                                                                              | Total<br>N= 700  |      | Yes<br>N=236<br>(33,7%) |      | No<br>N=464<br>(66,3%)  |      | p*     |
|                                                                                                                                              | N                | %    | N                       | %    | N                       | %    |        |
| <b>Minimum 7-day PPA at 6 months</b>                                                                                                         |                  |      |                         |      |                         |      | 0,9958 |
| Smokers                                                                                                                                      | 103              | 69,6 | 32                      | 69,6 | 71                      | 69,6 |        |
| Quitters                                                                                                                                     | 45               | 30,4 | 14                      | 30,4 | 31                      | 30,4 |        |
| <b>Minimum 7-day PPA at 6 months (with the use of 12-month or 3-month smoking status if missing)</b>                                         |                  |      |                         |      |                         |      | 0,4764 |
| Smokers                                                                                                                                      | 162              | 69,2 | 53                      | 66,3 | 109                     | 70,8 |        |
| Quitters                                                                                                                                     | 72               | 30,8 | 27                      | 33,8 | 45                      | 29,2 |        |
| <b>Minimum 7-day PPA at 6 months considering non-respondents as smokers</b>                                                                  |                  |      |                         |      |                         |      | 0,7026 |
| Smokers                                                                                                                                      | 655              | 93,6 | 222                     | 94,1 | 433                     | 93,3 |        |
| Quitters                                                                                                                                     | 45               | 6,4  | 14                      | 5,9  | 31                      | 6,7  |        |
| <b>Minimum 7-day PPA at 6 months (with the use of 12-month or 3-month smoking status if missing), considering non-respondents as smokers</b> |                  |      |                         |      |                         |      | 0,4731 |
| Smokers                                                                                                                                      | 628              | 89,7 | 209                     | 88,6 | 419                     | 90,3 |        |
| Quitters                                                                                                                                     | 72               | 10,3 | 27                      | 11,4 | 45                      | 9,7  |        |
| <b>Bac and over</b>                                                                                                                          |                  |      |                         |      |                         |      |        |
|                                                                                                                                              | Total<br>N= 2086 |      | Yes<br>N=819<br>(39,3%) |      | No<br>N=1267<br>(60,7%) |      | p*     |
|                                                                                                                                              | N                | %    | N                       | %    | N                       | %    |        |
| <b>Minimum 7-day PPA at 6 months</b>                                                                                                         |                  |      |                         |      |                         |      | 0,4202 |
| Smokers                                                                                                                                      | 374              | 64,3 | 149                     | 62,3 | 225                     | 65,6 |        |
| Quitters                                                                                                                                     | 208              | 35,7 | 90                      | 37,7 | 118                     | 34,4 |        |
| <b>Minimum 7-day PPA at 6 months (with the use of 12-month or 3-month smoking status if missing)</b>                                         |                  |      |                         |      |                         |      | 0,2704 |
| Smokers                                                                                                                                      | 588              | 66,8 | 225                     | 64,7 | 363                     | 68,2 |        |
| Quitters                                                                                                                                     | 292              | 33,2 | 123                     | 35,3 | 169                     | 31,8 |        |
| <b>Minimum 7-day PPA at 6 months considering non-respondents as smokers</b>                                                                  |                  |      |                         |      |                         |      | 0,2123 |
| Smokers                                                                                                                                      | 1878             | 90,0 | 729                     | 89,0 | 1149                    | 90,7 |        |
| Quitters                                                                                                                                     | 208              | 10,0 | 90                      | 11,0 | 118                     | 9,3  |        |
| <b>Minimum 7-day PPA at 6 months (with the use of 12-month or 3-month smoking status if missing), considering non-respondents as smokers</b> |                  |      |                         |      |                         |      | 0,2803 |
| Smokers                                                                                                                                      | 1794             | 86,0 | 696                     | 85,0 | 1098                    | 86,7 |        |
| Quitters                                                                                                                                     | 292              | 14,0 | 123                     | 15,0 | 169                     | 13,3 |        |

\* Chi-square test



## CONSORT 2010 checklist of information to include when reporting a randomised trial\*

| Section/Topic                    | Item No | Checklist item                                                                                                                                                                              | Reported on page No |
|----------------------------------|---------|---------------------------------------------------------------------------------------------------------------------------------------------------------------------------------------------|---------------------|
| <b>Title and abstract</b>        |         |                                                                                                                                                                                             |                     |
|                                  | 1a      | Identification as a randomised trial in the title                                                                                                                                           | 1                   |
|                                  | 1b      | Structured summary of trial design, methods, results, and conclusions (for specific guidance see CONSORT for abstracts)                                                                     | 1                   |
| <b>Introduction</b>              |         |                                                                                                                                                                                             |                     |
| Background and objectives        | 2a      | Scientific background and explanation of rationale                                                                                                                                          | 2                   |
|                                  | 2b      | Specific objectives or hypotheses                                                                                                                                                           | 4                   |
| <b>Methods</b>                   |         |                                                                                                                                                                                             |                     |
| Trial design                     | 3a      | Description of trial design (such as parallel, factorial) including allocation ratio                                                                                                        | 5                   |
|                                  | 3b      | Important changes to methods after trial commencement (such as eligibility criteria), with reasons                                                                                          | NA                  |
| Participants                     | 4a      | Eligibility criteria for participants                                                                                                                                                       | 6                   |
|                                  | 4b      | Settings and locations where the data were collected                                                                                                                                        | 5                   |
| Interventions                    | 5       | The interventions for each group with sufficient details to allow replication, including how and when they were actually administered                                                       | 6                   |
| Outcomes                         | 6a      | Completely defined pre-specified primary and secondary outcome measures, including how and when they were assessed                                                                          | 8                   |
|                                  | 6b      | Any changes to trial outcomes after the trial commenced, with reasons                                                                                                                       | 8                   |
| Sample size                      | 7a      | How sample size was determined                                                                                                                                                              | 9                   |
|                                  | 7b      | When applicable, explanation of any interim analyses and stopping guidelines                                                                                                                | NA                  |
| Randomisation:                   |         |                                                                                                                                                                                             | 5                   |
| Sequence generation              | 8a      | Method used to generate the random allocation sequence                                                                                                                                      |                     |
|                                  | 8b      | Type of randomisation; details of any restriction (such as blocking and block size)                                                                                                         | 5                   |
| Allocation concealment mechanism | 9       | Mechanism used to implement the random allocation sequence (such as sequentially numbered containers), describing any steps taken to conceal the sequence until interventions were assigned | 5                   |
| Implementation                   | 10      | Who generated the random allocation sequence, who enrolled participants, and who assigned participants to interventions                                                                     | 5                   |
| Blinding                         | 11a     | If done, who was blinded after assignment to interventions (for example, participants, care providers, those assessing outcomes) and how                                                    | NA                  |
|                                  | 11b     | If relevant, description of the similarity of interventions                                                                                                                                 | NA                  |
| Statistical methods              | 12a     | Statistical methods used to compare groups for primary and secondary outcomes                                                                                                               | 9                   |
|                                  | 12b     | Methods for additional analyses, such as subgroup analyses and adjusted analyses                                                                                                            | 10                  |

|    |                          |     |                                                                                                                  |       |
|----|--------------------------|-----|------------------------------------------------------------------------------------------------------------------|-------|
| 1  | <b>Results</b>           |     |                                                                                                                  |       |
| 2  | Participant flow (a      | 13a | For each group, the numbers of participants who were randomly assigned, received intended treatment, and         | Fig 1 |
| 3  | diagram is strongly      |     | were analysed for the primary outcome                                                                            |       |
| 4  | recommended)             | 13b | For each group, losses and exclusions after randomisation, together with reasons                                 | Fig 1 |
| 5  | Recruitment              | 14a | Dates defining the periods of recruitment and follow-up                                                          | 5     |
| 6  |                          | 14b | Why the trial ended or was stopped                                                                               | NA    |
| 7  | Baseline data            | 15  | A table showing baseline demographic and clinical characteristics for each group                                 | Suppl |
| 8  | Numbers analysed         | 16  | For each group, number of participants (denominator) included in each analysis and whether the analysis was      | 27    |
| 9  |                          |     | by original assigned groups                                                                                      |       |
| 10 | Outcomes and             | 17a | For each primary and secondary outcome, results for each group, and the estimated effect size and its            | 12    |
| 11 | estimation               |     | precision (such as 95% confidence interval)                                                                      |       |
| 12 |                          | 17b | For binary outcomes, presentation of both absolute and relative effect sizes is recommended                      | 27    |
| 13 | Ancillary analyses       | 18  | Results of any other analyses performed, including subgroup analyses and adjusted analyses, distinguishing       | 14    |
| 14 |                          |     | pre-specified from exploratory                                                                                   |       |
| 15 | Harms                    | 19  | All important harms or unintended effects in each group (for specific guidance see CONSORT for harms)            | NA    |
| 16 |                          |     |                                                                                                                  |       |
| 17 | <b>Discussion</b>        |     |                                                                                                                  |       |
| 18 | Limitations              | 20  | Trial limitations, addressing sources of potential bias, imprecision, and, if relevant, multiplicity of analyses | 19    |
| 19 | Generalisability         | 21  | Generalisability (external validity, applicability) of the trial findings                                        | 21    |
| 20 | Interpretation           | 22  | Interpretation consistent with results, balancing benefits and harms, and considering other relevant evidence    | 15    |
| 21 |                          |     |                                                                                                                  | 2     |
| 22 | <b>Other information</b> |     |                                                                                                                  |       |
| 23 | Registration             | 23  | Registration number and name of trial registry                                                                   |       |
| 24 | Protocol                 | 24  | Where the full trial protocol can be accessed, if available                                                      | 5     |
| 25 | Funding                  | 25  | Sources of funding and other support (such as supply of drugs), role of funders                                  | 3     |
| 26 |                          |     |                                                                                                                  |       |

27 \*We strongly recommend reading this statement in conjunction with the CONSORT 2010 Explanation and Elaboration for important clarifications on all the items. If relevant, we also  
 28 recommend reading CONSORT extensions for cluster randomised trials, non-inferiority and equivalence trials, non-pharmacological treatments, herbal interventions, and pragmatic trials.  
 29 Additional extensions are forthcoming: for those and for up to date references relevant to this checklist, see [www.consort-statement.org](http://www.consort-statement.org).
