# Supplementary material for: Effectiveness of the e-Tabac Info Service application for smoking cessation: a pragmatic randomised controlled trial
Source: PubMed Central journal article supplement — BMJ Open. 2020 Oct 27;10(10):e039515. doi: 10.1136/bmjopen-2020-039515 (PMC7592285; doi:10.1136/bmjopen-2020-039515), 2020-10-27
Supplement: bmjopen-2020-039515supp001.pdf [file bmjopen-2020-039515supp001.pdf]

**Supplementary Figure 1:** Diagram flow of the study with no recovery data at T6.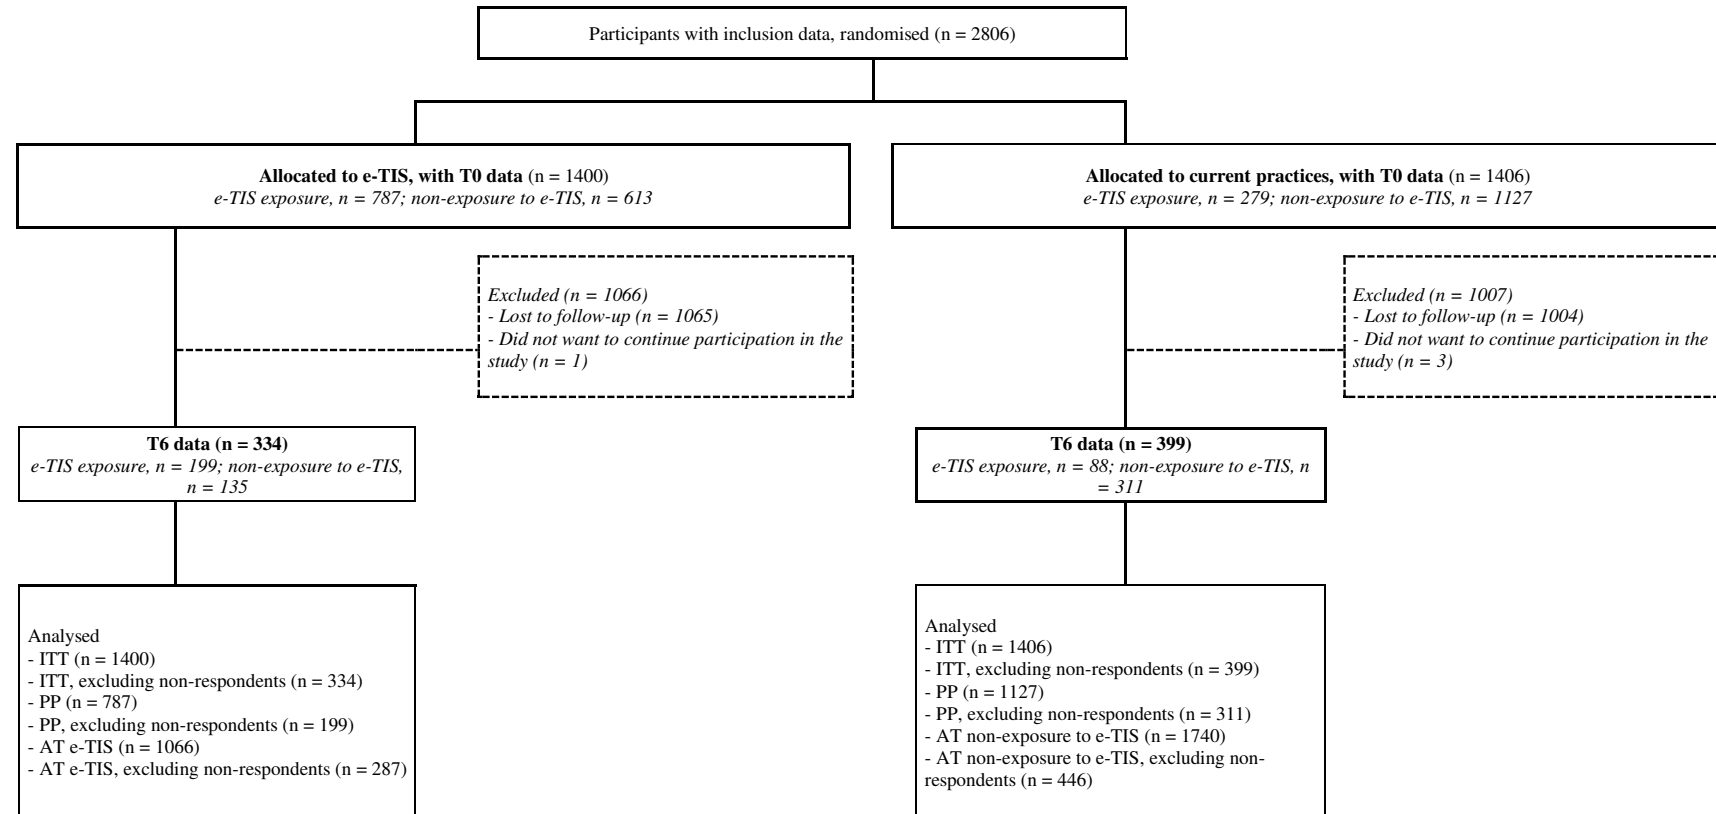

e-TIS, e-intervention Tabac Info Service; ITT, Intention to Treat; PP, Per Protocol; AT, As Treated

**Supplementary Figure 2:** Subgroup analysis in ITT population, considering non-respondents as smokers (n=2806)

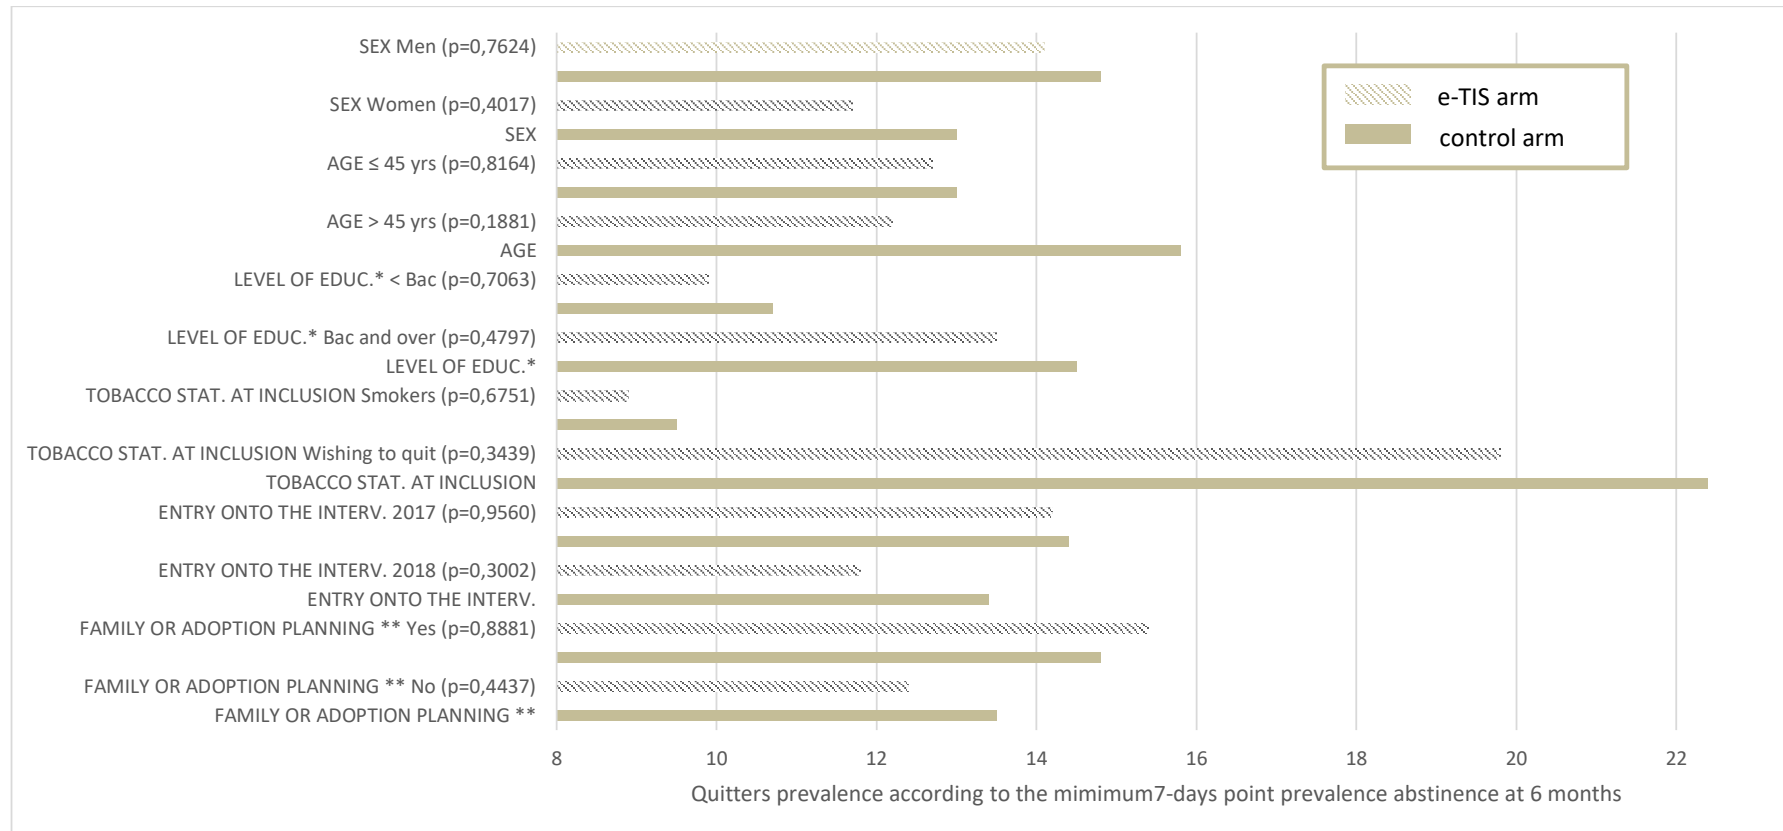

\* n=2786 due to missing data  
 \*\*n=2771 due to missing data  
 P-values are derived from Chi-2 tests

**Supplementary Table 1:** Baseline characteristics of the randomised patients and levels of exposure to the application during the study, according to intervention arm (n = 2806).

|                                                                                | Total<br>n = 2806 |      | e-TIS<br>n = 1400 (49.9%) |      | Control<br>n = 1406 (50.1%) |      | p-value* |
|--------------------------------------------------------------------------------|-------------------|------|---------------------------|------|-----------------------------|------|----------|
|                                                                                | n                 | %    | n                         | %    | n                           | %    |          |
| <b>BASELINE CHARACTERISTICS</b>                                                |                   |      |                           |      |                             |      |          |
| <b>Sex</b>                                                                     |                   |      |                           |      |                             |      | 0.7308   |
| Male                                                                           | 1033              | 36.8 | 511                       | 36.5 | 522                         | 37.1 |          |
| Female                                                                         | 1773              | 63.2 | 889                       | 63.5 | 884                         | 62.9 |          |
| <b>Age</b>                                                                     |                   |      |                           |      |                             |      | 0.9418   |
| ≤ 45 years                                                                     | 2163              | 77.1 | 1080                      | 77.1 | 1083                        | 77.0 |          |
| < 45 years                                                                     | 643               | 22.9 | 320                       | 22.9 | 323                         | 23.0 |          |
| <b>Smoking status at inclusion</b>                                             |                   |      |                           |      |                             |      | 0.5475   |
| Smokers                                                                        | 1881              | 67.0 | 931                       | 66.5 | 950                         | 67.6 |          |
| Wishing to quit                                                                | 925               | 33.0 | 469                       | 33.5 | 456                         | 32.4 |          |
| <b>Living situation</b>                                                        |                   |      |                           |      |                             |      | 0.9570   |
| Single                                                                         | 828               | 29.6 | 414                       | 29.7 | 414                         | 29.6 |          |
| With a partner                                                                 | 1661              | 59.4 | 829                       | 59.4 | 832                         | 59.4 |          |
| With parents                                                                   | 150               | 5.4  | 71                        | 5.1  | 79                          | 5.6  |          |
| With roommates                                                                 | 72                | 2.6  | 38                        | 2.7  | 34                          | 2.4  |          |
| Other                                                                          | 85                | 3.0  | 43                        | 3.1  | 42                          | 3.0  |          |
| Missing data                                                                   | 10                |      | 5                         |      | 5                           |      |          |
| <b>Living with minors</b>                                                      |                   |      |                           |      |                             |      | 0.5344   |
| Yes                                                                            | 1343              | 48.3 | 678                       | 48.8 | 665                         | 47.7 |          |
| No                                                                             | 1440              | 51.7 | 710                       | 51.2 | 730                         | 52.3 |          |
| Missing data                                                                   | 23                |      | 12                        |      | 11                          |      |          |
| <b>Current pregnancy in the couple</b>                                         |                   |      |                           |      |                             |      | 0.6772   |
| Yes                                                                            | 128               | 4.6  | 66                        | 4.8  | 62                          | 4.5  |          |
| No                                                                             | 2645              | 95.4 | 1314                      | 95.2 | 1331                        | 95.5 |          |
| Missing data                                                                   | 33                |      | 20                        |      | 13                          |      |          |
| <b>Pregnancy/adoption within 1 year</b>                                        |                   |      |                           |      |                             |      | 0.1564   |
| Yes                                                                            | 338               | 12.2 | 156                       | 11.3 | 182                         | 13.1 |          |
| No                                                                             | 2433              | 87.8 | 1223                      | 88.7 | 1210                        | 86.9 |          |
| Missing data                                                                   | 35                |      | 21                        |      | 14                          |      |          |
| <b>Level of education</b>                                                      |                   |      |                           |      |                             |      | 0.5847   |
| Less than baccalaureate degree                                                 | 700               | 25.1 | 355                       | 25.6 | 345                         | 24.7 |          |
| Baccalaureate degree or higher                                                 | 2086              | 74.9 | 1033                      | 74.4 | 1053                        | 75.3 |          |
| Missing data                                                                   | 20                |      | 12                        |      | 8                           |      |          |
| <b>Treatment for cardiovascular and/or respiratory diseases</b>                |                   |      |                           |      |                             |      | 0.0556   |
| Yes                                                                            | 426               | 15.5 | 231                       | 16.9 | 195                         | 14.2 |          |
| No                                                                             | 2316              | 84.5 | 1139                      | 83.1 | 1177                        | 85.8 |          |
| Missing data                                                                   | 64                |      | 30                        |      | 34                          |      |          |
| <b>EXPOSURE TO THE APPLICATION DURING THE STUDY</b>                            |                   |      |                           |      |                             |      |          |
| <b>e-TIS downloaded</b>                                                        |                   |      |                           |      |                             |      | < 0.0001 |
| Yes                                                                            | 1139              | 40.6 | 843                       | 60.2 | 296                         | 21.0 |          |
| No                                                                             | 1667              | 59.6 | 557                       | 39.8 | 1110                        | 79.0 |          |
| <b>e-TIS exposure (i.e., completed at least one activity or questionnaire)</b> |                   |      |                           |      |                             |      | < 0.0001 |
| Yes                                                                            | 1066              | 38.0 | 787                       | 56.2 | 279                         | 19.8 |          |
| No                                                                             | 1740              | 62.0 | 613                       | 43.8 | 1127                        | 80.2 |          |

\* Chi-squared test for qualitative variables  
e-TIS, e-intervention Tabac Info Service

**Supplementary Table 2:** Secondary outcomes in the ITT population, which only considered respondents.

|                                                                     | Total |        |      | e-TIS |        |       | Control |        |      | p-value* |
|---------------------------------------------------------------------|-------|--------|------|-------|--------|-------|---------|--------|------|----------|
|                                                                     | n     | %/mean | SD   | n     | %/mean | SD    | n       | %/mean | SD*  |          |
| <b>Continuous abstinence at 6 months (n = 733)</b>                  |       |        |      |       |        |       |         |        |      | 0.4536   |
| No                                                                  | 441   | 60.2   |      | 196   | 58.7   |       | 245     | 61.4   |      |          |
| Yes                                                                 | 292   | 39.8   |      | 138   | 41.3   |       | 154     | 38.6   |      |          |
| <b>Continuous abstinence at 12 months (n = 422)</b>                 |       |        |      |       |        |       |         |        |      | 0.1816   |
| No                                                                  | 198   | 46.9   |      | 87    | 43.5   |       | 111     | 50.0   |      |          |
| Yes                                                                 | 224   | 53.1   |      | 113   | 56.5   |       | 111     | 50.0   |      |          |
| <b>Minimum 24-hour point abstinence at 3 months (n = 644)</b>       |       |        |      |       |        |       |         |        |      | 0.1508   |
| No                                                                  | 420   | 65.2   |      | 174   | 62.1   |       | 246     | 67.6   |      |          |
| Yes                                                                 | 224   | 34.8   |      | 106   | 37.9   |       | 118     | 32.4   |      |          |
| <b>Minimum 30-day point abstinence at 12 months (n = 422)</b>       |       |        |      |       |        |       |         |        |      | 0.2914   |
| No                                                                  | 258   | 61.1   |      | 117   | 58.5   |       | 141     | 63.5   |      |          |
| Yes                                                                 | 164   | 38.9   |      | 83    | 41.5   |       | 81      | 36.5   |      |          |
| <b>Number of quit attempts at T3 (n = 644)</b><br>(n miss = 409)    | 235   | 1.7    | 5.7  | 112   | 1.7    | 6.1   | 123     | 1.6    | 5.4  | 0.9441   |
| <b>Duration of quit attempts at T3 (n = 644)</b><br>(n miss = 442)  | 202   | 58.5   | 45.8 | 95    | 54.8   | 44.8  | 107     | 61.8   | 46.6 | 0.2785   |
| <b>Number of quit attempts at T6 (n = 733)</b><br>(n miss = 447)    | 286   | 1.1    | 1.0  | 134   | 1.0    | 0.8   | 152     | 1.1    | 1.1  | 0.5654   |
| <b>Duration of quit attempts at T6 (n = 733)</b><br>(n miss = 516)  | 217   | 72.5   | 90.5 | 103   | 82.1   | 124.6 | 114     | 64.0   | 38.3 | 0.1414   |
| <b>Number of quit attempts at T12 (n = 422)</b><br>(n miss = 205)   | 217   | 1.7    | 6.6  | 112   | 1.0    | 1.2   | 105     | 2.4    | 9.4  | 0.1327   |
| <b>Duration of quit attempts at T12 (n = 422)</b><br>(n miss = 262) | 160   | 82.9   | 79.8 | 79    | 87.1   | 87.4  | 81      | 78.9   | 71.8 | 0.5205   |

\* Chi-squared test and Wilcoxon test

e-TIS, e-intervention Tabac Info Service; SD, standard deviation

**Supplementary Table 3:** Between-group differences in the primary outcome (minimum 7-day PPA at 6 months) in the ITT, PP and AT populations without considering recovery data at T6.

| ITT POPULATION                                              |                   |      |                              |      |                                             |      |        |
|-------------------------------------------------------------|-------------------|------|------------------------------|------|---------------------------------------------|------|--------|
|                                                             | Total<br>n = 2806 |      | e-TIS<br>n = 1400<br>(49.9%) |      | Control<br>n = 1406<br>(50.1%)              |      | p*     |
|                                                             | n                 | %    | n                            | %    | n                                           | %    |        |
| <b>Minimum 7-day PPA at 6 months (n = 733)<sup>1</sup></b>  |                   |      |                              |      |                                             |      | 0.9195 |
| Smokers                                                     | 477               | 65.1 | 218                          | 65.3 | 259                                         | 64.9 |        |
| Quitters                                                    | 256               | 34.9 | 116                          | 34.7 | 140                                         | 35.1 |        |
| <b>Minimum 7-day PPA at 6 months (n = 2806)<sup>2</sup></b> |                   |      |                              |      |                                             |      | 0.1241 |
| Smokers                                                     | 2550              | 90.9 | 1284                         | 91.7 | 1266                                        | 90.0 |        |
| Quitters                                                    | 256               | 9.1  | 116                          | 8.3  | 140                                         | 10.0 |        |
| PP POPULATION                                               |                   |      |                              |      |                                             |      |        |
|                                                             | Total<br>n = 1914 |      | e-TIS<br>n = 787<br>(41.1%)  |      | Control<br>n = 1127<br>(58.9%)              |      | p*     |
|                                                             | n                 | %    | n                            | %    | n                                           | %    |        |
| <b>Minimum 7-day PPA at 6 months (n = 510)<sup>1</sup></b>  |                   |      |                              |      |                                             |      | 0.6570 |
| Smokers                                                     | 334               | 65.5 | 128                          | 64.3 | 206                                         | 66.2 |        |
| Quitters                                                    | 176               | 34.5 | 71                           | 35.7 | 105                                         | 33.8 |        |
| <b>Minimum 7-day PPA at 6 months (n = 1914)<sup>2</sup></b> |                   |      |                              |      |                                             |      | 0.8260 |
| Smokers                                                     | 1738              | 90.8 | 716                          | 91.0 | 1022                                        | 90.7 |        |
| Quitters                                                    | 176               | 9.2  | 71                           | 9.0  | 105                                         | 9.3  |        |
| AT POPULATION                                               |                   |      |                              |      |                                             |      |        |
|                                                             | Total<br>n = 2806 |      | e-TIS<br>n = 1066<br>(38.0%) |      | Non-exposed to e-TIS<br>n = 1740<br>(62.0%) |      | p*     |
|                                                             | n                 | %    | n                            | %    | n                                           | %    |        |
| <b>Minimum 7-day PPA at 6 months (n = 733)<sup>1</sup></b>  |                   |      |                              |      |                                             |      | 0.3601 |
| Smokers                                                     | 477               | 65.1 | 181                          | 63.1 | 296                                         | 66.4 |        |
| Quitters                                                    | 256               | 34.9 | 106                          | 36.9 | 150                                         | 33.6 |        |
| <b>Minimum 7-day PPA at 6 months (n = 2806)<sup>2</sup></b> |                   |      |                              |      |                                             |      | 0.2375 |
| Smokers                                                     | 2550              | 90.9 | 960                          | 90.1 | 1590                                        | 91.4 |        |
| Quitters                                                    | 256               | 9.1  | 106                          | 9.9  | 150                                         | 8.6  |        |

<sup>1</sup> Only respondents considered<sup>2</sup> Non-respondents considered as smokers

\* Chi-squared test

e-TIS, e-intervention Tabac Info Service; PPA, point prevalence abstinence

Supplementary Table 4a. ITT analyses / age

| <b>Age ≤ 45 years</b>                                                                                                                        |                  |      |                          |      |                         |      |        |
|----------------------------------------------------------------------------------------------------------------------------------------------|------------------|------|--------------------------|------|-------------------------|------|--------|
|                                                                                                                                              | Total<br>N= 2163 |      | Yes<br>N=1080<br>(49,9%) |      | No<br>N=1083<br>(50,1%) |      | p*     |
|                                                                                                                                              | N                | %    | N                        | %    | N                       | %    |        |
| <b>Minimum 7-day PPA at 6 months</b>                                                                                                         |                  |      |                          |      |                         |      | 0,6422 |
| Smokers                                                                                                                                      | 349              | 64,6 | 159                      | 63,6 | 190                     | 65,5 |        |
| Quitters                                                                                                                                     | 191              | 35,4 | 91                       | 36,4 | 100                     | 34,5 |        |
| <b>Minimum 7-day PPA at 6 months (with the use of 12-month or 3-month smoking status if missing)</b>                                         |                  |      |                          |      |                         |      | 0,0988 |
| Smokers                                                                                                                                      | 555              | 66,6 | 240                      | 63,7 | 315                     | 69,1 |        |
| Quitters                                                                                                                                     | 278              | 33,4 | 137                      | 36,3 | 141                     | 30,9 |        |
| <b>Minimum 7-day PPA at 6 months considering non-respondents as smokers</b>                                                                  |                  |      |                          |      |                         |      | 0,5080 |
| Smokers                                                                                                                                      | 1972             | 91,2 | 989                      | 91,6 | 983                     | 90,8 |        |
| Quitters                                                                                                                                     | 191              | 8,8  | 91                       | 8,4  | 100                     | 9,2  |        |
| <b>Minimum 7-day PPA at 6 months (with the use of 12-month or 3-month smoking status if missing), considering non-respondents as smokers</b> |                  |      |                          |      |                         |      | 0,8164 |
| Smokers                                                                                                                                      | 1885             | 87,1 | 943                      | 87,3 | 942                     | 87,0 |        |
| Quitters                                                                                                                                     | 278              | 12,9 | 137                      | 12,7 | 141                     | 13,0 |        |
| <b>Age &gt; 45 years</b>                                                                                                                     |                  |      |                          |      |                         |      |        |
|                                                                                                                                              | Total<br>N= 643  |      | Yes<br>N=320<br>(49,8%)  |      | No<br>N=323<br>(50,2%)  |      | p*     |
|                                                                                                                                              | N                | %    | N                        | %    | N                       | %    |        |
| <b>Minimum 7-day PPA at 6 months</b>                                                                                                         |                  |      |                          |      |                         |      | 0,3121 |
| Smokers                                                                                                                                      | 128              | 66,3 | 59                       | 70,2 | 69                      | 63,3 |        |
| Quitters                                                                                                                                     | 65               | 33,7 | 25                       | 29,8 | 40                      | 36,7 |        |
| <b>Minimum 7-day PPA at 6 months (with the use of 12-month or 3-month smoking status if missing)</b>                                         |                  |      |                          |      |                         |      | 0,1844 |
| Smokers                                                                                                                                      | 197              | 68,6 | 102                      | 72,3 | 95                      | 65,1 |        |
| Quitters                                                                                                                                     | 90               | 31,4 | 39                       | 27,7 | 51                      | 34,9 |        |
| <b>Minimum 7-day PPA at 6 months considering non-respondents as smokers</b>                                                                  |                  |      |                          |      |                         |      | 0,0545 |
| Smokers                                                                                                                                      | 578              | 89,9 | 295                      | 92,2 | 283                     | 87,6 |        |
| Quitters                                                                                                                                     | 65               | 10,1 | 25                       | 7,8  | 40                      | 12,4 |        |
| <b>Minimum 7-day PPA at 6 months (with the use of 12-month or 3-month smoking status if missing), considering non-respondents as smokers</b> |                  |      |                          |      |                         |      | 0,1881 |
| Smokers                                                                                                                                      | 553              | 86,0 | 281                      | 87,8 | 272                     | 84,2 |        |
| Quitters                                                                                                                                     | 90               | 14,0 | 39                       | 12,2 | 51                      | 15,8 |        |

\* Chi-square test

Supplementary Table 4b. PP analyses / Age

| <b>Age ≤ 45 years</b>                                                                                                                        |                  |      |                         |      |                        |      |        |
|----------------------------------------------------------------------------------------------------------------------------------------------|------------------|------|-------------------------|------|------------------------|------|--------|
|                                                                                                                                              | Total<br>N= 1502 |      | Yes<br>N=639<br>(42,5%) |      | No<br>N=863<br>(57,5%) |      | p*     |
|                                                                                                                                              | N                | %    | N                       | %    | N                      | %    |        |
| <b>Minimum 7-day PPA at 6 months</b>                                                                                                         |                  |      |                         |      |                        |      |        |
| Smokers                                                                                                                                      | 254              | 65,5 | 102                     | 63,8 | 152                    | 66,7 | 0,5520 |
| Quitters                                                                                                                                     | 134              | 34,5 | 58                      | 36,3 | 76                     | 33,3 |        |
| <b>Minimum 7-day PPA at 6 months (with the use of 12-month or 3-month smoking status if missing)</b>                                         |                  |      |                         |      |                        |      |        |
| Smokers                                                                                                                                      | 391              | 67,3 | 144                     | 62,9 | 247                    | 70,2 | 0,0673 |
| Quitters                                                                                                                                     | 190              | 32,7 | 85                      | 37,1 | 105                    | 29,8 |        |
| <b>Minimum 7-day PPA at 6 months considering non-respondents as smokers</b>                                                                  |                  |      |                         |      |                        |      |        |
| Smokers                                                                                                                                      | 1368             | 91,1 | 581                     | 90,9 | 787                    | 91,2 | 0,8559 |
| Quitters                                                                                                                                     | 134              | 8,9  | 58                      | 9,1  | 76                     | 8,8  |        |
| <b>Minimum 7-day PPA at 6 months (with the use of 12-month or 3-month smoking status if missing), considering non-respondents as smokers</b> |                  |      |                         |      |                        |      |        |
| Smokers                                                                                                                                      | 1312             | 87,4 | 554                     | 86,7 | 758                    | 87,8 | 0,5129 |
| Quitters                                                                                                                                     | 190              | 12,6 | 85                      | 13,3 | 105                    | 12,2 |        |
| <b>Age &gt; 45 years</b>                                                                                                                     |                  |      |                         |      |                        |      |        |
|                                                                                                                                              | Total<br>N= 412  |      | Yes<br>N=148<br>(35,9%) |      | No<br>N=264<br>(64,1%) |      | p*     |
|                                                                                                                                              | N                | %    | N                       | %    | N                      | %    |        |
| <b>Minimum 7-day PPA at 6 months</b>                                                                                                         |                  |      |                         |      |                        |      |        |
| Smokers                                                                                                                                      | 80               | 65,6 | 26                      | 66,7 | 54                     | 65,1 | 0,8617 |
| Quitters                                                                                                                                     | 42               | 34,4 | 13                      | 33,3 | 29                     | 34,9 |        |
| <b>Minimum 7-day PPA at 6 months (with the use of 12-month or 3-month smoking status if missing)</b>                                         |                  |      |                         |      |                        |      |        |
| Smokers                                                                                                                                      | 122              | 68,5 | 47                      | 72,3 | 75                     | 66,4 | 0,4116 |
| Quitters                                                                                                                                     | 56               | 31,5 | 18                      | 27,7 | 38                     | 33,6 |        |
| <b>Minimum 7-day PPA at 6 months considering non-respondents as smokers</b>                                                                  |                  |      |                         |      |                        |      |        |
| Smokers                                                                                                                                      | 370              | 89,8 | 135                     | 91,2 | 235                    | 89,0 | 0,4787 |
| Quitters                                                                                                                                     | 42               | 10,2 | 13                      | 8,8  | 29                     | 11,0 |        |
| <b>Minimum 7-day PPA at 6 months (with the use of 12-month or 3-month smoking status if missing), considering non-respondents as smokers</b> |                  |      |                         |      |                        |      |        |
| Smokers                                                                                                                                      | 356              | 86,4 | 130                     | 87,8 | 226                    | 85,6 | 0,5260 |
| Quitters                                                                                                                                     | 56               | 13,6 | 18                      | 12,2 | 38                     | 14,4 |        |

\* Chi-square test

Supplementary Table 4c. As Treated analyses / Age

| <b>Age ≤ 45 years</b>                                                                                                                        |      |                         |     |                         |      |      |        |
|----------------------------------------------------------------------------------------------------------------------------------------------|------|-------------------------|-----|-------------------------|------|------|--------|
| Total<br>N= 2163                                                                                                                             |      | Yes<br>N=859<br>(39,7%) |     | No<br>N=1304<br>(60,3%) |      |      |        |
| N                                                                                                                                            | %    | N                       | %   | N                       | %    | p*   |        |
| <b>Minimum 7-day PPA at 6 months</b>                                                                                                         |      |                         |     |                         |      |      |        |
| Smokers                                                                                                                                      | 349  | 64,6                    | 140 | 63,1                    | 209  | 65,7 | 0,5247 |
| Quitters                                                                                                                                     | 191  | 35,4                    | 82  | 36,9                    | 109  | 34,3 |        |
| <b>Minimum 7-day PPA at 6 months (with the use of 12-month or 3-month smoking status if missing)</b>                                         |      |                         |     |                         |      |      |        |
| Smokers                                                                                                                                      | 555  | 66,6                    | 212 | 63,7                    | 343  | 68,6 | 0,1389 |
| Quitters                                                                                                                                     | 278  | 33,4                    | 121 | 36,3                    | 157  | 31,4 |        |
| <b>Minimum 7-day PPA at 6 months considering non-respondents as smokers</b>                                                                  |      |                         |     |                         |      |      |        |
| Smokers                                                                                                                                      | 1972 | 91,2                    | 777 | 90,5                    | 1195 | 91,6 | 0,3411 |
| Quitters                                                                                                                                     | 191  | 8,8                     | 82  | 9,5                     | 109  | 8,4  |        |
| <b>Minimum 7-day PPA at 6 months (with the use of 12-month or 3-month smoking status if missing), considering non-respondents as smokers</b> |      |                         |     |                         |      |      |        |
| Smokers                                                                                                                                      | 1885 | 87,1                    | 738 | 85,9                    | 1147 | 88,0 | 0,1641 |
| Quitters                                                                                                                                     | 278  | 12,9                    | 121 | 14,1                    | 157  | 12,0 |        |
| <b>Age &gt; 45 years</b>                                                                                                                     |      |                         |     |                         |      |      |        |
| Total<br>N= 643                                                                                                                              |      | Yes<br>N=207<br>(32,2%) |     | No<br>N=436<br>(67,8%)  |      |      |        |
| N                                                                                                                                            | %    | N                       | %   | N                       | %    | p*   |        |
| <b>Minimum 7-day PPA at 6 months</b>                                                                                                         |      |                         |     |                         |      |      |        |
| Smokers                                                                                                                                      | 128  | 66,3                    | 41  | 63,1                    | 87   | 68,0 | 0,4968 |
| Quitters                                                                                                                                     | 65   | 33,7                    | 24  | 36,9                    | 41   | 32,0 |        |
| <b>Minimum 7-day PPA at 6 months (with the use of 12-month or 3-month smoking status if missing)</b>                                         |      |                         |     |                         |      |      |        |
| Smokers                                                                                                                                      | 197  | 68,6                    | 67  | 68,4                    | 130  | 68,8 | 0,9426 |
| Quitters                                                                                                                                     | 90   | 31,4                    | 31  | 31,6                    | 59   | 31,2 |        |
| <b>Minimum 7-day PPA at 6 months considering non-respondents as smokers</b>                                                                  |      |                         |     |                         |      |      |        |
| Smokers                                                                                                                                      | 578  | 89,9                    | 183 | 88,4                    | 395  | 90,6 | 0,3893 |
| Quitters                                                                                                                                     | 65   | 10,1                    | 24  | 11,6                    | 41   | 9,4  |        |
| <b>Minimum 7-day PPA at 6 months (with the use of 12-month or 3-month smoking status if missing), considering non-respondents as smokers</b> |      |                         |     |                         |      |      |        |
| Smokers                                                                                                                                      | 553  | 86,0                    | 176 | 85,0                    | 377  | 86,5 | 0,6220 |
| Quitters                                                                                                                                     | 90   | 14,0                    | 31  | 15,0                    | 59   | 13,5 |        |

\* Chi-square test



Supplementary Table 4d. ITT analyses / sex

| <b>Men</b>                                                                                                                                   |                  |      |                         |      |                        |      |        |
|----------------------------------------------------------------------------------------------------------------------------------------------|------------------|------|-------------------------|------|------------------------|------|--------|
|                                                                                                                                              | Total<br>N= 1033 |      | Yes<br>N=511<br>(49,5%) |      | No<br>N=522<br>(50,5%) |      | p*     |
|                                                                                                                                              | N                | %    | N                       | %    | N                      | %    |        |
| <b>Minimum 7-day PPA at 6 months</b>                                                                                                         |                  |      |                         |      |                        |      |        |
| Smokers                                                                                                                                      | 178              | 61,8 | 76                      | 58,9 | 102                    | 64,2 | 0,3631 |
| Quitters                                                                                                                                     | 110              | 38,2 | 53                      | 41,1 | 57                     | 35,8 |        |
| <b>Minimum 7-day PPA at 6 months (with the use of 12-month or 3-month smoking status if missing)</b>                                         |                  |      |                         |      |                        |      |        |
| Smokers                                                                                                                                      | 271              | 64,5 | 119                     | 62,3 | 152                    | 66,4 | 0,3851 |
| Quitters                                                                                                                                     | 149              | 35,5 | 72                      | 37,7 | 77                     | 33,6 |        |
| <b>Minimum 7-day PPA at 6 months considering non-respondents as smokers</b>                                                                  |                  |      |                         |      |                        |      |        |
| Smokers                                                                                                                                      | 923              | 89,4 | 458                     | 89,6 | 465                    | 89,1 | 0,7754 |
| Quitters                                                                                                                                     | 110              | 10,6 | 53                      | 10,4 | 57                     | 10,9 |        |
| <b>Minimum 7-day PPA at 6 months (with the use of 12-month or 3-month smoking status if missing), considering non-respondents as smokers</b> |                  |      |                         |      |                        |      |        |
| Smokers                                                                                                                                      | 884              | 85,6 | 439                     | 85,9 | 445                    | 85,2 | 0,7624 |
| Quitters                                                                                                                                     | 149              | 14,4 | 72                      | 14,1 | 77                     | 14,8 |        |
| <b>Women</b>                                                                                                                                 |                  |      |                         |      |                        |      |        |
|                                                                                                                                              | Total<br>N= 1773 |      | Yes<br>N=889<br>(50,1%) |      | No<br>N=884<br>(49,9%) |      | p*     |
|                                                                                                                                              | N                | %    | N                       | %    | N                      | %    |        |
| <b>Minimum 7-day PPA at 6 months</b>                                                                                                         |                  |      |                         |      |                        |      |        |
| Smokers                                                                                                                                      | 299              | 67,2 | 142                     | 69,3 | 157                    | 65,4 | 0,3884 |
| Quitters                                                                                                                                     | 146              | 32,8 | 63                      | 30,7 | 83                     | 34,6 |        |
| <b>Minimum 7-day PPA at 6 months (with the use of 12-month or 3-month smoking status if missing)</b>                                         |                  |      |                         |      |                        |      |        |
| Smokers                                                                                                                                      | 481              | 68,7 | 223                     | 68,2 | 258                    | 69,2 | 0,7817 |
| Quitters                                                                                                                                     | 219              | 31,3 | 104                     | 31,8 | 115                    | 30,8 |        |
| <b>Minimum 7-day PPA at 6 months considering non-respondents as smokers</b>                                                                  |                  |      |                         |      |                        |      |        |
| Smokers                                                                                                                                      | 1627             | 91,8 | 826                     | 92,9 | 801                    | 90,6 | 0,0778 |
| Quitters                                                                                                                                     | 146              | 8,2  | 63                      | 7,1  | 83                     | 9,4  |        |
| <b>Minimum 7-day PPA at 6 months (with the use of 12-month or 3-month smoking status if missing), considering non-respondents as smokers</b> |                  |      |                         |      |                        |      |        |
| Smokers                                                                                                                                      | 1554             | 87,6 | 785                     | 88,3 | 769                    | 87,0 | 0,4017 |
| Quitters                                                                                                                                     | 219              | 12,4 | 104                     | 11,7 | 115                    | 13,0 |        |

\* Chi-square test

Supplementary Table 4e. PP analyses / sex

| <b>Men</b>                                                                                                                                   |                  |      |                         |      |                        |      |        |
|----------------------------------------------------------------------------------------------------------------------------------------------|------------------|------|-------------------------|------|------------------------|------|--------|
|                                                                                                                                              | Total<br>N= 704  |      | Yes<br>N=278<br>(39,5%) |      | No<br>N=426<br>(60,5%) |      | p*     |
|                                                                                                                                              | N                | %    | N                       | %    | N                      | %    |        |
| <b>Minimum 7-day PPA at 6 months</b>                                                                                                         |                  |      |                         |      |                        |      |        |
| Smokers                                                                                                                                      | 115              | 59,6 | 39                      | 54,2 | 76                     | 62,8 | 0,2367 |
| Quitters                                                                                                                                     | 78               | 40,4 | 33                      | 45,8 | 45                     | 37,2 |        |
| <b>Minimum 7-day PPA at 6 months (with the use of 12-month or 3-month smoking status if missing)</b>                                         |                  |      |                         |      |                        |      |        |
| Smokers                                                                                                                                      | 178              | 63,6 | 61                      | 59,8 | 117                    | 65,7 | 0,3214 |
| Quitters                                                                                                                                     | 102              | 36,4 | 41                      | 40,2 | 61                     | 34,3 |        |
| <b>Minimum 7-day PPA at 6 months considering non-respondents as smokers</b>                                                                  |                  |      |                         |      |                        |      |        |
| Smokers                                                                                                                                      | 626              | 88,9 | 245                     | 88,1 | 381                    | 89,4 | 0,5891 |
| Quitters                                                                                                                                     | 78               | 11,1 | 33                      | 11,9 | 45                     | 10,6 |        |
| <b>Minimum 7-day PPA at 6 months (with the use of 12-month or 3-month smoking status if missing), considering non-respondents as smokers</b> |                  |      |                         |      |                        |      |        |
| Smokers                                                                                                                                      | 602              | 85,5 | 237                     | 85,3 | 365                    | 85,7 | 0,8744 |
| Quitters                                                                                                                                     | 102              | 14,5 | 41                      | 14,7 | 61                     | 14,3 |        |
| <b>Women</b>                                                                                                                                 |                  |      |                         |      |                        |      |        |
|                                                                                                                                              | Total<br>N= 1210 |      | Yes<br>N=509<br>(42,1%) |      | No<br>N=701<br>(57,9%) |      | p*     |
|                                                                                                                                              | N                | %    | N                       | %    | N                      | %    |        |
| <b>Minimum 7-day PPA at 6 months</b>                                                                                                         |                  |      |                         |      |                        |      |        |
| Smokers                                                                                                                                      | 219              | 69,1 | 89                      | 70,1 | 130                    | 68,4 | 0,7543 |
| Quitters                                                                                                                                     | 98               | 30,9 | 38                      | 29,9 | 60                     | 31,6 |        |
| <b>Minimum 7-day PPA at 6 months (with the use of 12-month or 3-month smoking status if missing)</b>                                         |                  |      |                         |      |                        |      |        |
| Smokers                                                                                                                                      | 335              | 69,9 | 130                     | 67,7 | 205                    | 71,4 | 0,3842 |
| Quitters                                                                                                                                     | 144              | 30,1 | 62                      | 32,3 | 82                     | 28,6 |        |
| <b>Minimum 7-day PPA at 6 months considering non-respondents as smokers</b>                                                                  |                  |      |                         |      |                        |      |        |
| Smokers                                                                                                                                      | 1112             | 91,9 | 471                     | 92,5 | 641                    | 91,4 | 0,4912 |
| Quitters                                                                                                                                     | 98               | 8,1  | 38                      | 7,5  | 60                     | 8,6  |        |
| <b>Minimum 7-day PPA at 6 months (with the use of 12-month or 3-month smoking status if missing), considering non-respondents as smokers</b> |                  |      |                         |      |                        |      |        |
| Smokers                                                                                                                                      | 1066             | 88,1 | 447                     | 87,8 | 619                    | 88,3 | 0,7978 |
| Quitters                                                                                                                                     | 144              | 11,9 | 62                      | 12,2 | 82                     | 11,7 |        |

\* Chi-square test

Supplementary Table 4f. As Treated analyses / sex

| <b>Men</b>                                                                                                                                   |                  |      |                         |      |                         |      |        |
|----------------------------------------------------------------------------------------------------------------------------------------------|------------------|------|-------------------------|------|-------------------------|------|--------|
|                                                                                                                                              | Total<br>N= 1033 |      | Yes<br>N=374<br>(36,2%) |      | No<br>N=659<br>(63,8%)  |      | p*     |
|                                                                                                                                              | N                | %    | N                       | %    | N                       | %    |        |
| <b>Minimum 7-day PPA at 6 months</b>                                                                                                         |                  |      |                         |      |                         |      |        |
| Smokers                                                                                                                                      | 178              | 61,8 | 65                      | 59,1 | 113                     | 63,5 | 0,4560 |
| Quitters                                                                                                                                     | 110              | 38,2 | 45                      | 40,9 | 65                      | 36,5 |        |
| <b>Minimum 7-day PPA at 6 months (with the use of 12-month or 3-month smoking status if missing)</b>                                         |                  |      |                         |      |                         |      |        |
| Smokers                                                                                                                                      | 271              | 64,5 | 96                      | 62,7 | 175                     | 65,5 | 0,5641 |
| Quitters                                                                                                                                     | 149              | 35,5 | 57                      | 37,3 | 92                      | 34,5 |        |
| <b>Minimum 7-day PPA at 6 months considering non-respondents as smokers</b>                                                                  |                  |      |                         |      |                         |      |        |
| Smokers                                                                                                                                      | 923              | 89,4 | 329                     | 88,0 | 594                     | 90,1 | 0,2775 |
| Quitters                                                                                                                                     | 110              | 10,6 | 45                      | 12,0 | 65                      | 9,9  |        |
| <b>Minimum 7-day PPA at 6 months (with the use of 12-month or 3-month smoking status if missing), considering non-respondents as smokers</b> |                  |      |                         |      |                         |      |        |
| Smokers                                                                                                                                      | 884              | 85,6 | 317                     | 84,8 | 567                     | 86,0 | 0,5736 |
| Quitters                                                                                                                                     | 149              | 14,4 | 57                      | 15,2 | 92                      | 14,0 |        |
| <b>Women</b>                                                                                                                                 |                  |      |                         |      |                         |      |        |
|                                                                                                                                              | Total<br>N= 1773 |      | Yes<br>N=692<br>(39,0%) |      | No<br>N=1081<br>(61,0%) |      | p*     |
|                                                                                                                                              | N                | %    | N                       | %    | N                       | %    |        |
| <b>Minimum 7-day PPA at 6 months</b>                                                                                                         |                  |      |                         |      |                         |      |        |
| Smokers                                                                                                                                      | 299              | 67,2 | 116                     | 65,5 | 183                     | 68,3 | 0,5458 |
| Quitters                                                                                                                                     | 146              | 32,8 | 61                      | 34,5 | 85                      | 31,7 |        |
| <b>Minimum 7-day PPA at 6 months (with the use of 12-month or 3-month smoking status if missing)</b>                                         |                  |      |                         |      |                         |      |        |
| Smokers                                                                                                                                      | 481              | 68,7 | 183                     | 65,8 | 298                     | 70,6 | 0,1812 |
| Quitters                                                                                                                                     | 219              | 31,3 | 95                      | 34,2 | 124                     | 29,4 |        |
| <b>Minimum 7-day PPA at 6 months considering non-respondents as smokers</b>                                                                  |                  |      |                         |      |                         |      |        |
| Smokers                                                                                                                                      | 1627             | 91,8 | 631                     | 91,2 | 996                     | 92,1 | 0,4769 |
| Quitters                                                                                                                                     | 146              | 8,2  | 61                      | 8,8  | 85                      | 7,9  |        |
| <b>Minimum 7-day PPA at 6 months (with the use of 12-month or 3-month smoking status if missing), considering non-respondents as smokers</b> |                  |      |                         |      |                         |      |        |
| Smokers                                                                                                                                      | 1554             | 87,6 | 597                     | 86,3 | 957                     | 88,5 | 0,1588 |
| Quitters                                                                                                                                     | 219              | 12,4 | 95                      | 13,7 | 124                     | 11,5 |        |

\* Chi-square test

Supplementary Table 4g. ITT analyses / Family or adoption planning

| <b>Yes</b>                                                                                                                                   |                  |      |                          |      |                         |      |        |
|----------------------------------------------------------------------------------------------------------------------------------------------|------------------|------|--------------------------|------|-------------------------|------|--------|
|                                                                                                                                              | Total<br>N= 338  |      | Yes<br>N=156<br>(46,2%)  |      | No<br>N=182<br>(53,8%)  |      | p*     |
|                                                                                                                                              | N                | %    | N                        | %    | N                       | %    |        |
| <b>Minimum 7-day PPA at 6 months</b>                                                                                                         |                  |      |                          |      |                         |      | 0,8599 |
| Smokers                                                                                                                                      | 47               | 54,7 | 22                       | 53,7 | 25                      | 55,6 |        |
| Quitters                                                                                                                                     | 39               | 45,3 | 19                       | 46,3 | 20                      | 44,4 |        |
| <b>Minimum 7-day PPA at 6 months (with the use of 12-month or 3-month smoking status if missing)</b>                                         |                  |      |                          |      |                         |      | 0,8020 |
| Smokers                                                                                                                                      | 75               | 59,5 | 37                       | 60,7 | 38                      | 58,5 |        |
| Quitters                                                                                                                                     | 51               | 40,5 | 24                       | 39,3 | 27                      | 41,5 |        |
| <b>Minimum 7-day PPA at 6 months considering non-respondents as smokers</b>                                                                  |                  |      |                          |      |                         |      | 0,7327 |
| Smokers                                                                                                                                      | 299              | 88,5 | 137                      | 87,8 | 162                     | 89,0 |        |
| Quitters                                                                                                                                     | 39               | 11,5 | 19                       | 12,2 | 20                      | 11,0 |        |
| <b>Minimum 7-day PPA at 6 months (with the use of 12-month or 3-month smoking status if missing), considering non-respondents as smokers</b> |                  |      |                          |      |                         |      | 0,8881 |
| Smokers                                                                                                                                      | 287              | 84,9 | 132                      | 84,6 | 155                     | 85,2 |        |
| Quitters                                                                                                                                     | 51               | 15,1 | 24                       | 15,4 | 27                      | 14,8 |        |
| <b>No</b>                                                                                                                                    |                  |      |                          |      |                         |      |        |
|                                                                                                                                              | Total<br>N= 2433 |      | Yes<br>N=1223<br>(50,3%) |      | No<br>N=1210<br>(49,7%) |      | p*     |
|                                                                                                                                              | N                | %    | N                        | %    | N                       | %    |        |
| <b>Minimum 7-day PPA at 6 months</b>                                                                                                         |                  |      |                          |      |                         |      | 0,8751 |
| Smokers                                                                                                                                      | 428              | 66,5 | 195                      | 66,8 | 233                     | 66,2 |        |
| Quitters                                                                                                                                     | 216              | 33,5 | 97                       | 33,2 | 119                     | 33,8 |        |
| <b>Minimum 7-day PPA at 6 months (with the use of 12-month or 3-month smoking status if missing)</b>                                         |                  |      |                          |      |                         |      | 0,3630 |
| Smokers                                                                                                                                      | 671              | 68,1 | 303                      | 66,6 | 368                     | 69,3 |        |
| Quitters                                                                                                                                     | 315              | 31,9 | 152                      | 33,4 | 163                     | 30,7 |        |
| <b>Minimum 7-day PPA at 6 months considering non-respondents as smokers</b>                                                                  |                  |      |                          |      |                         |      | 0,0989 |
| Smokers                                                                                                                                      | 2217             | 91,1 | 1126                     | 92,1 | 1091                    | 90,2 |        |
| Quitters                                                                                                                                     | 216              | 8,9  | 97                       | 7,9  | 119                     | 9,8  |        |
| <b>Minimum 7-day PPA at 6 months (with the use of 12-month or 3-month smoking status if missing), considering non-respondents as smokers</b> |                  |      |                          |      |                         |      | 0,4437 |
| Smokers                                                                                                                                      | 2118             | 87,1 | 1071                     | 87,6 | 1047                    | 86,5 |        |
| Quitters                                                                                                                                     | 315              | 12,9 | 152                      | 12,4 | 163                     | 13,5 |        |

\* Chi-square test

**Supplementary Table 4h. PP analyses / Family or adoption planning**

| <b>Yes</b>                                                                                                                                   |                  |      |                         |      |                        |      |        |
|----------------------------------------------------------------------------------------------------------------------------------------------|------------------|------|-------------------------|------|------------------------|------|--------|
|                                                                                                                                              | Total<br>N= 252  |      | Yes<br>N=102<br>(40,5%) |      | No<br>N=150<br>(59,5%) |      | p*     |
|                                                                                                                                              | N                | %    | N                       | %    | N                      | %    |        |
| <b>Minimum 7-day PPA at 6 months</b>                                                                                                         |                  |      |                         |      |                        |      | 0,9073 |
| Smokers                                                                                                                                      | 40               | 58,8 | 18                      | 58,1 | 22                     | 59,5 |        |
| Quitters                                                                                                                                     | 28               | 41,2 | 13                      | 41,9 | 15                     | 40,5 |        |
| <b>Minimum 7-day PPA at 6 months (with the use of 12-month or 3-month smoking status if missing)</b>                                         |                  |      |                         |      |                        |      | 0,9883 |
| Smokers                                                                                                                                      | 57               | 63,3 | 26                      | 63,4 | 31                     | 63,3 |        |
| Quitters                                                                                                                                     | 33               | 36,7 | 15                      | 36,6 | 18                     | 36,7 |        |
| <b>Minimum 7-day PPA at 6 months considering non-respondents as smokers</b>                                                                  |                  |      |                         |      |                        |      | 0,4961 |
| Smokers                                                                                                                                      | 224              | 88,9 | 89                      | 87,3 | 135                    | 90,0 |        |
| Quitters                                                                                                                                     | 28               | 11,1 | 13                      | 12,7 | 15                     | 10,0 |        |
| <b>Minimum 7-day PPA at 6 months (with the use of 12-month or 3-month smoking status if missing), considering non-respondents as smokers</b> |                  |      |                         |      |                        |      | 0,5320 |
| Smokers                                                                                                                                      | 219              | 86,9 | 87                      | 85,3 | 132                    | 88,0 |        |
| Quitters                                                                                                                                     | 33               | 13,1 | 15                      | 14,7 | 18                     | 12,0 |        |
| <b>No</b>                                                                                                                                    |                  |      |                         |      |                        |      |        |
|                                                                                                                                              | Total<br>N= 1643 |      | Yes<br>N=677<br>(41,2%) |      | No<br>N=966<br>(58,8%) |      | p*     |
|                                                                                                                                              | N                | %    | N                       | %    | N                      | %    |        |
| <b>Minimum 7-day PPA at 6 months</b>                                                                                                         |                  |      |                         |      |                        |      | 0,7169 |
| Smokers                                                                                                                                      | 294              | 66,5 | 110                     | 65,5 | 184                    | 67,2 |        |
| Quitters                                                                                                                                     | 148              | 33,5 | 58                      | 34,5 | 90                     | 32,8 |        |
| <b>Minimum 7-day PPA at 6 months (with the use of 12-month or 3-month smoking status if missing)</b>                                         |                  |      |                         |      |                        |      | 0,2081 |
| Smokers                                                                                                                                      | 453              | 68,1 | 165                     | 65,2 | 288                    | 69,9 |        |
| Quitters                                                                                                                                     | 212              | 31,9 | 88                      | 34,8 | 124                    | 30,1 |        |
| <b>Minimum 7-day PPA at 6 months considering non-respondents as smokers</b>                                                                  |                  |      |                         |      |                        |      | 0,6014 |
| Smokers                                                                                                                                      | 1495             | 91,0 | 619                     | 91,4 | 876                    | 90,7 |        |
| Quitters                                                                                                                                     | 148              | 9,0  | 58                      | 8,6  | 90                     | 9,3  |        |
| <b>Minimum 7-day PPA at 6 months (with the use of 12-month or 3-month smoking status if missing), considering non-respondents as smokers</b> |                  |      |                         |      |                        |      | 0,9232 |
| Smokers                                                                                                                                      | 1431             | 87,1 | 589                     | 87,0 | 842                    | 87,2 |        |
| Quitters                                                                                                                                     | 212              | 12,9 | 88                      | 13,0 | 124                    | 12,8 |        |

\* Chi-square test

**Supplementary Table 4i. As Treated analyses / Family or adoption planning**

| <b>Yes</b>                                                                                                                                   |                  |      |                         |      |                         |      |        |
|----------------------------------------------------------------------------------------------------------------------------------------------|------------------|------|-------------------------|------|-------------------------|------|--------|
|                                                                                                                                              | Total<br>N= 338  |      | Yes<br>N=134<br>(39,6%) |      | No<br>N=204<br>(60,4%)  |      | p*     |
|                                                                                                                                              | N                | %    | N                       | %    | N                       | %    |        |
| <b>Minimum 7-day PPA at 6 months</b>                                                                                                         |                  |      |                         |      |                         |      | 0,8913 |
| Smokers                                                                                                                                      | 47               | 54,7 | 21                      | 53,8 | 26                      | 55,3 |        |
| Quitters                                                                                                                                     | 39               | 45,3 | 18                      | 46,2 | 21                      | 44,7 |        |
| <b>Minimum 7-day PPA at 6 months (with the use of 12-month or 3-month smoking status if missing)</b>                                         |                  |      |                         |      |                         |      | 0,7349 |
| Smokers                                                                                                                                      | 75               | 59,5 | 33                      | 57,9 | 42                      | 60,9 |        |
| Quitters                                                                                                                                     | 51               | 40,5 | 24                      | 42,1 | 27                      | 39,1 |        |
| <b>Minimum 7-day PPA at 6 months considering non-respondents as smokers</b>                                                                  |                  |      |                         |      |                         |      | 0,3770 |
| Smokers                                                                                                                                      | 299              | 88,5 | 116                     | 86,6 | 183                     | 89,7 |        |
| Quitters                                                                                                                                     | 39               | 11,5 | 18                      | 13,4 | 21                      | 10,3 |        |
| <b>Minimum 7-day PPA at 6 months (with the use of 12-month or 3-month smoking status if missing), considering non-respondents as smokers</b> |                  |      |                         |      |                         |      | 0,2401 |
| Smokers                                                                                                                                      | 287              | 84,9 | 110                     | 82,1 | 177                     | 86,8 |        |
| Quitters                                                                                                                                     | 51               | 15,1 | 24                      | 17,9 | 27                      | 13,2 |        |
| <b>No</b>                                                                                                                                    |                  |      |                         |      |                         |      |        |
|                                                                                                                                              | Total<br>N= 2433 |      | Yes<br>N=921<br>(37,9%) |      | No<br>N=1512<br>(62,1%) |      | p*     |
|                                                                                                                                              | N                | %    | N                       | %    | N                       | %    |        |
| <b>Minimum 7-day PPA at 6 months</b>                                                                                                         |                  |      |                         |      |                         |      | 0,4405 |
| Smokers                                                                                                                                      | 428              | 66,5 | 159                     | 64,6 | 269                     | 67,6 |        |
| Quitters                                                                                                                                     | 216              | 33,5 | 87                      | 35,4 | 129                     | 32,4 |        |
| <b>Minimum 7-day PPA at 6 months (with the use of 12-month or 3-month smoking status if missing)</b>                                         |                  |      |                         |      |                         |      | 0,2504 |
| Smokers                                                                                                                                      | 671              | 68,1 | 245                     | 65,9 | 426                     | 69,4 |        |
| Quitters                                                                                                                                     | 315              | 31,9 | 127                     | 34,1 | 188                     | 30,6 |        |
| <b>Minimum 7-day PPA at 6 months considering non-respondents as smokers</b>                                                                  |                  |      |                         |      |                         |      | 0,4418 |
| Smokers                                                                                                                                      | 2217             | 91,1 | 834                     | 90,6 | 1383                    | 91,5 |        |
| Quitters                                                                                                                                     | 216              | 8,9  | 87                      | 9,4  | 129                     | 8,5  |        |
| <b>Minimum 7-day PPA at 6 months (with the use of 12-month or 3-month smoking status if missing), considering non-respondents as smokers</b> |                  |      |                         |      |                         |      | 0,3341 |
| Smokers                                                                                                                                      | 2118             | 87,1 | 794                     | 86,2 | 1324                    | 87,6 |        |
| Quitters                                                                                                                                     | 315              | 12,9 | 127                     | 13,8 | 188                     | 12,4 |        |

\* Chi-square test

**Supplementary Table 4j. ITT analyses / Tobacco status at inclusion**

| <b>Smokers</b>                                                                                                                               |                  |      |                         |      |                        |      |        |
|----------------------------------------------------------------------------------------------------------------------------------------------|------------------|------|-------------------------|------|------------------------|------|--------|
|                                                                                                                                              | Total<br>N= 1881 |      | Yes<br>N=931<br>(49,5%) |      | No<br>N=950<br>(50,5%) |      | p*     |
|                                                                                                                                              | N                | %    | N                       | %    | N                      | %    |        |
| <b>Minimum 7-day PPA at 6 months</b>                                                                                                         |                  |      |                         |      |                        |      | 0,9587 |
| Smokers                                                                                                                                      | 337              | 72,6 | 153                     | 72,5 | 184                    | 72,7 |        |
| Quitters                                                                                                                                     | 127              | 27,4 | 58                      | 27,5 | 69                     | 27,3 |        |
| <b>Minimum 7-day PPA at 6 months (with the use of 12-month or 3-month smoking status if missing)</b>                                         |                  |      |                         |      |                        |      | 0,3667 |
| Smokers                                                                                                                                      | 538              | 75,7 | 237                     | 74,1 | 301                    | 77,0 |        |
| Quitters                                                                                                                                     | 173              | 24,3 | 83                      | 25,9 | 90                     | 23,0 |        |
| <b>Minimum 7-day PPA at 6 months considering non-respondents as smokers</b>                                                                  |                  |      |                         |      |                        |      | 0,3719 |
| Smokers                                                                                                                                      | 1754             | 93,2 | 873                     | 93,8 | 881                    | 92,7 |        |
| Quitters                                                                                                                                     | 127              | 6,8  | 58                      | 6,2  | 69                     | 7,3  |        |
| <b>Minimum 7-day PPA at 6 months (with the use of 12-month or 3-month smoking status if missing), considering non-respondents as smokers</b> |                  |      |                         |      |                        |      | 0,6751 |
| Smokers                                                                                                                                      | 1708             | 90,8 | 848                     | 91,1 | 860                    | 90,5 |        |
| Quitters                                                                                                                                     | 173              | 9,2  | 83                      | 8,9  | 90                     | 9,5  |        |
| <b>Quitters</b>                                                                                                                              |                  |      |                         |      |                        |      |        |
|                                                                                                                                              | Total<br>N= 925  |      | Yes<br>N=469<br>(50,7%) |      | No<br>N=456<br>(49,3%) |      | p*     |
|                                                                                                                                              | N                | %    | N                       | %    | N                      | %    |        |
| <b>Minimum 7-day PPA at 6 months</b>                                                                                                         |                  |      |                         |      |                        |      | 0,8093 |
| Smokers                                                                                                                                      | 140              | 52,0 | 65                      | 52,8 | 75                     | 51,4 |        |
| Quitters                                                                                                                                     | 129              | 48,0 | 58                      | 47,2 | 71                     | 48,6 |        |
| <b>Minimum 7-day PPA at 6 months (with the use of 12-month or 3-month smoking status if missing)</b>                                         |                  |      |                         |      |                        |      | 0,7814 |
| Smokers                                                                                                                                      | 214              | 52,3 | 105                     | 53,0 | 109                    | 51,7 |        |
| Quitters                                                                                                                                     | 195              | 47,7 | 93                      | 47,0 | 102                    | 48,3 |        |
| <b>Minimum 7-day PPA at 6 months considering non-respondents as smokers</b>                                                                  |                  |      |                         |      |                        |      | 0,1597 |
| Smokers                                                                                                                                      | 796              | 86,1 | 411                     | 87,6 | 385                    | 84,4 |        |
| Quitters                                                                                                                                     | 129              | 13,9 | 58                      | 12,4 | 71                     | 15,6 |        |
| <b>Minimum 7-day PPA at 6 months (with the use of 12-month or 3-month smoking status if missing), considering non-respondents as smokers</b> |                  |      |                         |      |                        |      | 0,3439 |
| Smokers                                                                                                                                      | 730              | 78,9 | 376                     | 80,2 | 354                    | 77,6 |        |
| Quitters                                                                                                                                     | 195              | 21,1 | 93                      | 19,8 | 102                    | 22,4 |        |

\* Chi-square test

**Supplementary Table 4k. PP analyses / Tobacco status at inclusion**

| <b>Smokers</b>                                                                                                                               |                  |      |                         |      |                        |      |        |
|----------------------------------------------------------------------------------------------------------------------------------------------|------------------|------|-------------------------|------|------------------------|------|--------|
|                                                                                                                                              | Total<br>N= 1287 |      | Yes<br>N=526<br>(40,9%) |      | No<br>N=761<br>(59,1%) |      | p*     |
|                                                                                                                                              | N                | %    | N                       | %    | N                      | %    |        |
| <b>Minimum 7-day PPA at 6 months</b>                                                                                                         |                  |      |                         |      |                        |      | 0,1905 |
| Smokers                                                                                                                                      | 238              | 72,3 | 91                      | 68,4 | 147                    | 75,0 |        |
| Quitters                                                                                                                                     | 91               | 27,7 | 42                      | 31,6 | 49                     | 25,0 |        |
| <b>Minimum 7-day PPA at 6 months (with the use of 12-month or 3-month smoking status if missing)</b>                                         |                  |      |                         |      |                        |      | 0,0476 |
| Smokers                                                                                                                                      | 371              | 75,3 | 133                     | 70,4 | 238                    | 78,3 |        |
| Quitters                                                                                                                                     | 122              | 24,7 | 56                      | 29,6 | 66                     | 21,7 |        |
| <b>Minimum 7-day PPA at 6 months considering non-respondents as smokers</b>                                                                  |                  |      |                         |      |                        |      | 0,2875 |
| Smokers                                                                                                                                      | 1196             | 92,9 | 484                     | 92,0 | 712                    | 93,6 |        |
| Quitters                                                                                                                                     | 91               | 7,1  | 42                      | 8,0  | 49                     | 6,4  |        |
| <b>Minimum 7-day PPA at 6 months (with the use of 12-month or 3-month smoking status if missing), considering non-respondents as smokers</b> |                  |      |                         |      |                        |      | 0,2348 |
| Smokers                                                                                                                                      | 1165             | 90,5 | 470                     | 89,4 | 695                    | 91,3 |        |
| Quitters                                                                                                                                     | 122              | 9,5  | 56                      | 10,6 | 66                     | 8,7  |        |
| <b>Quitters</b>                                                                                                                              |                  |      |                         |      |                        |      |        |
|                                                                                                                                              | Total<br>N= 627  |      | Yes<br>N=261<br>(41,6%) |      | No<br>N=366<br>(58,4%) |      | p*     |
|                                                                                                                                              | N                | %    | N                       | %    | N                      | %    |        |
| <b>Minimum 7-day PPA at 6 months</b>                                                                                                         |                  |      |                         |      |                        |      | 0,5371 |
| Smokers                                                                                                                                      | 96               | 53,0 | 37                      | 56,1 | 59                     | 51,3 |        |
| Quitters                                                                                                                                     | 85               | 47,0 | 29                      | 43,9 | 56                     | 48,7 |        |
| <b>Minimum 7-day PPA at 6 months (with the use of 12-month or 3-month smoking status if missing)</b>                                         |                  |      |                         |      |                        |      | 0,6244 |
| Smokers                                                                                                                                      | 142              | 53,4 | 58                      | 55,2 | 84                     | 52,2 |        |
| Quitters                                                                                                                                     | 124              | 46,6 | 47                      | 44,8 | 77                     | 47,8 |        |
| <b>Minimum 7-day PPA at 6 months considering non-respondents as smokers</b>                                                                  |                  |      |                         |      |                        |      | 0,1309 |
| Smokers                                                                                                                                      | 542              | 86,4 | 232                     | 88,9 | 310                    | 84,7 |        |
| Quitters                                                                                                                                     | 85               | 13,6 | 29                      | 11,1 | 56                     | 15,3 |        |
| <b>Minimum 7-day PPA at 6 months (with the use of 12-month or 3-month smoking status if missing), considering non-respondents as smokers</b> |                  |      |                         |      |                        |      | 0,3477 |
| Smokers                                                                                                                                      | 503              | 80,2 | 214                     | 82,0 | 289                    | 79,0 |        |
| Quitters                                                                                                                                     | 124              | 19,8 | 47                      | 18,0 | 77                     | 21,0 |        |

\* Chi-square test



**Supplementary Table 4I. As Treated analyses / Tobacco status at inclusion**

| <b>Smokers</b>                                                                                                                               |                  |      |                         |      |                         |      |               |
|----------------------------------------------------------------------------------------------------------------------------------------------|------------------|------|-------------------------|------|-------------------------|------|---------------|
|                                                                                                                                              | Total<br>N= 1881 |      | Yes<br>N=715<br>(38,0%) |      | No<br>N=1166<br>(62,0%) |      | p*            |
|                                                                                                                                              | N                | %    | N                       | %    | N                       | %    |               |
| <b>Minimum 7-day PPA at 6 months</b>                                                                                                         |                  |      |                         |      |                         |      |               |
| Smokers                                                                                                                                      | 337              | 72,6 | 128                     | 67,4 | 209                     | 76,3 | <b>0,0343</b> |
| Quitters                                                                                                                                     | 127              | 27,4 | 62                      | 32,6 | 65                      | 23,7 |               |
| <b>Minimum 7-day PPA at 6 months (with the use of 12-month or 3-month smoking status if missing)</b>                                         |                  |      |                         |      |                         |      |               |
| Smokers                                                                                                                                      | 538              | 75,7 | 196                     | 71,0 | 342                     | 78,6 | <b>0,0213</b> |
| Quitters                                                                                                                                     | 173              | 24,3 | 80                      | 29,0 | 93                      | 21,4 |               |
| <b>Minimum 7-day PPA at 6 months considering non-respondents as smokers</b>                                                                  |                  |      |                         |      |                         |      |               |
| Smokers                                                                                                                                      | 1754             | 93,2 | 653                     | 91,3 | 1101                    | 94,4 | <b>0,0094</b> |
| Quitters                                                                                                                                     | 127              | 6,8  | 62                      | 8,7  | 65                      | 5,6  |               |
| <b>Minimum 7-day PPA at 6 months (with the use of 12-month or 3-month smoking status if missing), considering non-respondents as smokers</b> |                  |      |                         |      |                         |      |               |
| Smokers                                                                                                                                      | 1708             | 90,8 | 635                     | 88,8 | 1073                    | 92,0 | <b>0,0193</b> |
| Quitters                                                                                                                                     | 173              | 9,2  | 80                      | 11,2 | 93                      | 8,0  |               |
| <b>Quitters</b>                                                                                                                              |                  |      |                         |      |                         |      |               |
|                                                                                                                                              | Total<br>N= 925  |      | Yes<br>N=351<br>(37,9%) |      | No<br>N=574<br>(62,1%)  |      | p*            |
|                                                                                                                                              | N                | %    | N                       | %    | N                       | %    |               |
| <b>Minimum 7-day PPA at 6 months</b>                                                                                                         |                  |      |                         |      |                         |      |               |
| Smokers                                                                                                                                      | 140              | 52,0 | 53                      | 54,6 | 87                      | 50,6 | 0,5224        |
| Quitters                                                                                                                                     | 129              | 48,0 | 44                      | 45,4 | 85                      | 49,4 |               |
| <b>Minimum 7-day PPA at 6 months (with the use of 12-month or 3-month smoking status if missing)</b>                                         |                  |      |                         |      |                         |      |               |
| Smokers                                                                                                                                      | 214              | 52,3 | 83                      | 53,5 | 131                     | 51,6 | 0,6983        |
| Quitters                                                                                                                                     | 195              | 47,7 | 72                      | 46,5 | 123                     | 48,4 |               |
| <b>Minimum 7-day PPA at 6 months considering non-respondents as smokers</b>                                                                  |                  |      |                         |      |                         |      |               |
| Smokers                                                                                                                                      | 796              | 86,1 | 307                     | 87,5 | 489                     | 85,2 | 0,3329        |
| Quitters                                                                                                                                     | 129              | 13,9 | 44                      | 12,5 | 85                      | 14,8 |               |
| <b>Minimum 7-day PPA at 6 months (with the use of 12-month or 3-month smoking status if missing), considering non-respondents as smokers</b> |                  |      |                         |      |                         |      |               |
| Smokers                                                                                                                                      | 730              | 78,9 | 279                     | 79,5 | 451                     | 78,6 | 0,7404        |
| Quitters                                                                                                                                     | 195              | 21,1 | 72                      | 20,5 | 123                     | 21,4 |               |

\* Chi-square test

Supplementary Table 4m. ITT analyses / Year of inclusion

| 2017                                                                                                                                         |                  |      |                         |      |                        |      |        |
|----------------------------------------------------------------------------------------------------------------------------------------------|------------------|------|-------------------------|------|------------------------|------|--------|
|                                                                                                                                              | Total<br>N= 875  |      | Yes<br>N=450<br>(51,4%) |      | No<br>N=425<br>(48,6%) |      | p*     |
|                                                                                                                                              | N                | %    | N                       | %    | N                      | %    |        |
| <b>Minimum 7-day PPA at 6 months</b>                                                                                                         |                  |      |                         |      |                        |      |        |
| Smokers                                                                                                                                      | 136              | 60,4 | 64                      | 62,1 | 72                     | 59,0 | 0,6335 |
| Quitters                                                                                                                                     | 89               | 39,6 | 39                      | 37,9 | 50                     | 41,0 |        |
| <b>Minimum 7-day PPA at 6 months (with the use of 12-month or 3-month smoking status if missing)</b>                                         |                  |      |                         |      |                        |      |        |
| Smokers                                                                                                                                      | 241              | 65,8 | 110                     | 63,2 | 131                    | 68,2 | 0,3127 |
| Quitters                                                                                                                                     | 125              | 34,2 | 64                      | 36,8 | 61                     | 31,8 |        |
| <b>Minimum 7-day PPA at 6 months considering non-respondents as smokers</b>                                                                  |                  |      |                         |      |                        |      |        |
| Smokers                                                                                                                                      | 786              | 89,8 | 411                     | 91,3 | 375                    | 88,2 | 0,1297 |
| Quitters                                                                                                                                     | 89               | 10,2 | 39                      | 8,7  | 50                     | 11,8 |        |
| <b>Minimum 7-day PPA at 6 months (with the use of 12-month or 3-month smoking status if missing), considering non-respondents as smokers</b> |                  |      |                         |      |                        |      |        |
| Smokers                                                                                                                                      | 750              | 85,7 | 386                     | 85,8 | 364                    | 85,6 | 0,9560 |
| Quitters                                                                                                                                     | 125              | 14,3 | 64                      | 14,2 | 61                     | 14,4 |        |
| 2018                                                                                                                                         |                  |      |                         |      |                        |      |        |
|                                                                                                                                              | Total<br>N= 1931 |      | Yes<br>N=950<br>(49,2%) |      | No<br>N=981<br>(50,8%) |      | p*     |
|                                                                                                                                              | N                | %    | N                       | %    | N                      | %    |        |
| <b>Minimum 7-day PPA at 6 months</b>                                                                                                         |                  |      |                         |      |                        |      |        |
| Smokers                                                                                                                                      | 341              | 67,1 | 154                     | 66,7 | 187                    | 67,5 | 0,8405 |
| Quitters                                                                                                                                     | 167              | 32,9 | 77                      | 33,3 | 90                     | 32,5 |        |
| <b>Minimum 7-day PPA at 6 months (with the use of 12-month or 3-month smoking status if missing)</b>                                         |                  |      |                         |      |                        |      |        |
| Smokers                                                                                                                                      | 511              | 67,8 | 232                     | 67,4 | 279                    | 68,0 | 0,8590 |
| Quitters                                                                                                                                     | 243              | 32,2 | 112                     | 32,6 | 131                    | 32,0 |        |
| <b>Minimum 7-day PPA at 6 months considering non-respondents as smokers</b>                                                                  |                  |      |                         |      |                        |      |        |
| Smokers                                                                                                                                      | 1764             | 91,4 | 873                     | 91,9 | 891                    | 90,8 | 0,4034 |
| Quitters                                                                                                                                     | 167              | 8,6  | 77                      | 8,1  | 90                     | 9,2  |        |
| <b>Minimum 7-day PPA at 6 months (with the use of 12-month or 3-month smoking status if missing), considering non-respondents as smokers</b> |                  |      |                         |      |                        |      |        |
| Smokers                                                                                                                                      | 1688             | 87,4 | 838                     | 88,2 | 850                    | 86,6 | 0,3002 |
| Quitters                                                                                                                                     | 243              | 12,6 | 112                     | 11,8 | 131                    | 13,4 |        |

\* Chi-square test

Supplementary Table 4n. PP analyses / Year of inclusion

| 2017                                                                                                                                         |                  |      |                         |      |                        |      |        |
|----------------------------------------------------------------------------------------------------------------------------------------------|------------------|------|-------------------------|------|------------------------|------|--------|
|                                                                                                                                              | Total<br>N= 574  |      | Yes<br>N=279<br>(48,6%) |      | No<br>N=295<br>(51,4%) |      | p*     |
|                                                                                                                                              | N                | %    | N                       | %    | N                      | %    |        |
| <b>Minimum 7-day PPA at 6 months</b>                                                                                                         |                  |      |                         |      |                        |      | 0,7410 |
| Smokers                                                                                                                                      | 91               | 60,3 | 43                      | 58,9 | 48                     | 61,5 |        |
| Quitters                                                                                                                                     | 60               | 39,7 | 30                      | 41,1 | 30                     | 38,5 |        |
| <b>Minimum 7-day PPA at 6 months (with the use of 12-month or 3-month smoking status if missing)</b>                                         |                  |      |                         |      |                        |      | 0,1185 |
| Smokers                                                                                                                                      | 158              | 66,1 | 69                      | 61,1 | 89                     | 70,6 |        |
| Quitters                                                                                                                                     | 81               | 33,9 | 44                      | 38,9 | 37                     | 29,4 |        |
| <b>Minimum 7-day PPA at 6 months considering non-respondents as smokers</b>                                                                  |                  |      |                         |      |                        |      | 0,8194 |
| Smokers                                                                                                                                      | 514              | 89,5 | 249                     | 89,2 | 265                    | 89,8 |        |
| Quitters                                                                                                                                     | 60               | 10,5 | 30                      | 10,8 | 30                     | 10,2 |        |
| <b>Minimum 7-day PPA at 6 months (with the use of 12-month or 3-month smoking status if missing), considering non-respondents as smokers</b> |                  |      |                         |      |                        |      | 0,2668 |
| Smokers                                                                                                                                      | 493              | 85,9 | 235                     | 84,2 | 258                    | 87,5 |        |
| Quitters                                                                                                                                     | 81               | 14,1 | 44                      | 15,8 | 37                     | 12,5 |        |
| 2018                                                                                                                                         |                  |      |                         |      |                        |      |        |
|                                                                                                                                              | Total<br>N= 1340 |      | Yes<br>N=508<br>(37,9%) |      | No<br>N=832<br>(62,1%) |      | p*     |
|                                                                                                                                              | N                | %    | N                       | %    | N                      | %    |        |
| <b>Minimum 7-day PPA at 6 months</b>                                                                                                         |                  |      |                         |      |                        |      | 0,9459 |
| Smokers                                                                                                                                      | 243              | 67,7 | 85                      | 67,5 | 158                    | 67,8 |        |
| Quitters                                                                                                                                     | 116              | 32,3 | 41                      | 32,5 | 75                     | 32,2 |        |
| <b>Minimum 7-day PPA at 6 months (with the use of 12-month or 3-month smoking status if missing)</b>                                         |                  |      |                         |      |                        |      | 0,7566 |
| Smokers                                                                                                                                      | 355              | 68,3 | 122                     | 67,4 | 233                    | 68,7 |        |
| Quitters                                                                                                                                     | 165              | 31,7 | 59                      | 32,6 | 106                    | 31,3 |        |
| <b>Minimum 7-day PPA at 6 months considering non-respondents as smokers</b>                                                                  |                  |      |                         |      |                        |      | 0,5512 |
| Smokers                                                                                                                                      | 1224             | 91,3 | 467                     | 91,9 | 757                    | 91,0 |        |
| Quitters                                                                                                                                     | 116              | 8,7  | 41                      | 8,1  | 75                     | 9,0  |        |
| <b>Minimum 7-day PPA at 6 months (with the use of 12-month or 3-month smoking status if missing), considering non-respondents as smokers</b> |                  |      |                         |      |                        |      | 0,5427 |
| Smokers                                                                                                                                      | 1175             | 87,7 | 449                     | 88,4 | 726                    | 87,3 |        |
| Quitters                                                                                                                                     | 165              | 12,3 | 59                      | 11,6 | 106                    | 12,7 |        |

\* Chi-square test

**Supplementary Table 4o. As Treated analyses / Year of inclusion**

| <b>2017</b>                                                                                                                                  |                  |      |                         |      |                         |      |        |
|----------------------------------------------------------------------------------------------------------------------------------------------|------------------|------|-------------------------|------|-------------------------|------|--------|
|                                                                                                                                              | Total<br>N= 875  |      | Yes<br>N=409<br>(46,7%) |      | No<br>N=466<br>(53,3%)  |      | p*     |
|                                                                                                                                              | N                | %    | N                       | %    | N                       | %    |        |
| <b>Minimum 7-day PPA at 6 months</b>                                                                                                         |                  |      |                         |      |                         |      | 0,3100 |
| Smokers                                                                                                                                      | 136              | 60,4 | 67                      | 57,3 | 69                      | 63,9 |        |
| Quitters                                                                                                                                     | 89               | 39,6 | 50                      | 42,7 | 39                      | 36,1 |        |
| <b>Minimum 7-day PPA at 6 months (with the use of 12-month or 3-month smoking status if missing)</b>                                         |                  |      |                         |      |                         |      | 0,1300 |
| Smokers                                                                                                                                      | 241              | 65,8 | 111                     | 62,0 | 130                     | 69,5 |        |
| Quitters                                                                                                                                     | 125              | 34,2 | 68                      | 38,0 | 57                      | 30,5 |        |
| <b>Minimum 7-day PPA at 6 months considering non-respondents as smokers</b>                                                                  |                  |      |                         |      |                         |      | 0,0597 |
| Smokers                                                                                                                                      | 786              | 89,8 | 359                     | 87,8 | 427                     | 91,6 |        |
| Quitters                                                                                                                                     | 89               | 10,2 | 50                      | 12,2 | 39                      | 8,4  |        |
| <b>Minimum 7-day PPA at 6 months (with the use of 12-month or 3-month smoking status if missing), considering non-respondents as smokers</b> |                  |      |                         |      |                         |      | 0,0638 |
| Smokers                                                                                                                                      | 750              | 85,7 | 341                     | 83,4 | 409                     | 87,8 |        |
| Quitters                                                                                                                                     | 125              | 14,3 | 68                      | 16,6 | 57                      | 12,2 |        |
| <b>2018</b>                                                                                                                                  |                  |      |                         |      |                         |      |        |
|                                                                                                                                              | Total<br>N= 1931 |      | Yes<br>N=657<br>(34,0%) |      | No<br>N=1274<br>(66,0%) |      | p*     |
|                                                                                                                                              | N                | %    | N                       | %    | N                       | %    |        |
| <b>Minimum 7-day PPA at 6 months</b>                                                                                                         |                  |      |                         |      |                         |      | 0,9818 |
| Smokers                                                                                                                                      | 341              | 67,1 | 114                     | 67,1 | 227                     | 67,2 |        |
| Quitters                                                                                                                                     | 167              | 32,9 | 56                      | 32,9 | 111                     | 32,8 |        |
| <b>Minimum 7-day PPA at 6 months (with the use of 12-month or 3-month smoking status if missing)</b>                                         |                  |      |                         |      |                         |      | 0,6455 |
| Smokers                                                                                                                                      | 511              | 67,8 | 168                     | 66,7 | 343                     | 68,3 |        |
| Quitters                                                                                                                                     | 243              | 32,2 | 84                      | 33,3 | 159                     | 31,7 |        |
| <b>Minimum 7-day PPA at 6 months considering non-respondents as smokers</b>                                                                  |                  |      |                         |      |                         |      | 0,8886 |
| Smokers                                                                                                                                      | 1764             | 91,4 | 601                     | 91,5 | 1163                    | 91,3 |        |
| Quitters                                                                                                                                     | 167              | 8,6  | 56                      | 8,5  | 111                     | 8,7  |        |
| <b>Minimum 7-day PPA at 6 months (with the use of 12-month or 3-month smoking status if missing), considering non-respondents as smokers</b> |                  |      |                         |      |                         |      | 0,8482 |
| Smokers                                                                                                                                      | 1688             | 87,4 | 573                     | 87,2 | 1115                    | 87,5 |        |
| Quitters                                                                                                                                     | 243              | 12,6 | 84                      | 12,8 | 159                     | 12,5 |        |

\* Chi-square test

Supplementary Table 4p. ITT analyses / level of education

| <b>&lt; Bac</b>                                                                                                                              |                  |      |                          |      |                         |      |        |
|----------------------------------------------------------------------------------------------------------------------------------------------|------------------|------|--------------------------|------|-------------------------|------|--------|
|                                                                                                                                              | Total<br>N= 700  |      | Yes<br>N=355<br>(50,7%)  |      | No<br>N=345<br>(49,3%)  |      | p*     |
|                                                                                                                                              | N                | %    | N                        | %    | N                       | %    |        |
| <b>Minimum 7-day PPA at 6 months</b>                                                                                                         |                  |      |                          |      |                         |      | 0,7256 |
| Smokers                                                                                                                                      | 103              | 69,6 | 49                       | 71,0 | 54                      | 68,4 |        |
| Quitters                                                                                                                                     | 45               | 30,4 | 20                       | 29,0 | 25                      | 31,6 |        |
| <b>Minimum 7-day PPA at 6 months (with the use of 12-month or 3-month smoking status if missing)</b>                                         |                  |      |                          |      |                         |      | 0,9826 |
| Smokers                                                                                                                                      | 162              | 69,2 | 79                       | 69,3 | 83                      | 69,2 |        |
| Quitters                                                                                                                                     | 72               | 30,8 | 35                       | 30,7 | 37                      | 30,8 |        |
| <b>Minimum 7-day PPA at 6 months considering non-respondents as smokers</b>                                                                  |                  |      |                          |      |                         |      | 0,3845 |
| Smokers                                                                                                                                      | 655              | 93,6 | 335                      | 94,4 | 320                     | 92,8 |        |
| Quitters                                                                                                                                     | 45               | 6,4  | 20                       | 5,6  | 25                      | 7,2  |        |
| <b>Minimum 7-day PPA at 6 months (with the use of 12-month or 3-month smoking status if missing), considering non-respondents as smokers</b> |                  |      |                          |      |                         |      | 0,7063 |
| Smokers                                                                                                                                      | 628              | 89,7 | 320                      | 90,1 | 308                     | 89,3 |        |
| Quitters                                                                                                                                     | 72               | 10,3 | 35                       | 9,9  | 37                      | 10,7 |        |
| <b>Bac and over</b>                                                                                                                          |                  |      |                          |      |                         |      |        |
|                                                                                                                                              | Total<br>N= 2086 |      | Yes<br>N=1033<br>(49,5%) |      | No<br>N=1053<br>(50,5%) |      | p*     |
|                                                                                                                                              | N                | %    | N                        | %    | N                       | %    |        |
| <b>Minimum 7-day PPA at 6 months</b>                                                                                                         |                  |      |                          |      |                         |      | 0,9990 |
| Smokers                                                                                                                                      | 374              | 64,3 | 169                      | 64,3 | 205                     | 64,3 |        |
| Quitters                                                                                                                                     | 208              | 35,7 | 94                       | 35,7 | 114                     | 35,7 |        |
| <b>Minimum 7-day PPA at 6 months (with the use of 12-month or 3-month smoking status if missing)</b>                                         |                  |      |                          |      |                         |      | 0,3931 |
| Smokers                                                                                                                                      | 588              | 66,8 | 262                      | 65,3 | 326                     | 68,1 |        |
| Quitters                                                                                                                                     | 292              | 33,2 | 139                      | 34,7 | 153                     | 31,9 |        |
| <b>Minimum 7-day PPA at 6 months considering non-respondents as smokers</b>                                                                  |                  |      |                          |      |                         |      | 0,1882 |
| Smokers                                                                                                                                      | 1878             | 90,0 | 939                      | 90,9 | 939                     | 89,2 |        |
| Quitters                                                                                                                                     | 208              | 10,0 | 94                       | 9,1  | 114                     | 10,8 |        |
| <b>Minimum 7-day PPA at 6 months (with the use of 12-month or 3-month smoking status if missing), considering non-respondents as smokers</b> |                  |      |                          |      |                         |      | 0,4797 |
| Smokers                                                                                                                                      | 1794             | 86,0 | 894                      | 86,5 | 900                     | 85,5 |        |
| Quitters                                                                                                                                     | 292              | 14,0 | 139                      | 13,5 | 153                     | 14,5 |        |

\* Chi-square test

Supplementary Table 4q. PP analyses / level of education

| <b>&lt; bac</b>                                                                                                                              |  |                  |      |                         |      |                        |      |        |
|----------------------------------------------------------------------------------------------------------------------------------------------|--|------------------|------|-------------------------|------|------------------------|------|--------|
|                                                                                                                                              |  | Total<br>N= 463  |      | Yes<br>N=177<br>(38,2%) |      | No<br>N=286<br>(61,8%) |      |        |
|                                                                                                                                              |  | N                | %    | N                       | %    | N                      | %    | p*     |
| <b>Minimum 7-day PPA at 6 months</b>                                                                                                         |  |                  |      |                         |      |                        |      | 0,8258 |
| Smokers                                                                                                                                      |  | 66               | 69,5 | 22                      | 71,0 | 44                     | 68,8 |        |
| Quitters                                                                                                                                     |  | 29               | 30,5 | 9                       | 29,0 | 20                     | 31,3 |        |
| <b>Minimum 7-day PPA at 6 months (with the use of 12-month or 3-month smoking status if missing)</b>                                         |  |                  |      |                         |      |                        |      | 0,7238 |
| Smokers                                                                                                                                      |  | 104              | 70,3 | 37                      | 68,5 | 67                     | 71,3 |        |
| Quitters                                                                                                                                     |  | 44               | 29,7 | 17                      | 31,5 | 27                     | 28,7 |        |
| <b>Minimum 7-day PPA at 6 months considering non-respondents as smokers</b>                                                                  |  |                  |      |                         |      |                        |      | 0,4102 |
| Smokers                                                                                                                                      |  | 434              | 93,7 | 168                     | 94,9 | 266                    | 93,0 |        |
| Quitters                                                                                                                                     |  | 29               | 6,3  | 9                       | 5,1  | 20                     | 7,0  |        |
| <b>Minimum 7-day PPA at 6 months (with the use of 12-month or 3-month smoking status if missing), considering non-respondents as smokers</b> |  |                  |      |                         |      |                        |      | 0,9534 |
| Smokers                                                                                                                                      |  | 419              | 90,5 | 160                     | 90,4 | 259                    | 90,6 |        |
| Quitters                                                                                                                                     |  | 44               | 9,5  | 17                      | 9,6  | 27                     | 9,4  |        |
| <b>Bac and over</b>                                                                                                                          |  |                  |      |                         |      |                        |      |        |
|                                                                                                                                              |  | Total<br>N= 1436 |      | Yes<br>N=601<br>(41,9%) |      | No<br>N=835<br>(58,1%) |      |        |
|                                                                                                                                              |  | N                | %    | N                       | %    | N                      | %    | p*     |
| <b>Minimum 7-day PPA at 6 months</b>                                                                                                         |  |                  |      |                         |      |                        |      | 0,6588 |
| Smokers                                                                                                                                      |  | 268              | 64,7 | 106                     | 63,5 | 162                    | 65,6 |        |
| Quitters                                                                                                                                     |  | 146              | 35,3 | 61                      | 36,5 | 85                     | 34,4 |        |
| <b>Minimum 7-day PPA at 6 months (with the use of 12-month or 3-month smoking status if missing)</b>                                         |  |                  |      |                         |      |                        |      | 0,2444 |
| Smokers                                                                                                                                      |  | 407              | 67,1 | 153                     | 64,3 | 254                    | 68,8 |        |
| Quitters                                                                                                                                     |  | 200              | 32,9 | 85                      | 35,7 | 115                    | 31,2 |        |
| <b>Minimum 7-day PPA at 6 months considering non-respondents as smokers</b>                                                                  |  |                  |      |                         |      |                        |      | 0,9852 |
| Smokers                                                                                                                                      |  | 1290             | 89,8 | 540                     | 89,9 | 750                    | 89,8 |        |
| Quitters                                                                                                                                     |  | 146              | 10,2 | 61                      | 10,1 | 85                     | 10,2 |        |
| <b>Minimum 7-day PPA at 6 months (with the use of 12-month or 3-month smoking status if missing), considering non-respondents as smokers</b> |  |                  |      |                         |      |                        |      | 0,8414 |
| Smokers                                                                                                                                      |  | 1236             | 86,1 | 516                     | 85,9 | 720                    | 86,2 |        |
| Quitters                                                                                                                                     |  | 200              | 13,9 | 85                      | 14,1 | 115                    | 13,8 |        |

\* Chi-square test

Supplementary Table 4r. As Treated analyses / level of education

| <b>&lt; Bac</b>                                                                                                                              |                  |      |                         |      |                         |      |        |
|----------------------------------------------------------------------------------------------------------------------------------------------|------------------|------|-------------------------|------|-------------------------|------|--------|
|                                                                                                                                              | Total<br>N= 700  |      | Yes<br>N=236<br>(33,7%) |      | No<br>N=464<br>(66,3%)  |      | p*     |
|                                                                                                                                              | N                | %    | N                       | %    | N                       | %    |        |
| <b>Minimum 7-day PPA at 6 months</b>                                                                                                         |                  |      |                         |      |                         |      | 0,9958 |
| Smokers                                                                                                                                      | 103              | 69,6 | 32                      | 69,6 | 71                      | 69,6 |        |
| Quitters                                                                                                                                     | 45               | 30,4 | 14                      | 30,4 | 31                      | 30,4 |        |
| <b>Minimum 7-day PPA at 6 months (with the use of 12-month or 3-month smoking status if missing)</b>                                         |                  |      |                         |      |                         |      | 0,4764 |
| Smokers                                                                                                                                      | 162              | 69,2 | 53                      | 66,3 | 109                     | 70,8 |        |
| Quitters                                                                                                                                     | 72               | 30,8 | 27                      | 33,8 | 45                      | 29,2 |        |
| <b>Minimum 7-day PPA at 6 months considering non-respondents as smokers</b>                                                                  |                  |      |                         |      |                         |      | 0,7026 |
| Smokers                                                                                                                                      | 655              | 93,6 | 222                     | 94,1 | 433                     | 93,3 |        |
| Quitters                                                                                                                                     | 45               | 6,4  | 14                      | 5,9  | 31                      | 6,7  |        |
| <b>Minimum 7-day PPA at 6 months (with the use of 12-month or 3-month smoking status if missing), considering non-respondents as smokers</b> |                  |      |                         |      |                         |      | 0,4731 |
| Smokers                                                                                                                                      | 628              | 89,7 | 209                     | 88,6 | 419                     | 90,3 |        |
| Quitters                                                                                                                                     | 72               | 10,3 | 27                      | 11,4 | 45                      | 9,7  |        |
| <b>Bac and over</b>                                                                                                                          |                  |      |                         |      |                         |      |        |
|                                                                                                                                              | Total<br>N= 2086 |      | Yes<br>N=819<br>(39,3%) |      | No<br>N=1267<br>(60,7%) |      | p*     |
|                                                                                                                                              | N                | %    | N                       | %    | N                       | %    |        |
| <b>Minimum 7-day PPA at 6 months</b>                                                                                                         |                  |      |                         |      |                         |      | 0,4202 |
| Smokers                                                                                                                                      | 374              | 64,3 | 149                     | 62,3 | 225                     | 65,6 |        |
| Quitters                                                                                                                                     | 208              | 35,7 | 90                      | 37,7 | 118                     | 34,4 |        |
| <b>Minimum 7-day PPA at 6 months (with the use of 12-month or 3-month smoking status if missing)</b>                                         |                  |      |                         |      |                         |      | 0,2704 |
| Smokers                                                                                                                                      | 588              | 66,8 | 225                     | 64,7 | 363                     | 68,2 |        |
| Quitters                                                                                                                                     | 292              | 33,2 | 123                     | 35,3 | 169                     | 31,8 |        |
| <b>Minimum 7-day PPA at 6 months considering non-respondents as smokers</b>                                                                  |                  |      |                         |      |                         |      | 0,2123 |
| Smokers                                                                                                                                      | 1878             | 90,0 | 729                     | 89,0 | 1149                    | 90,7 |        |
| Quitters                                                                                                                                     | 208              | 10,0 | 90                      | 11,0 | 118                     | 9,3  |        |
| <b>Minimum 7-day PPA at 6 months (with the use of 12-month or 3-month smoking status if missing), considering non-respondents as smokers</b> |                  |      |                         |      |                         |      | 0,2803 |
| Smokers                                                                                                                                      | 1794             | 86,0 | 696                     | 85,0 | 1098                    | 86,7 |        |
| Quitters                                                                                                                                     | 292              | 14,0 | 123                     | 15,0 | 169                     | 13,3 |        |

\* Chi-square test
